# Supplementary material for: Causal associations of fatigue and functional outcome after ischemic stroke: a mediation Mendelian randomization study
Source: Front Neurol. 2024 Jul 25;15:1415553. doi: 10.3389/fneur.2024.1415553 (PMC11306070; doi:10.3389/fneur.2024.1415553)
Supplement: Supplementary file 1 [file Table_1.XLSX]

## Sheet: Table S1
Supplementary Table S1. GISCOME collaboration cohort details, adapted from Soderholm et al. 2019.
Center	Australia	Barcelona			Boston			Cincinnati	Gothenburg		Helsinki	Leuven	Lund		Malmö	Oxford	Washington
Cohort abbreviation	Australia	HdM	VdH-1	VdH-2	MGH-1	MGH-2	MGH-3	Cincinnati	SAHLSIS	SAHLSIS RS	Finland	Leuven	LSR-1	LSR-2	MDC	Oxford	WashU
	Gender	Age	NIHSS	mRS							mRS 0-2 vs. 3-6
Cohort	Male/Female	Mean(SD)	Median(IQR)	0	1	2	3	4	5	6
Australia	270/232	71.5(13.1)	4(2-8)	24	190	132	64	39	16	37	332 vs 145
Cincinnati	194/160	69.5(13.1)	4(2-8)	26	71	73	71	67	18	28	168 vs 179
Finland	212/130	63.9(12.6)	5(2-10)	63	97	77	47	43	3	12	237 vs 105
HdM	483/423	75.1(11.2)	5(3-12)	153	151	149	125	138	38	152	448 vs 451
Leuven	269/189	67.5(14.5)	4(2-8)	114	130	98	53	39	6	18	342 vs 116
LSR-1	256/233	74.3(12.8)	3(2-7.25)	-	260	-	100	43	38	48	260 vs 229
LSR-2	263/215	71.7(13.0)	4(2-8)	-	259	-	73	64	31	51	259 vs 219
MDC	170/178	78.4(6.1)	2(0-7)	-	136	-	104	47	28	33	136 vs 212
MGH-1	28/21	69.6(16.5)	4(2-10.5)	10	11	4	5	5	0	14	25 vs 23
MGH-2	48/28	66.9(13.1)	3(1-7)	22	24	10	10	5	0	5	56 vs 19
MGH-3	143/82	64.9(15.6)	3(1-8)	55	70	38	23	16	2	21	157 vs 53
Oxford	218/235	74.6(12.3)	2(0-4)	67	127	73	89	35	19	43	264 vs 184
SAHLSIS	487/273	55.8(10.7)	2(1-7)	97	174	330	94	52	2	11	593 vs 156
SAHLSIS-RS	258/140	56.1(10.7)	2(0-6)	-	317	-	49	21	8	3	277 vs 66
VdH-1	68/62	71.2(10.5)	15(9-18)	22	32	17	20	24	15	0	71 vs 59
VdH-2	78/27	68.2(11.4)	3(1.75-8)	30	25	16	12	12	4	6	67 vs 34
WashU	52/40	67.2(14.3)	8(4-12)	23	24	9	14	9	8	5	49 vs 30
TOTAL	3497/2668	68.7(14.1)	4(2-8)	706	2098	1026	953	659	236	487	3741 vs 2280
Abbreviations: NIHSS; National Institutes of Health Stroke Scale, mRS; modified Rankin Scale, SD; standard deviation, IQR; interquartile range
Reference: M. Soderholm, A. Pedersen, E. Lorentzen, T.M. Stanne, S. Bevan, M. Olsson, J.W. Cole, I. Fernandez-Cadenas, G.J. Hankey, J. Jimenez-Conde, K. Jood, J.M. Lee, R. Lemmens, C. Levi, B.D. Mitchell, B. Norrving, K. Rannikmae, N.S. Rost, J. Rosand, P.M. Rothwell, R. Scott, D. Strbian, J.W. Sturm, C. Sudlow, M. Traylor, V. Thijs, T. Tatlisumak, D. Woo, B.B. Worrall, J.M. Maguire, A. Lindgren,…

## Sheet: Table S2
Supplementary Table S2. Instruments for genetically determined risk of fatigue.
	SNP	effect_allele.exposure	other_allele.exposure	effect_allele.outcome	other_allele.outcome	beta.exposure	beta.outcome	eaf.exposure	eaf.outcome	se.outcome	pval.outcome	outcome	se.exposure	pval.exposure	samplesize.exposure	exposure	FSTAT
1	rs10438710	G	A	G	A	-0.0157706	0.0511	0.794406	0.209	0.0538	0.3423	mRS 0-2 vs 3-6 at 3 months	0.00218063	4.8e-13	449019	Frequency of tiredness in last 2 weeks	52.3035
2	rs10732635	G	T	G	T	0.0102843	0.028	0.445322	0.5751	0.0422	0.5065	mRS 0-2 vs 3-6 at 3 months	0.00175247	4.4e-09	449019	Frequency of tiredness in last 2 weeks	34.4387
3	rs10761238	T	C	T	C	-0.0101932	-0.002	0.351783	0.6398	0.0434	0.9626	mRS 0-2 vs 3-6 at 3 months	0.00183619	2.8e-08	449019	Frequency of tiredness in last 2 weeks	30.8165
4	rs111657181	C	G	C	G	0.0134634	-0.0361	0.150183	0.1412	0.0607	0.5521	mRS 0-2 vs 3-6 at 3 months	0.00244157	3.5e-08	449019	Frequency of tiredness in last 2 weeks	30.4067
5	rs11625230	C	T	C	T	-0.0124248	-0.0119	0.247512	0.7445	0.0525	0.8213	mRS 0-2 vs 3-6 at 3 months	0.00202721	8.8e-10	449019	Frequency of tiredness in last 2 weeks	37.5647
6	rs117228037	C	A	C	A	-0.0656111	0.0399	0.007366	0.9846	0.2345	0.8647	mRS 0-2 vs 3-6 at 3 months	0.010947	2.1e-09	449019	Frequency of tiredness in last 2 weeks	35.9222
7	rs11936348	T	C	T	C	-0.0109177	-0.0848	0.296337	0.7134	0.0463	0.0672	mRS 0-2 vs 3-6 at 3 months	0.0019116	1.1e-08	449019	Frequency of tiredness in last 2 weeks	32.6187
8	rs12218281	C	T	C	T	-0.0116835	-0.0668	0.622505	0.3605	0.0436	0.1253	mRS 0-2 vs 3-6 at 3 months	0.00180095	8.7e-11	449019	Frequency of tiredness in last 2 weeks	42.0863
9	rs12967855	G	A	G	A	-0.0111457	0.0122	0.668905	0.3325	0.0496	0.8053	mRS 0-2 vs 3-6 at 3 months	0.00186244	2.2e-09	449019	Frequency of tiredness in last 2 weeks	35.8136
10	rs1464307	A	G	A	G	0.0125983	0.0715	0.646713	0.3411	0.0486	0.1409	mRS 0-2 vs 3-6 at 3 months	0.00182673	5.3e-12	449019	Frequency of tiredness in last 2 weeks	47.5634
11	rs17374635	C	T	C	T	-0.0103017	-0.0124	0.31835	0.6932	0.046	0.7874	mRS 0-2 vs 3-6 at 3 months	0.00188205	4.4e-08	449019	Frequency of tiredness in last 2 weeks	29.9608
12	rs2426132	C	G	C	G	0.010651	0.0035	0.458462	0.4385	0.0418	0.9327	mRS 0-2 vs 3-6 at 3 months	0.00175218	1.2e-09	449019	Frequency of tiredness in last 2 weeks	36.9506
13	rs2820309	G	A	G	A	0.0116782	0.0456	0.344964	0.6777	0.0456	0.3167	mRS 0-2 vs 3-6 at 3 months	0.00183401	1.9e-10	449019	Frequency of tiredness in last 2 weeks	40.5459
14	rs2847308	T	C	T	C	-0.0113946	-0.0404	0.671466	0.3346	0.0449	0.3684	mRS 0-2 vs 3-6 at 3 months	0.00185665	8.4e-10	449019	Frequency of tiredness in last 2 weeks	37.6648
15	rs28780988	A	C	A	C	0.0178346	0.0449	0.122156	0.8644	0.0665	0.5	mRS 0-2 vs 3-6 at 3 months	0.00265925	2e-11	449019	Frequency of tiredness in last 2 weeks	44.9787
16	rs34299746	T	G	T	G	-0.0112145	-0.0258	0.421202	0.5907	0.0432	0.5499	mRS 0-2 vs 3-6 at 3 months	0.00176963	2.3e-10	449019	Frequency of tiredness in last 2 weeks	40.1599
17	rs34811474	A	G	A	G	-0.0121291	0.0337	0.2307	0.7763	0.0521	0.5172	mRS 0-2 vs 3-6 at 3 months	0.002071	4.7e-09	449019	Frequency of tiredness in last 2 weeks	34.3001
18	rs35757374	G	A	G	A	0.0107025	0.0942	0.341271	0.6714	0.0448	0.03565	mRS 0-2 vs 3-6 at 3 months	0.00184839	7e-09	449019	Frequency of tiredness in last 2 weeks	33.526
19	rs4588900	A	G	A	G	0.0100296	-0.0407	0.51551	0.464	0.0424	0.3368	mRS 0-2 vs 3-6 at 3 months	0.00174608	9.2e-09	449019	Frequency of tiredness in last 2 weeks	32.9942
20	rs4619804	C	A	C	A	0.011303	-0.0078	0.737279	0.2741	0.0473	0.8688	mRS 0-2 vs 3-6 at 3 months	0.0019906	1.4e-08	449019	Frequency of tiredness in last 2 weeks	32.2417
21	rs4701803	T	C	T	C	-0.00985094	0.0427	0.56534	0.4249	0.0475	0.3696	mRS 0-2 vs 3-6 at 3 months	0.00176256	2.3e-08	449019	Frequency of tiredness in last 2 weeks	31.2367
22	rs529200	G	A	G	A	0.00971146	0.1	0.527591	0.4597	0.0464	0.03124	mRS 0-2 vs 3-6 at 3 months	0.0017486	2.8e-08	449019	Frequency of tiredness in last 2 weeks	30.8451
23	rs55966171	A	G	A	G	0.0103895	0.0409	0.335681	0.6628	0.0447	0.3599	mRS 0-2 vs 3-6 at 3 months	0.00185598	2.2e-08	449019	Frequency of tiredness in last 2 weeks	31.3358
24	rs589092	G	A	G	A	-0.0100074	-0.0301	0.506889	0.473	0.0423	0.4763	mRS 0-2 vs 3-6 at 3 months	0.00174664	1e-08	449019	Frequency of tiredness in last 2 weeks	32.8272
25	rs598769	T	C	T	C	0.00976743	-0.0741	0.469887	0.5385	0.0474	0.118	mRS 0-2 vs 3-6 at 3 months	0.00174926	2.4e-08	449019	Frequency of tiredness in last 2 weeks	31.1781
26	rs62444907	T	C	T	C	-0.0135084	-0.0439	0.155217	0.8165	0.0553	0.428	mRS 0-2 vs 3-6 at 3 months	0.0024118	2.1e-08	449019	Frequency of tiredness in last 2 weeks	31.3706
27	rs62471111	C	T	C	T	0.00967283	-0.0347	0.477803	0.5216	0.0463	0.4535	mRS 0-2 vs 3-6 at 3 months	0.00174428	2.9e-08	449019	Frequency of tiredness in last 2 weeks	30.752
28	rs6421926	C	T	C	T	-0.0107056	-0.0144	0.674978	0.3147	0.0451	0.75	mRS 0-2 vs 3-6 at 3 months	0.00186087	8.8e-09	449019	Frequency of tiredness in last 2 weeks	33.097
29	rs6425280	G	A	G	A	-0.0100111	-0.0264	0.462613	0.5355	0.0422	0.5312	mRS 0-2 vs 3-6 at 3 months	0.00174922	1e-08	449019	Frequency of tiredness in last 2 weeks	32.7546
30	rs6896622	A	G	A	G	-0.0105534	0.0001	0.457946	0.5331	0.0421	0.9973	mRS 0-2 vs 3-6 at 3 months	0.00174839	1.6e-09	449019	Frequency of tiredness in last 2 weeks	36.4339
31	rs7131681	T	C	T	C	-0.0117482	-0.0397	0.60186	0.4106	0.0468	0.3961	mRS 0-2 vs 3-6 at 3 months	0.00178441	4.6e-11	449019	Frequency of tiredness in last 2 weeks	43.3462
32	rs7316486	G	A	G	A	0.013882	0.0161	0.344116	0.665	0.0497	0.7468	mRS 0-2 vs 3-6 at 3 months	0.00184592	5.5e-14	449019	Frequency of tiredness in last 2 weeks	56.5557
33	rs77087420	G	A	G	A	-0.0223936	0.0232	0.054661	0.9458	0.0976	0.8119	mRS 0-2 vs 3-6 at 3 months	0.00383847	5.4e-09	449019	Frequency of tiredness in last 2 weeks	34.0353
34	rs8089865	A	G	A	G	0.0117264	0.0794	0.578514	0.4114	0.0429	0.06377	mRS 0-2 vs 3-6 at 3 months	0.00177044	3.5e-11	449019	Frequency of tiredness in last 2 weeks	43.8697
35	rs818215	C	A	C	A	-0.011084	0.0151	0.459631	0.5263	0.0428	0.7247	mRS 0-2 vs 3-6 at 3 months	0.0017544	2.7e-10	449019	Frequency of tiredness in last 2 weeks	39.9148
36	rs82334	C	A	C	A	-0.0120382	-0.0199	0.315286	0.6796	0.0454	0.661	mRS 0-2 vs 3-6 at 3 months	0.00187816	1.5e-10	449019	Frequency of tiredness in last 2 weeks	41.0824

## Sheet: Table S3
	chr.exposure	pos.exposure	beta.exposure	se.exposure	pval.exposure	samplesize.exposure	id.exposure	SNP	effect_allele.exposure	other_allele.exposure	eaf.exposure	exposure	mr_keep.exposure	pval_origin.exposure	data_source.exposure
1	1	62960250	0.085968	0.011215	3.82e-14	21552	met-c-932	rs1168041	C	T	0.72198	Triglycerides in small VLDL || id:met-c-932	TRUE	reported	igd
2	2	21225281	0.105215	0.011161	1.33e-20	21557	met-c-932	rs1042034	T	C	0.745366	Triglycerides in small VLDL || id:met-c-932	TRUE	reported	igd
3	2	27730940	-0.099454	0.0102	6.23e-22	21558	met-c-932	rs1260326	C	T	0.638917	Triglycerides in small VLDL || id:met-c-932	TRUE	reported	igd
4	6	43756169	-0.095172	0.016114	5.55e-09	19267	met-c-932	rs9472125	T	C	0.166579	Triglycerides in small VLDL || id:met-c-932	TRUE	reported	igd
5	7	73016181	-0.112532	0.014383	1.14e-14	21552	met-c-932	rs34346326	C	T	0.142653	Triglycerides in small VLDL || id:met-c-932	TRUE	reported	igd
6	8	19912370	-0.176148	0.016652	1.58e-25	21554	met-c-932	rs115849089	A	G	0.107414	Triglycerides in small VLDL || id:met-c-932	TRUE	reported	igd
7	8	126478350	-0.072197	0.009825	4.07e-13	21557	met-c-932	rs2980853	C	A	0.487051	Triglycerides in small VLDL || id:met-c-932	TRUE	reported	igd
8	11	116648917	-0.242285	0.013959	7.63e-66	21556	met-c-932	rs964184	C	G	0.861774	Triglycerides in small VLDL || id:met-c-932	TRUE	reported	igd
9	16	56993886	-0.108607	0.011634	3.09e-20	21556	met-c-932	rs821840	G	A	0.263477	Triglycerides in small VLDL || id:met-c-932	TRUE	reported	igd
10	17	41926126	0.215165	0.035834	3.08e-09	19270	met-c-932	rs72836561	T	C	0.024935	Triglycerides in small VLDL || id:met-c-932	TRUE	reported	igd
11	19	19366632	-0.154882	0.021006	3.39e-13	21555	met-c-932	rs72999033	T	C	0.059264	Triglycerides in small VLDL || id:met-c-932	TRUE	reported	igd
12	19	8429323	-0.211441	0.035005	2.49e-09	19268	met-c-932	rs116843064	A	G	0.029194	Triglycerides in small VLDL || id:met-c-932	TRUE	reported	igd
13	19	45418961	0.089897	0.011109	1.37e-15	21552	met-c-932	rs3826688	C	T	0.676817	Triglycerides in small VLDL || id:met-c-932	TRUE	reported	igd
14	20	44534651	0.075779	0.011695	1.6e-10	21557	met-c-932	rs6065904	A	G	0.228686	Triglycerides in small VLDL || id:met-c-932	TRUE	reported	igd
15	1	230302838	0.0437203	0.00415751	8e-27	NA	met-d-S_VLDL_TG	rs59484402	C	CT	0.388312	Triglycerides in small VLDL || id:met-d-S_VLDL_TG	TRUE	reported	igd
16	1	27284913	0.108444	0.0133058	1.8e-15	NA	met-d-S_VLDL_TG	rs79598313	T	C	0.023202	Triglycerides in small VLDL || id:met-d-S_VLDL_TG	TRUE	reported	igd
17	1	63097424	0.0855092	0.00419445	1.1e-95	NA	met-d-S_VLDL_TG	rs141409973	A	AG	0.647626	Triglycerides in small VLDL || id:met-d-S_VLDL_TG	TRUE	reported	igd
18	1	109616550	-0.0327602	0.00592837	4.8e-08	NA	met-d-S_VLDL_TG	rs561096	T	G	0.135555	Triglycerides in small VLDL || id:met-d-S_VLDL_TG	TRUE	reported	igd
19	2	21221035	0.122542	0.00492529	3.5e-140	NA	met-d-S_VLDL_TG	rs4665710	C	A	0.79259	Triglycerides in small VLDL || id:met-d-S_VLDL_TG	TRUE	reported	igd
20	2	227073854	0.0394509	0.00429032	3.6e-20	NA	met-d-S_VLDL_TG	rs1515098	T	C	0.680929	Triglycerides in small VLDL || id:met-d-S_VLDL_TG	TRUE	reported	igd
21	2	21531266	-0.026405	0.00410465	1.2e-10	NA	met-d-S_VLDL_TG	rs1510606	A	G	0.396984	Triglycerides in small VLDL || id:met-d-S_VLDL_TG	TRUE	reported	igd
22	2	20369562	-0.0210096	0.00400988	4.3e-08	NA	met-d-S_VLDL_TG	rs870526	T	C	0.521399	Triglycerides in small VLDL || id:met-d-S_VLDL_TG	TRUE	reported	igd
23	2	27730940	-0.105331	0.00409172	5.4e-153	NA	met-d-S_VLDL_TG	rs1260326	C	T	0.603982	Triglycerides in small VLDL || id:met-d-S_VLDL_TG	TRUE	reported	igd
24	2	165528624	-0.0460053	0.00410202	1.3e-30	NA	met-d-S_VLDL_TG	rs1128249	T	G	0.391999	Triglycerides in small VLDL || id:met-d-S_VLDL_TG	TRUE	reported	igd
25	3	172294500	0.0690952	0.0121593	3.8e-09	NA	met-d-S_VLDL_TG	rs79287178	A	G	0.0311	Triglycerides in small VLDL || id:met-d-S_VLDL_TG	TRUE	reported	igd
26	3	135956305	0.0361318	0.00474571	5.8e-15	NA	met-d-S_VLDL_TG	rs684773	C	A	0.767067	Triglycerides in small VLDL || id:met-d-S_VLDL_TG	TRUE	reported	igd
27	4	100508556	-0.0404246	0.00723078	1.3e-08	NA	met-d-S_VLDL_TG	rs2035816	G	A	0.0843	Triglycerides in small VLDL || id:met-d-S_VLDL_TG	TRUE	reported	igd
28	4	77414144	0.0222659	0.00402666	2.9e-09	NA	met-d-S_VLDL_TG	rs10008637	C	T	0.461937	Triglycerides in small VLDL || id:met-d-S_VLDL_TG	TRUE	reported	igd
29	4	3443931	-0.0408902	0.00414989	5.2e-25	NA	met-d-S_VLDL_TG	rs13108218	G	A	0.615355	Triglycerides in small VLDL || id:met-d-S_VLDL_TG	TRUE	reported	igd
30	4	87976359	0.0318607	0.00411392	5.8e-16	NA	met-d-S_VLDL_TG	rs1471251	T	A	0.397126	Triglycerides in small VLDL || id:met-d-S_VLDL_TG	TRUE	reported	igd
31	4	15106036	0.0252321	0.00425759	3.6e-10	NA	met-d-S_VLDL_TG	rs3857142	T	C	0.663407	Triglycerides in small VLDL || id:met-d-S_VLDL_TG	TRUE	reported	igd
32	4	171563776	-0.0250075	0.0047161	2.2e-08	NA	met-d-S_VLDL_TG	rs4491981	A	C	0.241217	Triglycerides in small VLDL || id:met-d-S_VLDL_TG	TRUE	reported	igd
33	5	156443066	0.0402263	0.00418285	2.4e-23	NA	met-d-S_VLDL_TG	rs4704834	G	A	0.644037	Triglycerides in small VLDL || id:met-d-S_VLDL_TG	TRUE	reported	igd
34	5	57610069	-0.0243993	0.00411879	2.9e-10	NA	met-d-S_VLDL_TG	rs37538	C	G	0.602796	Triglycerides in small VLDL || id:met-d-S_VLDL_TG	TRUE	reported	igd
35	5	78531337	-0.0231866	0.00409951	4.9e-08	NA	met-d-S_VLDL_TG	rs1316753	C	G	0.394893	Triglycerides in small VLDL || id:met-d-S_VLDL_TG	TRUE	reported	igd
36	5	55857025	-0.0585679	0.00511045	2.7e-30	NA	met-d-S_VLDL_TG	rs11429307	G	GT	0.808481	Triglycerides in small VLDL || id:met-d-S_VLDL_TG	TRUE	reported	igd
37	6	160543148	0.049695	0.00787655	6.3e-11	NA	met-d-S_VLDL_TG	rs12208357	T	C	0.069998	Triglycerides in small VLDL || id:met-d-S_VLDL_TG	TRUE	reported	igd
38	6	32587213	0.0450506	0.00413197	2.3e-28	NA	met-d-S_VLDL_TG	rs28383314	C	T	0.62295	Triglycerides in small VLDL || id:met-d-S_VLDL_TG	TRUE	reported	igd
39	6	31303922	0.0298932	0.0041552	1.6e-11	NA	met-d-S_VLDL_TG	rs28752924	C	T	0.445527	Triglycerides in small VLDL || id:met-d-S_VLDL_TG	TRUE	reported	igd
40	6	161010118	-0.130828	0.00742466	1.1e-72	NA	met-d-S_VLDL_TG	rs10455872	G	A	0.07899	Triglycerides in small VLDL || id:met-d-S_VLDL_TG	TRUE	reported	igd
41	6	43757896	0.0326393	0.0040102	8.2e-17	NA	met-d-S_VLDL_TG	rs998584	A	C	0.482334	Triglycerides in small VLDL || id:met-d-S_VLDL_TG	TRUE	reported	igd
42	6	161125454	0.0569856	0.0078429	4.7e-14	NA	met-d-S_VLDL_TG	rs12212146	C	T	0.074301	Triglycerides in small VLDL || id:met-d-S_VLDL_TG	TRUE	reported	igd
43	6	127439297	0.0306197	0.00402394	2.7e-15	NA	met-d-S_VLDL_TG	rs2800709	G	T	0.519847	Triglycerides in small VLDL || id:met-d-S_VLDL_TG	TRUE	reported	igd
44	6	31850308	0.0624581	0.00968542	8.1e-12	NA	met-d-S_VLDL_TG	rs74434374	A	C	0.044815	Triglycerides in small VLDL || id:met-d-S_VLDL_TG	TRUE	reported	igd
45	6	109127376	-0.0225605	0.00412355	3.1e-08	NA	met-d-S_VLDL_TG	rs9374046	A	G	0.394649	Triglycerides in small VLDL || id:met-d-S_VLDL_TG	TRUE	reported	igd
46	6	160922870	-0.242623	0.0148583	3e-61	NA	met-d-S_VLDL_TG	rs117733303	G	A	0.0185	Triglycerides in small VLDL || id:met-d-S_VLDL_TG	TRUE	reported	igd
47	6	139834012	-0.0373548	0.00414337	1e-18	NA	met-d-S_VLDL_TG	rs632057	G	T	0.627779	Triglycerides in small VLDL || id:met-d-S_VLDL_TG	TRUE	reported	igd
48	7	73037956	-0.139948	0.00587503	2.4e-123	NA	met-d-S_VLDL_TG	rs34060476	G	A	0.134803	Triglycerides in small VLDL || id:met-d-S_VLDL_TG	TRUE	reported	igd
49	7	130433594	0.0306328	0.00432698	6.4e-13	NA	met-d-S_VLDL_TG	rs11976955	G	C	0.314213	Triglycerides in small VLDL || id:met-d-S_VLDL_TG	TRUE	reported	igd
50	7	73123473	0.0796141	0.00930432	9.8e-18	NA	met-d-S_VLDL_TG	rs72555385	G	A	0.04931	Triglycerides in small VLDL || id:met-d-S_VLDL_TG	TRUE	reported	igd
51	7	25983400	-0.0300645	0.00418778	9.3e-14	NA	met-d-S_VLDL_TG	rs56001710	T	A	0.58058	Triglycerides in small VLDL || id:met-d-S_VLDL_TG	TRUE	reported	igd
52	8	19733244	-0.0713088	0.0048804	2.8e-48	NA	met-d-S_VLDL_TG	rs1561748	C	G	0.267457	Triglycerides in small VLDL || id:met-d-S_VLDL_TG	TRUE	reported	igd
53	8	59388565	-0.0249099	0.00423925	3.8e-09	NA	met-d-S_VLDL_TG	rs2081687	C	T	0.663094	Triglycerides in small VLDL || id:met-d-S_VLDL_TG	TRUE	reported	igd
54	8	11665805	-0.0365738	0.00430051	9e-17	NA	met-d-S_VLDL_TG	rs1736070	T	C	0.66642	Triglycerides in small VLDL || id:met-d-S_VLDL_TG	TRUE	reported	igd
55	8	126631799	0.0347461	0.00491671	5.7e-13	NA	met-d-S_VLDL_TG	rs3860847	A	G	0.212511	Triglycerides in small VLDL || id:met-d-S_VLDL_TG	TRUE	reported	igd
56	8	18239697	0.0319576	0.00520914	2.7e-10	NA	met-d-S_VLDL_TG	rs13266992	C	T	0.18057	Triglycerides in small VLDL || id:met-d-S_VLDL_TG	TRUE	reported	igd
57	8	19819724	-0.209569	0.00664348	1e-200	NA	met-d-S_VLDL_TG	rs328	G	C	0.10031	Triglycerides in small VLDL || id:met-d-S_VLDL_TG	TRUE	reported	igd
58	8	126500031	-0.0865789	0.00410172	4.1e-103	NA	met-d-S_VLDL_TG	rs28601761	G	C	0.420164	Triglycerides in small VLDL || id:met-d-S_VLDL_TG	TRUE	reported	igd
59	9	107661742	-0.0264082	0.00455344	2.4e-08	NA	met-d-S_VLDL_TG	rs2740488	C	A	0.265313	Triglycerides in small VLDL || id:met-d-S_VLDL_TG	TRUE	reported	igd
60	10	64882300	-0.0420773	0.00404046	4.1e-26	NA	met-d-S_VLDL_TG	rs10761716	G	C	0.441499	Triglycerides in small VLDL || id:met-d-S_VLDL_TG	TRUE	reported	igd
61	10	94839642	-0.0257044	0.00402807	1.2e-11	NA	met-d-S_VLDL_TG	rs2068888	A	G	0.450086	Triglycerides in small VLDL || id:met-d-S_VLDL_TG	TRUE	reported	igd
62	11	117156893	-0.229719	0.0203835	2.1e-29	NA	met-d-S_VLDL_TG	rs1047964	T	G	0.010073	Triglycerides in small VLDL || id:met-d-S_VLDL_TG	TRUE	reported	igd
63	11	116389017	0.0256304	0.00437474	5.2e-09	NA	met-d-S_VLDL_TG	rs883863	A	G	0.308022	Triglycerides in small VLDL || id:met-d-S_VLDL_TG	TRUE	reported	igd
64	11	116648917	-0.239727	0.00590664	1e-200	NA	met-d-S_VLDL_TG	rs964184	C	G	0.867255	Triglycerides in small VLDL || id:met-d-S_VLDL_TG	TRUE	reported	igd
65	11	61606642	0.0394388	0.00418858	9.2e-22	NA	met-d-S_VLDL_TG	rs174580	G	A	0.351967	Triglycerides in small VLDL || id:met-d-S_VLDL_TG	TRUE	reported	igd
66	11	63862882	0.0549515	0.0087996	5.8e-10	NA	met-d-S_VLDL_TG	rs11231694	C	G	0.055798	Triglycerides in small VLDL || id:met-d-S_VLDL_TG	TRUE	reported	igd
67	11	116714293	0.295838	0.0211724	7e-49	NA	met-d-S_VLDL_TG	rs141469619	G	A	0.010141	Triglycerides in small VLDL || id:met-d-S_VLDL_TG	TRUE	reported	igd
68	11	14276999	-0.0365663	0.00638888	2.4e-09	NA	met-d-S_VLDL_TG	rs2303975	A	G	0.111763	Triglycerides in small VLDL || id:met-d-S_VLDL_TG	TRUE	reported	igd
69	12	124409502	-0.0321172	0.00429964	2.6e-15	NA	met-d-S_VLDL_TG	rs7133378	A	G	0.319792	Triglycerides in small VLDL || id:met-d-S_VLDL_TG	TRUE	reported	igd
70	12	107413964	-0.0238475	0.00426105	1.2e-08	NA	met-d-S_VLDL_TG	rs5800723	C	CA	0.534558	Triglycerides in small VLDL || id:met-d-S_VLDL_TG	TRUE	reported	igd
71	12	57650599	0.0352359	0.00527723	3.5e-11	NA	met-d-S_VLDL_TG	rs10649122	A	ATCTC	0.817537	Triglycerides in small VLDL || id:met-d-S_VLDL_TG	TRUE	reported	igd
72	12	4384844	-0.093924	0.0155974	1.2e-09	NA	met-d-S_VLDL_TG	rs76895963	G	T	0.020556	Triglycerides in small VLDL || id:met-d-S_VLDL_TG	TRUE	reported	igd
73	13	114547372	0.0262987	0.00417632	9.4e-11	NA	met-d-S_VLDL_TG	rs6602911	T	C	0.360032	Triglycerides in small VLDL || id:met-d-S_VLDL_TG	TRUE	reported	igd
74	15	58678720	-0.0709468	0.00422665	2.9e-65	NA	met-d-S_VLDL_TG	rs261290	C	T	0.654642	Triglycerides in small VLDL || id:met-d-S_VLDL_TG	TRUE	reported	igd
75	15	43726625	0.170756	0.0126847	1.5e-43	NA	met-d-S_VLDL_TG	rs150844304	C	A	0.025676	Triglycerides in small VLDL || id:met-d-S_VLDL_TG	TRUE	reported	igd
76	15	58577163	-0.0339387	0.00494996	1.6e-11	NA	met-d-S_VLDL_TG	rs10162642	A	G	0.21011	Triglycerides in small VLDL || id:met-d-S_VLDL_TG	TRUE	reported	igd
77	15	58737341	-0.0669148	0.00575041	4.1e-31	NA	met-d-S_VLDL_TG	rs473224	G	T	0.853922	Triglycerides in small VLDL || id:met-d-S_VLDL_TG	TRUE	reported	igd
78	16	72096227	0.0390964	0.00661857	7.4e-10	NA	met-d-S_VLDL_TG	rs34682685	A	G	0.103445	Triglycerides in small VLDL || id:met-d-S_VLDL_TG	TRUE	reported	igd
79	16	81534790	-0.0375013	0.00437054	1.4e-18	NA	met-d-S_VLDL_TG	rs2925979	C	T	0.69893	Triglycerides in small VLDL || id:met-d-S_VLDL_TG	TRUE	reported	igd
80	16	56989590	-0.0297588	0.00428837	1.6e-12	NA	met-d-S_VLDL_TG	rs247616	T	C	0.32471	Triglycerides in small VLDL || id:met-d-S_VLDL_TG	TRUE	reported	igd
81	17	17538289	0.0519898	0.00871879	4.6e-09	NA	met-d-S_VLDL_TG	rs75634664	G	C	0.060203	Triglycerides in small VLDL || id:met-d-S_VLDL_TG	TRUE	reported	igd
82	17	76397343	-0.0231209	0.00410555	1.8e-08	NA	met-d-S_VLDL_TG	rs12451791	A	G	0.603704	Triglycerides in small VLDL || id:met-d-S_VLDL_TG	TRUE	reported	igd
83	17	41926126	0.13322	0.0114841	4.2e-32	NA	met-d-S_VLDL_TG	rs72836561	T	C	0.031483	Triglycerides in small VLDL || id:met-d-S_VLDL_TG	TRUE	reported	igd
84	17	65825374	0.0324886	0.00513989	4.4e-10	NA	met-d-S_VLDL_TG	rs12601919	G	A	0.188897	Triglycerides in small VLDL || id:met-d-S_VLDL_TG	TRUE	reported	igd
85	17	40989002	0.0577619	0.0108611	3.7e-08	NA	met-d-S_VLDL_TG	rs56017239	G	A	0.036381	Triglycerides in small VLDL || id:met-d-S_VLDL_TG	TRUE	reported	igd
86	17	17434141	0.0532751	0.00830776	1.2e-10	NA	met-d-S_VLDL_TG	rs9889584	A	G	0.062205	Triglycerides in small VLDL || id:met-d-S_VLDL_TG	TRUE	reported	igd
87	19	19379549	-0.0971872	0.00764228	1.9e-38	NA	met-d-S_VLDL_TG	rs58542926	T	C	0.074402	Triglycerides in small VLDL || id:met-d-S_VLDL_TG	TRUE	reported	igd
88	19	45430280	0.0744573	0.00431013	1.2e-69	NA	met-d-S_VLDL_TG	rs5112	G	C	0.533746	Triglycerides in small VLDL || id:met-d-S_VLDL_TG	TRUE	reported	igd
89	19	8429323	-0.263198	0.0143769	1.2e-76	NA	met-d-S_VLDL_TG	rs116843064	A	G	0.019852	Triglycerides in small VLDL || id:met-d-S_VLDL_TG	TRUE	reported	igd
90	19	45418790	0.0594989	0.00473344	1.8e-37	NA	met-d-S_VLDL_TG	rs5117	C	T	0.235616	Triglycerides in small VLDL || id:met-d-S_VLDL_TG	TRUE	reported	igd
91	19	8429066	-0.0614732	0.00869623	1.3e-12	NA	met-d-S_VLDL_TG	rs35137994	T	C	0.056405	Triglycerides in small VLDL || id:met-d-S_VLDL_TG	TRUE	reported	igd
92	20	44576502	0.0583107	0.00515986	9.1e-32	NA	met-d-S_VLDL_TG	rs7679	C	T	0.186404	Triglycerides in small VLDL || id:met-d-S_VLDL_TG	TRUE	reported	igd
93	20	62711459	-0.022626	0.0040164	1.9e-08	NA	met-d-S_VLDL_TG	rs8126001	T	C	0.488474	Triglycerides in small VLDL || id:met-d-S_VLDL_TG	TRUE	reported	igd
94	20	39185278	-0.0241052	0.00433939	3.6e-09	NA	met-d-S_VLDL_TG	rs6129629	A	G	0.323161	Triglycerides in small VLDL || id:met-d-S_VLDL_TG	TRUE	reported	igd
95	21	40569508	0.0227749	0.00415693	2.4e-09	NA	met-d-S_VLDL_TG	rs62222988	C	T	0.373877	Triglycerides in small VLDL || id:met-d-S_VLDL_TG	TRUE	reported	igd
96	1	219618564	0.0303749	0.00531361	9.7e-09	NA	met-d-L_HDL_TG_pct	rs61838776	A	C	0.161115	Triglycerides to total lipids ratio in large HDL || id:met-d-L_HDL_TG_pct	TRUE	reported	igd
97	1	40083641	0.0253745	0.00473806	2.5e-08	NA	met-d-L_HDL_TG_pct	rs61781392	A	C	0.216726	Triglycerides to total lipids ratio in large HDL || id:met-d-L_HDL_TG_pct	TRUE	reported	igd
98	1	62996046	0.0666661	0.00407513	5.4e-62	NA	met-d-L_HDL_TG_pct	rs1168015	G	C	0.647604	Triglycerides to total lipids ratio in large HDL || id:met-d-L_HDL_TG_pct	TRUE	reported	igd
99	1	230302838	0.0347614	0.00404499	6.2e-19	NA	met-d-L_HDL_TG_pct	rs59484402	C	CT	0.388312	Triglycerides to total lipids ratio in large HDL || id:met-d-L_HDL_TG_pct	TRUE	reported	igd
100	1	27284913	0.107484	0.0129457	1.1e-16	NA	met-d-L_HDL_TG_pct	rs79598313	T	C	0.023202	Triglycerides to total lipids ratio in large HDL || id:met-d-L_HDL_TG_pct	TRUE	reported	igd
101	1	182119332	0.0243844	0.00417391	1.3e-09	NA	met-d-L_HDL_TG_pct	rs6694102	A	G	0.320937	Triglycerides to total lipids ratio in large HDL || id:met-d-L_HDL_TG_pct	TRUE	reported	igd
102	2	165528624	-0.0445651	0.00399363	3.2e-30	NA	met-d-L_HDL_TG_pct	rs1128249	T	G	0.391999	Triglycerides to total lipids ratio in large HDL || id:met-d-L_HDL_TG_pct	TRUE	reported	igd
103	2	227105921	0.0433509	0.00406592	1.4e-27	NA	met-d-L_HDL_TG_pct	rs2943650	T	C	0.644755	Triglycerides to total lipids ratio in large HDL || id:met-d-L_HDL_TG_pct	TRUE	reported	igd
104	2	219859171	0.0659084	0.0103356	7.6e-10	NA	met-d-L_HDL_TG_pct	rs113414093	A	G	0.047263	Triglycerides to total lipids ratio in large HDL || id:met-d-L_HDL_TG_pct	TRUE	reported	igd
105	2	27730940	-0.0718339	0.0039836	3e-76	NA	met-d-L_HDL_TG_pct	rs1260326	C	T	0.603982	Triglycerides to total lipids ratio in large HDL || id:met-d-L_HDL_TG_pct	TRUE	reported	igd
106	2	21221035	0.0815061	0.00479514	3.5e-66	NA	met-d-L_HDL_TG_pct	rs4665710	C	A	0.79259	Triglycerides to total lipids ratio in large HDL || id:met-d-L_HDL_TG_pct	TRUE	reported	igd
107	3	150066540	0.0466323	0.00837437	1.2e-09	NA	met-d-L_HDL_TG_pct	rs62271373	A	T	0.059943	Triglycerides to total lipids ratio in large HDL || id:met-d-L_HDL_TG_pct	TRUE	reported	igd
108	3	135880410	-0.0335884	0.00497059	3.6e-12	NA	met-d-L_HDL_TG_pct	rs9647335	T	A	0.19201	Triglycerides to total lipids ratio in large HDL || id:met-d-L_HDL_TG_pct	TRUE	reported	igd
109	4	87985166	0.0310819	0.0039977	7.5e-17	NA	met-d-L_HDL_TG_pct	rs3775228	T	C	0.398292	Triglycerides to total lipids ratio in large HDL || id:met-d-L_HDL_TG_pct	TRUE	reported	igd
110	4	89704367	0.0250448	0.00400752	1.1e-09	NA	met-d-L_HDL_TG_pct	rs13118477	A	G	0.390377	Triglycerides to total lipids ratio in large HDL || id:met-d-L_HDL_TG_pct	TRUE	reported	igd
111	4	171555533	-0.0267794	0.00457814	7.1e-10	NA	met-d-L_HDL_TG_pct	rs78795332	G	C	0.239493	Triglycerides to total lipids ratio in large HDL || id:met-d-L_HDL_TG_pct	TRUE	reported	igd
112	4	15106036	0.0208125	0.00414229	4.7e-08	NA	met-d-L_HDL_TG_pct	rs3857142	T	C	0.663407	Triglycerides to total lipids ratio in large HDL || id:met-d-L_HDL_TG_pct	TRUE	reported	igd
113	4	3443931	-0.0278769	0.00403751	2e-12	NA	met-d-L_HDL_TG_pct	rs13108218	G	A	0.615355	Triglycerides to total lipids ratio in large HDL || id:met-d-L_HDL_TG_pct	TRUE	reported	igd
114	4	103188709	0.0466483	0.00743589	1.6e-10	NA	met-d-L_HDL_TG_pct	rs13107325	T	C	0.074284	Triglycerides to total lipids ratio in large HDL || id:met-d-L_HDL_TG_pct	TRUE	reported	igd
115	5	176750688	0.0247153	0.00469516	1.3e-08	NA	met-d-L_HDL_TG_pct	rs62397245	G	C	0.223122	Triglycerides to total lipids ratio in large HDL || id:met-d-L_HDL_TG_pct	TRUE	reported	igd
116	5	67714246	0.0198442	0.00403578	2.3e-08	NA	met-d-L_HDL_TG_pct	rs4976033	G	A	0.40197	Triglycerides to total lipids ratio in large HDL || id:met-d-L_HDL_TG_pct	TRUE	reported	igd
117	5	55857025	-0.0537441	0.00497135	5.3e-28	NA	met-d-L_HDL_TG_pct	rs11429307	G	GT	0.808481	Triglycerides to total lipids ratio in large HDL || id:met-d-L_HDL_TG_pct	TRUE	reported	igd
118	5	57610069	-0.0218046	0.00400668	9.1e-09	NA	met-d-L_HDL_TG_pct	rs37538	C	G	0.602796	Triglycerides to total lipids ratio in large HDL || id:met-d-L_HDL_TG_pct	TRUE	reported	igd
119	6	43757896	0.0392188	0.00390503	3.1e-25	NA	met-d-L_HDL_TG_pct	rs998584	A	C	0.482334	Triglycerides to total lipids ratio in large HDL || id:met-d-L_HDL_TG_pct	TRUE	reported	igd
120	6	161005389	0.0803914	0.00634508	3.7e-40	NA	met-d-L_HDL_TG_pct	rs191555775	T	A	0.106388	Triglycerides to total lipids ratio in large HDL || id:met-d-L_HDL_TG_pct	TRUE	reported	igd
121	6	139835689	-0.0338933	0.00395996	5.8e-18	NA	met-d-L_HDL_TG_pct	rs668459	T	C	0.590334	Triglycerides to total lipids ratio in large HDL || id:met-d-L_HDL_TG_pct	TRUE	reported	igd
122	6	127455029	0.030392	0.00391354	1.2e-16	NA	met-d-L_HDL_TG_pct	rs2186037	G	A	0.51879	Triglycerides to total lipids ratio in large HDL || id:met-d-L_HDL_TG_pct	TRUE	reported	igd
123	6	160751531	-0.119061	0.0154364	9.3e-15	NA	met-d-L_HDL_TG_pct	rs9295128	T	G	0.016821	Triglycerides to total lipids ratio in large HDL || id:met-d-L_HDL_TG_pct	TRUE	reported	igd
124	6	160543148	0.0490365	0.00766998	1.8e-11	NA	met-d-L_HDL_TG_pct	rs12208357	T	C	0.069998	Triglycerides to total lipids ratio in large HDL || id:met-d-L_HDL_TG_pct	TRUE	reported	igd
125	6	31296416	0.02491	0.0045985	2.4e-08	NA	met-d-L_HDL_TG_pct	rs115168686	G	C	0.308966	Triglycerides to total lipids ratio in large HDL || id:met-d-L_HDL_TG_pct	TRUE	reported	igd
126	6	32587213	0.0280045	0.00402361	5.2e-13	NA	met-d-L_HDL_TG_pct	rs28383314	C	T	0.62295	Triglycerides to total lipids ratio in large HDL || id:met-d-L_HDL_TG_pct	TRUE	reported	igd
127	7	73037956	-0.102392	0.00571635	2.9e-73	NA	met-d-L_HDL_TG_pct	rs34060476	G	A	0.134803	Triglycerides to total lipids ratio in large HDL || id:met-d-L_HDL_TG_pct	TRUE	reported	igd
128	7	73123473	0.0693444	0.00905303	8.5e-15	NA	met-d-L_HDL_TG_pct	rs72555385	G	A	0.04931	Triglycerides to total lipids ratio in large HDL || id:met-d-L_HDL_TG_pct	TRUE	reported	igd
129	7	130433594	0.0304083	0.00421011	3.4e-13	NA	met-d-L_HDL_TG_pct	rs11976955	G	C	0.314213	Triglycerides to total lipids ratio in large HDL || id:met-d-L_HDL_TG_pct	TRUE	reported	igd
130	7	25983400	-0.0255079	0.00407467	1.4e-11	NA	met-d-L_HDL_TG_pct	rs56001710	T	A	0.58058	Triglycerides to total lipids ratio in large HDL || id:met-d-L_HDL_TG_pct	TRUE	reported	igd
131	8	9173358	-0.0395648	0.00392437	2.7e-23	NA	met-d-L_HDL_TG_pct	rs7012814	A	G	0.474255	Triglycerides to total lipids ratio in large HDL || id:met-d-L_HDL_TG_pct	TRUE	reported	igd
132	8	19980272	0.0535202	0.00765897	2.3e-11	NA	met-d-L_HDL_TG_pct	rs71205961	C	CTTTTTT	0.0889719	Triglycerides to total lipids ratio in large HDL || id:met-d-L_HDL_TG_pct	TRUE	reported	igd
133	8	18248661	0.0355905	0.00503443	6.8e-14	NA	met-d-L_HDL_TG_pct	rs4646246	G	A	0.182595	Triglycerides to total lipids ratio in large HDL || id:met-d-L_HDL_TG_pct	TRUE	reported	igd
134	8	19819724	-0.208806	0.00646163	1e-200	NA	met-d-L_HDL_TG_pct	rs328	G	C	0.10031	Triglycerides to total lipids ratio in large HDL || id:met-d-L_HDL_TG_pct	TRUE	reported	igd
135	8	126500031	-0.0746433	0.00398944	3.1e-82	NA	met-d-L_HDL_TG_pct	rs28601761	G	C	0.420164	Triglycerides to total lipids ratio in large HDL || id:met-d-L_HDL_TG_pct	TRUE	reported	igd
136	8	19733244	-0.0706301	0.0047468	1e-49	NA	met-d-L_HDL_TG_pct	rs1561748	C	G	0.267457	Triglycerides to total lipids ratio in large HDL || id:met-d-L_HDL_TG_pct	TRUE	reported	igd
137	8	126629700	0.0386162	0.0047802	4.3e-16	NA	met-d-L_HDL_TG_pct	rs7005453	A	G	0.211242	Triglycerides to total lipids ratio in large HDL || id:met-d-L_HDL_TG_pct	TRUE	reported	igd
138	9	136155000	0.0257617	0.00505771	8.8e-09	NA	met-d-L_HDL_TG_pct	rs635634	T	C	0.183549	Triglycerides to total lipids ratio in large HDL || id:met-d-L_HDL_TG_pct	TRUE	reported	igd
139	10	115797947	-0.0343071	0.00581848	3.4e-09	NA	met-d-L_HDL_TG_pct	rs72823020	A	T	0.130419	Triglycerides to total lipids ratio in large HDL || id:met-d-L_HDL_TG_pct	TRUE	reported	igd
140	10	99778226	0.0207953	0.00392219	4.1e-08	NA	met-d-L_HDL_TG_pct	rs2439823	G	A	0.545733	Triglycerides to total lipids ratio in large HDL || id:met-d-L_HDL_TG_pct	TRUE	reported	igd
141	10	94842213	-0.0254871	0.00391591	1.7e-10	NA	met-d-L_HDL_TG_pct	rs10882140	T	G	0.533406	Triglycerides to total lipids ratio in large HDL || id:met-d-L_HDL_TG_pct	TRUE	reported	igd
142	11	14427402	-0.0297919	0.00560679	6.1e-09	NA	met-d-L_HDL_TG_pct	rs76613195	A	C	0.143631	Triglycerides to total lipids ratio in large HDL || id:met-d-L_HDL_TG_pct	TRUE	reported	igd
143	11	116648917	-0.207482	0.00574374	1e-200	NA	met-d-L_HDL_TG_pct	rs964184	C	G	0.867255	Triglycerides to total lipids ratio in large HDL || id:met-d-L_HDL_TG_pct	TRUE	reported	igd
144	11	47253244	-0.0413944	0.00535344	1.2e-14	NA	met-d-L_HDL_TG_pct	rs4647737	G	T	0.156774	Triglycerides to total lipids ratio in large HDL || id:met-d-L_HDL_TG_pct	TRUE	reported	igd
145	11	64021821	0.048	0.00689312	4.2e-12	NA	met-d-L_HDL_TG_pct	rs2302263	T	C	0.088118	Triglycerides to total lipids ratio in large HDL || id:met-d-L_HDL_TG_pct	TRUE	reported	igd
146	11	61606642	0.0794623	0.00407307	9.2e-90	NA	met-d-L_HDL_TG_pct	rs174580	G	A	0.351967	Triglycerides to total lipids ratio in large HDL || id:met-d-L_HDL_TG_pct	TRUE	reported	igd
147	11	116916060	0.248649	0.0197271	4.1e-40	NA	met-d-L_HDL_TG_pct	rs144018203	C	G	0.010654	Triglycerides to total lipids ratio in large HDL || id:met-d-L_HDL_TG_pct	TRUE	reported	igd
148	11	117156893	-0.227879	0.0198213	5.3e-30	NA	met-d-L_HDL_TG_pct	rs1047964	T	G	0.010073	Triglycerides to total lipids ratio in large HDL || id:met-d-L_HDL_TG_pct	TRUE	reported	igd
149	12	124409502	-0.0331514	0.0041821	3.5e-17	NA	met-d-L_HDL_TG_pct	rs7133378	A	G	0.319792	Triglycerides to total lipids ratio in large HDL || id:met-d-L_HDL_TG_pct	TRUE	reported	igd
150	12	57692470	-0.0309137	0.00456119	2.1e-12	NA	met-d-L_HDL_TG_pct	rs12313762	T	C	0.238662	Triglycerides to total lipids ratio in large HDL || id:met-d-L_HDL_TG_pct	TRUE	reported	igd
151	12	20473758	-0.0254065	0.00393165	3.1e-10	NA	met-d-L_HDL_TG_pct	rs7134375	A	C	0.430204	Triglycerides to total lipids ratio in large HDL || id:met-d-L_HDL_TG_pct	TRUE	reported	igd
152	12	125350975	-0.0261151	0.00406592	2.8e-10	NA	met-d-L_HDL_TG_pct	rs12827729	G	A	0.359582	Triglycerides to total lipids ratio in large HDL || id:met-d-L_HDL_TG_pct	TRUE	reported	igd
153	12	111910219	-0.0212364	0.00390455	1.8e-09	NA	met-d-L_HDL_TG_pct	rs10774625	G	A	0.502837	Triglycerides to total lipids ratio in large HDL || id:met-d-L_HDL_TG_pct	TRUE	reported	igd
154	12	123186381	-0.0288108	0.00486708	2.8e-09	NA	met-d-L_HDL_TG_pct	rs492699	C	T	0.2248	Triglycerides to total lipids ratio in large HDL || id:met-d-L_HDL_TG_pct	TRUE	reported	igd
155	15	43726625	0.126827	0.0123395	1.6e-25	NA	met-d-L_HDL_TG_pct	rs150844304	C	A	0.025676	Triglycerides to total lipids ratio in large HDL || id:met-d-L_HDL_TG_pct	TRUE	reported	igd
156	15	58678720	-0.0703753	0.00411163	2.2e-68	NA	met-d-L_HDL_TG_pct	rs261290	C	T	0.654642	Triglycerides to total lipids ratio in large HDL || id:met-d-L_HDL_TG_pct	TRUE	reported	igd
157	15	58577163	-0.033456	0.00481527	3e-11	NA	met-d-L_HDL_TG_pct	rs10162642	A	G	0.21011	Triglycerides to total lipids ratio in large HDL || id:met-d-L_HDL_TG_pct	TRUE	reported	igd
158	15	58737341	-0.0690813	0.00559393	3.4e-36	NA	met-d-L_HDL_TG_pct	rs473224	G	T	0.853922	Triglycerides to total lipids ratio in large HDL || id:met-d-L_HDL_TG_pct	TRUE	reported	igd
159	16	56993886	-0.180705	0.00415887	1e-200	NA	met-d-L_HDL_TG_pct	rs821840	G	A	0.324538	Triglycerides to total lipids ratio in large HDL || id:met-d-L_HDL_TG_pct	TRUE	reported	igd
160	16	67506247	-0.0906363	0.0104788	8.6e-19	NA	met-d-L_HDL_TG_pct	rs8044652	C	T	0.962947	Triglycerides to total lipids ratio in large HDL || id:met-d-L_HDL_TG_pct	TRUE	reported	igd
161	16	56946502	0.138159	0.0246055	2.8e-09	NA	met-d-L_HDL_TG_pct	rs117738782	C	T	0.007457	Triglycerides to total lipids ratio in large HDL || id:met-d-L_HDL_TG_pct	TRUE	reported	igd
162	16	57049137	0.135829	0.0114759	1.7e-32	NA	met-d-L_HDL_TG_pct	rs75911530	A	G	0.032886	Triglycerides to total lipids ratio in large HDL || id:met-d-L_HDL_TG_pct	TRUE	reported	igd
163	16	15172118	-0.0250317	0.00427372	4.3e-10	NA	met-d-L_HDL_TG_pct	rs11644601	C	T	0.296692	Triglycerides to total lipids ratio in large HDL || id:met-d-L_HDL_TG_pct	TRUE	reported	igd
164	16	81534790	-0.0401477	0.00423918	4.3e-22	NA	met-d-L_HDL_TG_pct	rs2925979	C	T	0.69893	Triglycerides to total lipids ratio in large HDL || id:met-d-L_HDL_TG_pct	TRUE	reported	igd
165	17	17647770	0.0530448	0.00818834	1.7e-10	NA	met-d-L_HDL_TG_pct	rs76381434	G	A	0.06088	Triglycerides to total lipids ratio in large HDL || id:met-d-L_HDL_TG_pct	TRUE	reported	igd
166	17	65825374	0.0301442	0.00499999	1.6e-09	NA	met-d-L_HDL_TG_pct	rs12601919	G	A	0.188897	Triglycerides to total lipids ratio in large HDL || id:met-d-L_HDL_TG_pct	TRUE	reported	igd
167	17	41926126	0.163887	0.0111716	2.6e-52	NA	met-d-L_HDL_TG_pct	rs72836561	T	C	0.031483	Triglycerides to total lipids ratio in large HDL || id:met-d-L_HDL_TG_pct	TRUE	reported	igd
168	17	76406084	-0.0234376	0.00399991	1.2e-09	NA	met-d-L_HDL_TG_pct	rs4969144	A	C	0.52108	Triglycerides to total lipids ratio in large HDL || id:met-d-L_HDL_TG_pct	TRUE	reported	igd
169	19	45413233	0.236205	0.0071902	1e-200	NA	met-d-L_HDL_TG_pct	rs1065853	T	G	0.080584	Triglycerides to total lipids ratio in large HDL || id:met-d-L_HDL_TG_pct	TRUE	reported	igd
170	19	8429323	-0.299251	0.0139803	1.3e-105	NA	met-d-L_HDL_TG_pct	rs116843064	A	G	0.019852	Triglycerides to total lipids ratio in large HDL || id:met-d-L_HDL_TG_pct	TRUE	reported	igd
171	19	45389224	0.0434259	0.00726864	9.8e-09	NA	met-d-L_HDL_TG_pct	rs283814	G	A	0.922418	Triglycerides to total lipids ratio in large HDL || id:met-d-L_HDL_TG_pct	TRUE	reported	igd
172	19	8601051	0.0361204	0.00582838	2.2e-09	NA	met-d-L_HDL_TG_pct	rs57614495	G	GTC	0.867968	Triglycerides to total lipids ratio in large HDL || id:met-d-L_HDL_TG_pct	TRUE	reported	igd
173	19	19379549	-0.0459648	0.0074315	4.1e-09	NA	met-d-L_HDL_TG_pct	rs58542926	T	C	0.074402	Triglycerides to total lipids ratio in large HDL || id:met-d-L_HDL_TG_pct	TRUE	reported	igd
174	19	8456738	-0.0647787	0.011292	6e-09	NA	met-d-L_HDL_TG_pct	rs116483979	T	C	0.031389	Triglycerides to total lipids ratio in large HDL || id:met-d-L_HDL_TG_pct	TRUE	reported	igd
175	20	44551855	0.1175	0.0048958	1.7e-132	NA	met-d-L_HDL_TG_pct	rs6073958	C	T	0.198725	Triglycerides to total lipids ratio in large HDL || id:met-d-L_HDL_TG_pct	TRUE	reported	igd
176	20	39174140	-0.0289307	0.00428167	3.2e-12	NA	met-d-L_HDL_TG_pct	rs1883715	T	C	0.312619	Triglycerides to total lipids ratio in large HDL || id:met-d-L_HDL_TG_pct	TRUE	reported	igd
177	20	62711459	-0.022015	0.00390622	1.1e-08	NA	met-d-L_HDL_TG_pct	rs8126001	T	C	0.488474	Triglycerides to total lipids ratio in large HDL || id:met-d-L_HDL_TG_pct	TRUE	reported	igd
178	22	38601231	0.0227745	0.00396917	7.3e-09	NA	met-d-L_HDL_TG_pct	rs2267375	T	G	0.58062	Triglycerides to total lipids ratio in large HDL || id:met-d-L_HDL_TG_pct	TRUE	reported	igd
179	1	109615481	-0.0335938	0.00587732	2.4e-08	NA	met-d-XL_VLDL_L	rs72986845	C	A	0.13555	Total lipids in very large VLDL || id:met-d-XL_VLDL_L	TRUE	reported	igd
180	1	230302838	0.0449315	0.0041224	1.1e-28	NA	met-d-XL_VLDL_L	rs59484402	C	CT	0.388312	Total lipids in very large VLDL || id:met-d-XL_VLDL_L	TRUE	reported	igd
181	1	27284913	0.10707	0.0131934	1.6e-15	NA	met-d-XL_VLDL_L	rs79598313	T	C	0.023202	Total lipids in very large VLDL || id:met-d-XL_VLDL_L	TRUE	reported	igd
182	1	63060037	0.0745995	0.00415704	1.2e-74	NA	met-d-XL_VLDL_L	rs79439217	T	TAAGAA	0.647276	Total lipids in very large VLDL || id:met-d-XL_VLDL_L	TRUE	reported	igd
183	2	21530659	-0.0244012	0.00405515	3.4e-09	NA	met-d-XL_VLDL_L	rs60960031	A	G	0.402844	Total lipids in very large VLDL || id:met-d-XL_VLDL_L	TRUE	reported	igd
184	2	165528876	-0.0506019	0.00406783	3.4e-37	NA	met-d-XL_VLDL_L	rs13389219	T	C	0.392528	Total lipids in very large VLDL || id:met-d-XL_VLDL_L	TRUE	reported	igd
185	2	219699999	0.0651728	0.0102825	5.9e-11	NA	met-d-XL_VLDL_L	rs78058190	A	G	0.0501	Total lipids in very large VLDL || id:met-d-XL_VLDL_L	TRUE	reported	igd
186	2	227104111	0.0393351	0.00415674	1.7e-21	NA	met-d-XL_VLDL_L	rs2972140	C	T	0.650638	Total lipids in very large VLDL || id:met-d-XL_VLDL_L	TRUE	reported	igd
187	2	27730940	-0.0908715	0.0040588	2.2e-115	NA	met-d-XL_VLDL_L	rs1260326	C	T	0.603982	Total lipids in very large VLDL || id:met-d-XL_VLDL_L	TRUE	reported	igd
188	2	25592918	-0.023541	0.00428185	4.5e-08	NA	met-d-XL_VLDL_L	rs11903847	C	T	0.665068	Total lipids in very large VLDL || id:met-d-XL_VLDL_L	TRUE	reported	igd
189	2	21231524	-0.0982262	0.00489677	1.3e-91	NA	met-d-XL_VLDL_L	rs676210	A	G	0.205765	Total lipids in very large VLDL || id:met-d-XL_VLDL_L	TRUE	reported	igd
190	3	135956305	0.0353084	0.00470455	6.3e-15	NA	met-d-XL_VLDL_L	rs684773	C	A	0.767067	Total lipids in very large VLDL || id:met-d-XL_VLDL_L	TRUE	reported	igd
191	3	150097635	0.0414526	0.00788678	1.5e-08	NA	met-d-XL_VLDL_L	rs9844972	C	G	0.070765	Total lipids in very large VLDL || id:met-d-XL_VLDL_L	TRUE	reported	igd
192	3	52838654	-0.0353362	0.00609254	1.5e-08	NA	met-d-XL_VLDL_L	rs9968117	T	C	0.120934	Total lipids in very large VLDL || id:met-d-XL_VLDL_L	TRUE	reported	igd
193	4	3443931	-0.0337987	0.0041145	1.5e-17	NA	met-d-XL_VLDL_L	rs13108218	G	A	0.615355	Total lipids in very large VLDL || id:met-d-XL_VLDL_L	TRUE	reported	igd
194	4	15105312	0.0226731	0.00422103	3.2e-08	NA	met-d-XL_VLDL_L	rs4698315	C	G	0.66337	Total lipids in very large VLDL || id:met-d-XL_VLDL_L	TRUE	reported	igd
195	4	87976359	0.0319626	0.00407884	3e-16	NA	met-d-XL_VLDL_L	rs1471251	T	A	0.397126	Total lipids in very large VLDL || id:met-d-XL_VLDL_L	TRUE	reported	igd
196	4	171563776	-0.0271322	0.00467588	1.4e-09	NA	met-d-XL_VLDL_L	rs4491981	A	C	0.241217	Total lipids in very large VLDL || id:met-d-XL_VLDL_L	TRUE	reported	igd
197	5	67513457	-0.0269446	0.00495672	1.5e-08	NA	met-d-XL_VLDL_L	rs13186403	T	G	0.215247	Total lipids in very large VLDL || id:met-d-XL_VLDL_L	TRUE	reported	igd
198	5	156443066	0.0366606	0.0041461	2.3e-20	NA	met-d-XL_VLDL_L	rs4704834	G	A	0.644037	Total lipids in very large VLDL || id:met-d-XL_VLDL_L	TRUE	reported	igd
199	5	55857025	-0.0566607	0.00506555	6.6e-29	NA	met-d-XL_VLDL_L	rs11429307	G	GT	0.808481	Total lipids in very large VLDL || id:met-d-XL_VLDL_L	TRUE	reported	igd
200	6	32586831	0.0418357	0.00427704	2.9e-22	NA	met-d-XL_VLDL_L	rs13191810	T	C	0.312294	Total lipids in very large VLDL || id:met-d-XL_VLDL_L	TRUE	reported	igd
201	6	139834012	-0.0354613	0.00410486	4.6e-18	NA	met-d-XL_VLDL_L	rs632057	G	T	0.627779	Total lipids in very large VLDL || id:met-d-XL_VLDL_L	TRUE	reported	igd
202	6	43757896	0.0322766	0.00397293	3.1e-16	NA	met-d-XL_VLDL_L	rs998584	A	C	0.482334	Total lipids in very large VLDL || id:met-d-XL_VLDL_L	TRUE	reported	igd
203	6	161017363	-0.105817	0.0110477	2.8e-21	NA	met-d-XL_VLDL_L	rs73596816	A	G	0.033595	Total lipids in very large VLDL || id:met-d-XL_VLDL_L	TRUE	reported	igd
204	6	32623528	0.0356004	0.00586477	1.1e-10	NA	met-d-XL_VLDL_L	rs73732214	A	G	0.140432	Total lipids in very large VLDL || id:met-d-XL_VLDL_L	TRUE	reported	igd
205	6	160710851	-0.0305343	0.0054566	2.5e-08	NA	met-d-XL_VLDL_L	rs3127580	T	C	0.156206	Total lipids in very large VLDL || id:met-d-XL_VLDL_L	TRUE	reported	igd
206	6	31236679	0.0250072	0.00452655	3.2e-08	NA	met-d-XL_VLDL_L	rs1130580	C	T	0.289862	Total lipids in very large VLDL || id:met-d-XL_VLDL_L	TRUE	reported	igd
207	6	127455029	0.033353	0.00398158	4.5e-18	NA	met-d-XL_VLDL_L	rs2186037	G	A	0.51879	Total lipids in very large VLDL || id:met-d-XL_VLDL_L	TRUE	reported	igd
208	6	160922870	-0.312985	0.0147202	1.2e-100	NA	met-d-XL_VLDL_L	rs117733303	G	A	0.0185	Total lipids in very large VLDL || id:met-d-XL_VLDL_L	TRUE	reported	igd
209	6	161010118	-0.189915	0.00735565	4.5e-150	NA	met-d-XL_VLDL_L	rs10455872	G	A	0.07899	Total lipids in very large VLDL || id:met-d-XL_VLDL_L	TRUE	reported	igd
210	6	160545046	0.0586654	0.00978899	2.7e-10	NA	met-d-XL_VLDL_L	rs111909590	T	C	0.043581	Total lipids in very large VLDL || id:met-d-XL_VLDL_L	TRUE	reported	igd
211	7	73020337	-0.113739	0.00591807	1.3e-81	NA	met-d-XL_VLDL_L	rs3812316	G	C	0.129264	Total lipids in very large VLDL || id:met-d-XL_VLDL_L	TRUE	reported	igd
212	7	73123473	0.0691005	0.0092245	1.1e-13	NA	met-d-XL_VLDL_L	rs72555385	G	A	0.04931	Total lipids in very large VLDL || id:met-d-XL_VLDL_L	TRUE	reported	igd
213	7	130433594	0.0336241	0.00428986	1.9e-15	NA	met-d-XL_VLDL_L	rs11976955	G	C	0.314213	Total lipids in very large VLDL || id:met-d-XL_VLDL_L	TRUE	reported	igd
214	7	25983400	-0.0277901	0.00415185	2.7e-12	NA	met-d-XL_VLDL_L	rs56001710	T	A	0.58058	Total lipids in very large VLDL || id:met-d-XL_VLDL_L	TRUE	reported	igd
215	8	19819724	-0.189019	0.0065901	2.9e-185	NA	met-d-XL_VLDL_L	rs328	G	C	0.10031	Total lipids in very large VLDL || id:met-d-XL_VLDL_L	TRUE	reported	igd
216	8	126500031	-0.0827814	0.00406877	1.6e-96	NA	met-d-XL_VLDL_L	rs28601761	G	C	0.420164	Total lipids in very large VLDL || id:met-d-XL_VLDL_L	TRUE	reported	igd
217	8	11493678	0.0322575	0.00410052	5.5e-15	NA	met-d-XL_VLDL_L	rs13265201	G	C	0.396268	Total lipids in very large VLDL || id:met-d-XL_VLDL_L	TRUE	reported	igd
218	8	59388565	-0.0248855	0.00420519	2.1e-09	NA	met-d-XL_VLDL_L	rs2081687	C	T	0.663094	Total lipids in very large VLDL || id:met-d-XL_VLDL_L	TRUE	reported	igd
219	8	126631799	0.0337537	0.0048772	1e-12	NA	met-d-XL_VLDL_L	rs3860847	A	G	0.212511	Total lipids in very large VLDL || id:met-d-XL_VLDL_L	TRUE	reported	igd
220	8	19733244	-0.0633753	0.00484118	9.2e-39	NA	met-d-XL_VLDL_L	rs1561748	C	G	0.267457	Total lipids in very large VLDL || id:met-d-XL_VLDL_L	TRUE	reported	igd
221	8	22882293	-0.023871	0.00427869	3.1e-08	NA	met-d-XL_VLDL_L	rs59296513	A	G	0.320421	Total lipids in very large VLDL || id:met-d-XL_VLDL_L	TRUE	reported	igd
222	10	94797973	-0.0272475	0.00405768	4.9e-13	NA	met-d-XL_VLDL_L	rs2478236	A	G	0.403779	Total lipids in very large VLDL || id:met-d-XL_VLDL_L	TRUE	reported	igd
223	10	64882300	-0.0349669	0.00400591	5.3e-19	NA	met-d-XL_VLDL_L	rs10761716	G	C	0.441499	Total lipids in very large VLDL || id:met-d-XL_VLDL_L	TRUE	reported	igd
224	10	99710001	0.0225456	0.00412887	3.4e-08	NA	met-d-XL_VLDL_L	rs201289443	G	C	0.410222	Total lipids in very large VLDL || id:met-d-XL_VLDL_L	TRUE	reported	igd
225	11	116389017	0.0243375	0.00433765	4.1e-08	NA	met-d-XL_VLDL_L	rs883863	A	G	0.308022	Total lipids in very large VLDL || id:met-d-XL_VLDL_L	TRUE	reported	igd
226	11	116648917	-0.207769	0.00585656	1e-200	NA	met-d-XL_VLDL_L	rs964184	C	G	0.867255	Total lipids in very large VLDL || id:met-d-XL_VLDL_L	TRUE	reported	igd
227	11	116916060	0.26895	0.0201145	4.4e-44	NA	met-d-XL_VLDL_L	rs144018203	C	G	0.010654	Total lipids in very large VLDL || id:met-d-XL_VLDL_L	TRUE	reported	igd
228	11	61575158	0.0518601	0.0041774	9.4e-37	NA	met-d-XL_VLDL_L	rs174553	G	A	0.342553	Total lipids in very large VLDL || id:met-d-XL_VLDL_L	TRUE	reported	igd
229	11	64004643	0.0525573	0.00950064	1.8e-08	NA	met-d-XL_VLDL_L	rs12294913	G	C	0.049059	Total lipids in very large VLDL || id:met-d-XL_VLDL_L	TRUE	reported	igd
230	11	117156893	-0.250057	0.0202107	1.4e-35	NA	met-d-XL_VLDL_L	rs1047964	T	G	0.010073	Total lipids in very large VLDL || id:met-d-XL_VLDL_L	TRUE	reported	igd
231	12	57766392	-0.0306201	0.00464637	2.6e-11	NA	met-d-XL_VLDL_L	rs4760254	C	G	0.239057	Total lipids in very large VLDL || id:met-d-XL_VLDL_L	TRUE	reported	igd
232	12	124409502	-0.0316649	0.00426218	7e-15	NA	met-d-XL_VLDL_L	rs7133378	A	G	0.319792	Total lipids in very large VLDL || id:met-d-XL_VLDL_L	TRUE	reported	igd
233	12	4384844	-0.0838592	0.0154614	2.9e-08	NA	met-d-XL_VLDL_L	rs76895963	G	T	0.020556	Total lipids in very large VLDL || id:met-d-XL_VLDL_L	TRUE	reported	igd
234	13	95231825	0.0232974	0.00415805	8.1e-09	NA	met-d-XL_VLDL_L	rs2275647	A	G	0.351879	Total lipids in very large VLDL || id:met-d-XL_VLDL_L	TRUE	reported	igd
235	13	114544024	0.0276998	0.0043429	3.8e-11	NA	met-d-XL_VLDL_L	rs7140110	C	T	0.299371	Total lipids in very large VLDL || id:met-d-XL_VLDL_L	TRUE	reported	igd
236	15	43726625	0.130282	0.01258	1.5e-26	NA	met-d-XL_VLDL_L	rs150844304	C	A	0.025676	Total lipids in very large VLDL || id:met-d-XL_VLDL_L	TRUE	reported	igd
237	16	15172118	-0.0233248	0.00436756	7.7e-09	NA	met-d-XL_VLDL_L	rs11644601	C	T	0.296692	Total lipids in very large VLDL || id:met-d-XL_VLDL_L	TRUE	reported	igd
238	16	72096227	0.0419129	0.00656061	5.1e-11	NA	met-d-XL_VLDL_L	rs34682685	A	G	0.103445	Total lipids in very large VLDL || id:met-d-XL_VLDL_L	TRUE	reported	igd
239	16	81534790	-0.0337048	0.00433226	2e-15	NA	met-d-XL_VLDL_L	rs2925979	C	T	0.69893	Total lipids in very large VLDL || id:met-d-XL_VLDL_L	TRUE	reported	igd
240	16	56989590	-0.0613952	0.00425082	4.5e-49	NA	met-d-XL_VLDL_L	rs247616	T	C	0.32471	Total lipids in very large VLDL || id:met-d-XL_VLDL_L	TRUE	reported	igd
241	17	17434141	0.0521367	0.00823598	3.5e-10	NA	met-d-XL_VLDL_L	rs9889584	A	G	0.062205	Total lipids in very large VLDL || id:met-d-XL_VLDL_L	TRUE	reported	igd
242	17	17538289	0.0492406	0.00864346	2.6e-08	NA	met-d-XL_VLDL_L	rs75634664	G	C	0.060203	Total lipids in very large VLDL || id:met-d-XL_VLDL_L	TRUE	reported	igd
243	17	41926126	0.119194	0.0113849	1.9e-26	NA	met-d-XL_VLDL_L	rs72836561	T	C	0.031483	Total lipids in very large VLDL || id:met-d-XL_VLDL_L	TRUE	reported	igd
244	17	64210580	-0.100402	0.0115571	1.7e-19	NA	met-d-XL_VLDL_L	rs1801689	C	A	0.030531	Total lipids in very large VLDL || id:met-d-XL_VLDL_L	TRUE	reported	igd
245	19	8429323	-0.227724	0.0142568	2.9e-58	NA	met-d-XL_VLDL_L	rs116843064	A	G	0.019852	Total lipids in very large VLDL || id:met-d-XL_VLDL_L	TRUE	reported	igd
246	19	8423432	0.0535573	0.00869941	3.9e-10	NA	met-d-XL_VLDL_L	rs371786442	A	AT	0.944099	Total lipids in very large VLDL || id:met-d-XL_VLDL_L	TRUE	reported	igd
247	19	19379549	-0.111891	0.00757847	1e-49	NA	met-d-XL_VLDL_L	rs58542926	T	C	0.074402	Total lipids in very large VLDL || id:met-d-XL_VLDL_L	TRUE	reported	igd
248	19	19380513	-0.108009	0.0181306	1.4e-09	NA	met-d-XL_VLDL_L	rs187429064	G	A	0.013452	Total lipids in very large VLDL || id:met-d-XL_VLDL_L	TRUE	reported	igd
249	19	45430280	0.0807887	0.00427414	6.8e-83	NA	met-d-XL_VLDL_L	rs5112	G	C	0.533746	Total lipids in very large VLDL || id:met-d-XL_VLDL_L	TRUE	reported	igd
250	19	45416178	0.0437112	0.00468172	5e-21	NA	met-d-XL_VLDL_L	rs483082	T	G	0.236543	Total lipids in very large VLDL || id:met-d-XL_VLDL_L	TRUE	reported	igd
251	20	39204644	-0.0236921	0.00424529	3.1e-09	NA	met-d-XL_VLDL_L	rs2092479	G	C	0.32623	Total lipids in very large VLDL || id:met-d-XL_VLDL_L	TRUE	reported	igd
252	20	44576502	0.0461579	0.00511536	6.4e-21	NA	met-d-XL_VLDL_L	rs7679	C	T	0.186404	Total lipids in very large VLDL || id:met-d-XL_VLDL_L	TRUE	reported	igd
253	1	62960250	0.079193	0.011709	2.13e-11	19267	met-c-949	rs1168041	C	T	0.727042	Total lipids in very large VLDL || id:met-c-949	TRUE	reported	igd
254	2	27730940	-0.084114	0.010621	4.43e-15	19273	met-c-949	rs1260326	C	T	0.636562	Total lipids in very large VLDL || id:met-c-949	TRUE	reported	igd
255	6	160997118	-0.180214	0.028212	2.53e-10	19266	met-c-949	rs74617384	T	A	0.039885	Total lipids in very large VLDL || id:met-c-949	TRUE	reported	igd
256	7	72915521	-0.105739	0.015889	4.42e-11	19267	met-c-949	rs34482346	C	G	0.120191	Total lipids in very large VLDL || id:met-c-949	TRUE	reported	igd
257	8	19912370	-0.106434	0.017144	7.89e-10	19269	met-c-949	rs115849089	A	G	0.101403	Total lipids in very large VLDL || id:met-c-949	TRUE	reported	igd
258	11	116648917	-0.178243	0.014514	4.95e-34	19271	met-c-949	rs964184	C	G	0.857677	Total lipids in very large VLDL || id:met-c-949	TRUE	reported	igd
259	19	45416178	0.086768	0.012425	4.69e-12	19269	met-c-949	rs483082	T	G	0.22973	Total lipids in very large VLDL || id:met-c-949	TRUE	reported	igd
260	19	19366632	-0.145789	0.021377	1.45e-11	19270	met-c-949	rs72999033	T	C	0.061184	Total lipids in very large VLDL || id:met-c-949	TRUE	reported	igd
261	1	55521109	-0.0312782	0.00417987	1.7e-13	NA	met-d-L_HDL_PL_pct	rs693668	A	G	0.648546	Phospholipids to total lipids ratio in large HDL || id:met-d-L_HDL_PL_pct	TRUE	reported	igd
262	1	25775682	-0.0279841	0.00401353	2.3e-12	NA	met-d-L_HDL_PL_pct	rs12027110	T	A	0.554693	Phospholipids to total lipids ratio in large HDL || id:met-d-L_HDL_PL_pct	TRUE	reported	igd
263	1	62999675	0.0336899	0.00417497	5.2e-16	NA	met-d-L_HDL_PL_pct	rs7534572	G	C	0.647484	Phospholipids to total lipids ratio in large HDL || id:met-d-L_HDL_PL_pct	TRUE	reported	igd
264	1	39656073	-0.0239622	0.00458747	3.2e-08	NA	met-d-L_HDL_PL_pct	rs12076577	T	G	0.734229	Phospholipids to total lipids ratio in large HDL || id:met-d-L_HDL_PL_pct	TRUE	reported	igd
265	1	55505647	0.213926	0.0152204	3.2e-46	NA	met-d-L_HDL_PL_pct	rs11591147	T	G	0.017458	Phospholipids to total lipids ratio in large HDL || id:met-d-L_HDL_PL_pct	TRUE	reported	igd
266	1	109817590	0.0878283	0.0048059	5.8e-76	NA	met-d-L_HDL_PL_pct	rs12740374	T	G	0.221059	Phospholipids to total lipids ratio in large HDL || id:met-d-L_HDL_PL_pct	TRUE	reported	igd
267	1	55492083	0.025471	0.00449593	1.2e-08	NA	met-d-L_HDL_PL_pct	rs59784135	G	A	0.69642	Phospholipids to total lipids ratio in large HDL || id:met-d-L_HDL_PL_pct	TRUE	reported	igd
268	1	150868102	0.0287493	0.00484418	2.5e-09	NA	met-d-L_HDL_PL_pct	rs78132593	A	C	0.217407	Phospholipids to total lipids ratio in large HDL || id:met-d-L_HDL_PL_pct	TRUE	reported	igd
269	1	177933829	0.0239464	0.00398845	3.1e-09	NA	met-d-L_HDL_PL_pct	rs10798586	C	A	0.484054	Phospholipids to total lipids ratio in large HDL || id:met-d-L_HDL_PL_pct	TRUE	reported	igd
270	1	93820684	0.0239049	0.0040847	1.3e-09	NA	met-d-L_HDL_PL_pct	rs6658257	G	A	0.602146	Phospholipids to total lipids ratio in large HDL || id:met-d-L_HDL_PL_pct	TRUE	reported	igd
271	1	161194641	0.0484968	0.00412322	1e-32	NA	met-d-L_HDL_PL_pct	rs4656292	G	A	0.619566	Phospholipids to total lipids ratio in large HDL || id:met-d-L_HDL_PL_pct	TRUE	reported	igd
272	1	234852204	-0.0283453	0.00399291	9e-13	NA	met-d-L_HDL_PL_pct	rs526936	A	G	0.517227	Phospholipids to total lipids ratio in large HDL || id:met-d-L_HDL_PL_pct	TRUE	reported	igd
273	2	44073881	0.04086	0.00427333	1.1e-22	NA	met-d-L_HDL_PL_pct	rs6544713	C	T	0.676267	Phospholipids to total lipids ratio in large HDL || id:met-d-L_HDL_PL_pct	TRUE	reported	igd
274	2	165528876	-0.032652	0.0040918	3.2e-16	NA	met-d-L_HDL_PL_pct	rs13389219	T	C	0.392528	Phospholipids to total lipids ratio in large HDL || id:met-d-L_HDL_PL_pct	TRUE	reported	igd
275	2	27730940	-0.0623291	0.00408272	7.3e-53	NA	met-d-L_HDL_PL_pct	rs1260326	C	T	0.603982	Phospholipids to total lipids ratio in large HDL || id:met-d-L_HDL_PL_pct	TRUE	reported	igd
276	2	111876613	-0.051164	0.00762513	6.2e-11	NA	met-d-L_HDL_PL_pct	rs72836346	C	G	0.078774	Phospholipids to total lipids ratio in large HDL || id:met-d-L_HDL_PL_pct	TRUE	reported	igd
277	2	121310024	-0.0310266	0.00564134	3e-08	NA	met-d-L_HDL_PL_pct	rs34907036	TGAA	T	0.148325	Phospholipids to total lipids ratio in large HDL || id:met-d-L_HDL_PL_pct	TRUE	reported	igd
278	2	21267461	-0.0512519	0.00422388	7.7e-35	NA	met-d-L_HDL_PL_pct	rs934197	A	G	0.3357	Phospholipids to total lipids ratio in large HDL || id:met-d-L_HDL_PL_pct	TRUE	reported	igd
279	2	227112754	0.0348248	0.00416586	7.5e-17	NA	met-d-L_HDL_PL_pct	rs2943654	T	C	0.64513	Phospholipids to total lipids ratio in large HDL || id:met-d-L_HDL_PL_pct	TRUE	reported	igd
280	2	219699999	0.0602784	0.0103431	1.5e-08	NA	met-d-L_HDL_PL_pct	rs78058190	A	G	0.0501	Phospholipids to total lipids ratio in large HDL || id:met-d-L_HDL_PL_pct	TRUE	reported	igd
281	3	12206489	0.124734	0.0165033	9.9e-14	NA	met-d-L_HDL_PL_pct	rs11922042	C	T	0.017208	Phospholipids to total lipids ratio in large HDL || id:met-d-L_HDL_PL_pct	TRUE	reported	igd
282	3	49884261	0.0276923	0.00428806	6.7e-11	NA	met-d-L_HDL_PL_pct	rs9819511	T	C	0.319828	Phospholipids to total lipids ratio in large HDL || id:met-d-L_HDL_PL_pct	TRUE	reported	igd
283	4	88203828	0.0228346	0.00402467	2.1e-09	NA	met-d-L_HDL_PL_pct	rs13150068	G	A	0.437003	Phospholipids to total lipids ratio in large HDL || id:met-d-L_HDL_PL_pct	TRUE	reported	igd
284	4	129111789	-0.120944	0.0217637	2.1e-08	NA	met-d-L_HDL_PL_pct	rs141996530	G	A	0.008685	Phospholipids to total lipids ratio in large HDL || id:met-d-L_HDL_PL_pct	TRUE	reported	igd
285	5	74640490	-0.0464288	0.00413243	5.6e-29	NA	met-d-L_HDL_PL_pct	rs2878419	T	C	0.373525	Phospholipids to total lipids ratio in large HDL || id:met-d-L_HDL_PL_pct	TRUE	reported	igd
286	5	156443066	-0.0259952	0.00417021	4.7e-10	NA	met-d-L_HDL_PL_pct	rs4704834	G	A	0.644037	Phospholipids to total lipids ratio in large HDL || id:met-d-L_HDL_PL_pct	TRUE	reported	igd
287	5	55860866	0.0422133	0.00497869	6.9e-19	NA	met-d-L_HDL_PL_pct	rs3936510	T	G	0.201954	Phospholipids to total lipids ratio in large HDL || id:met-d-L_HDL_PL_pct	TRUE	reported	igd
288	5	74472939	-0.0305074	0.00416532	3.1e-12	NA	met-d-L_HDL_PL_pct	rs7707394	A	G	0.357078	Phospholipids to total lipids ratio in large HDL || id:met-d-L_HDL_PL_pct	TRUE	reported	igd
289	6	43758873	0.0282758	0.0040264	7.3e-13	NA	met-d-L_HDL_PL_pct	rs6905288	A	G	0.568549	Phospholipids to total lipids ratio in large HDL || id:met-d-L_HDL_PL_pct	TRUE	reported	igd
290	6	32579623	0.0341282	0.00402233	7.3e-18	NA	met-d-L_HDL_PL_pct	rs28752509	T	C	0.457638	Phospholipids to total lipids ratio in large HDL || id:met-d-L_HDL_PL_pct	TRUE	reported	igd
291	6	161005389	0.0563234	0.00650339	2e-18	NA	met-d-L_HDL_PL_pct	rs191555775	T	A	0.106388	Phospholipids to total lipids ratio in large HDL || id:met-d-L_HDL_PL_pct	TRUE	reported	igd
292	6	26123502	0.0556491	0.00769128	7.4e-14	NA	met-d-L_HDL_PL_pct	rs115740542	C	T	0.073599	Phospholipids to total lipids ratio in large HDL || id:met-d-L_HDL_PL_pct	TRUE	reported	igd
293	7	25992323	0.039072	0.0054662	1.2e-13	NA	met-d-L_HDL_PL_pct	rs10642257	A	AAGGCC	0.839854	Phospholipids to total lipids ratio in large HDL || id:met-d-L_HDL_PL_pct	TRUE	reported	igd
294	7	73033559	-0.0753338	0.00594013	2.3e-38	NA	met-d-L_HDL_PL_pct	rs34062580	A	G	0.130287	Phospholipids to total lipids ratio in large HDL || id:met-d-L_HDL_PL_pct	TRUE	reported	igd
295	7	21672251	-0.0250705	0.00421071	7.1e-10	NA	met-d-L_HDL_PL_pct	rs111295689	C	T	0.354802	Phospholipids to total lipids ratio in large HDL || id:met-d-L_HDL_PL_pct	TRUE	reported	igd
296	7	75044830	0.0236238	0.00423519	1.1e-08	NA	met-d-L_HDL_PL_pct	rs236651	A	G	0.573864	Phospholipids to total lipids ratio in large HDL || id:met-d-L_HDL_PL_pct	TRUE	reported	igd
297	8	126500031	-0.0400084	0.00409893	3.4e-23	NA	met-d-L_HDL_PL_pct	rs28601761	G	C	0.420164	Phospholipids to total lipids ratio in large HDL || id:met-d-L_HDL_PL_pct	TRUE	reported	igd
298	8	19819328	-0.0554252	0.00663459	3.4e-17	NA	met-d-L_HDL_PL_pct	rs325	C	T	0.10051	Phospholipids to total lipids ratio in large HDL || id:met-d-L_HDL_PL_pct	TRUE	reported	igd
299	8	18241507	0.0339929	0.00560842	3.4e-10	NA	met-d-L_HDL_PL_pct	rs13277738	T	C	0.149598	Phospholipids to total lipids ratio in large HDL || id:met-d-L_HDL_PL_pct	TRUE	reported	igd
300	9	92207308	0.0228391	0.004004	4.8e-09	NA	met-d-L_HDL_PL_pct	rs7357754	G	A	0.499831	Phospholipids to total lipids ratio in large HDL || id:met-d-L_HDL_PL_pct	TRUE	reported	igd
301	9	15298666	-0.0387324	0.00577758	2.8e-11	NA	met-d-L_HDL_PL_pct	rs675849	C	T	0.860645	Phospholipids to total lipids ratio in large HDL || id:met-d-L_HDL_PL_pct	TRUE	reported	igd
302	9	107599481	-0.0393381	0.0059688	5.9e-12	NA	met-d-L_HDL_PL_pct	rs2297400	C	T	0.128814	Phospholipids to total lipids ratio in large HDL || id:met-d-L_HDL_PL_pct	TRUE	reported	igd
303	9	107661742	0.0473032	0.00453837	1.5e-24	NA	met-d-L_HDL_PL_pct	rs2740488	C	A	0.265313	Phospholipids to total lipids ratio in large HDL || id:met-d-L_HDL_PL_pct	TRUE	reported	igd
304	10	95310539	0.029876	0.00543751	2.8e-08	NA	met-d-L_HDL_PL_pct	rs7091291	C	T	0.161628	Phospholipids to total lipids ratio in large HDL || id:met-d-L_HDL_PL_pct	TRUE	reported	igd
305	11	75474195	-0.0443456	0.00687924	3.2e-11	NA	met-d-L_HDL_PL_pct	rs72997616	A	C	0.094103	Phospholipids to total lipids ratio in large HDL || id:met-d-L_HDL_PL_pct	TRUE	reported	igd
306	11	116648917	-0.0751003	0.00589115	6.9e-37	NA	met-d-L_HDL_PL_pct	rs964184	C	G	0.867255	Phospholipids to total lipids ratio in large HDL || id:met-d-L_HDL_PL_pct	TRUE	reported	igd
307	11	117156893	-0.142787	0.02033	1.9e-11	NA	met-d-L_HDL_PL_pct	rs1047964	T	G	0.010073	Phospholipids to total lipids ratio in large HDL || id:met-d-L_HDL_PL_pct	TRUE	reported	igd
308	11	65473798	0.0253739	0.00440332	3.3e-09	NA	met-d-L_HDL_PL_pct	rs10750766	A	C	0.70979	Phospholipids to total lipids ratio in large HDL || id:met-d-L_HDL_PL_pct	TRUE	reported	igd
309	11	61579463	0.0439573	0.00420427	2.4e-27	NA	met-d-L_HDL_PL_pct	rs174554	G	A	0.341706	Phospholipids to total lipids ratio in large HDL || id:met-d-L_HDL_PL_pct	TRUE	reported	igd
310	11	5701074	-0.0561903	0.00778654	8.5e-14	NA	met-d-L_HDL_PL_pct	rs11601507	A	C	0.069166	Phospholipids to total lipids ratio in large HDL || id:met-d-L_HDL_PL_pct	TRUE	reported	igd
311	11	47316568	0.0373057	0.00469083	2.8e-16	NA	met-d-L_HDL_PL_pct	rs113012334	G	GT	0.710544	Phospholipids to total lipids ratio in large HDL || id:met-d-L_HDL_PL_pct	TRUE	reported	igd
312	12	26463082	-0.0267852	0.00465604	7.2e-09	NA	met-d-L_HDL_PL_pct	rs11048456	T	C	0.75621	Phospholipids to total lipids ratio in large HDL || id:met-d-L_HDL_PL_pct	TRUE	reported	igd
313	12	112007756	-0.0247449	0.00400434	2.9e-10	NA	met-d-L_HDL_PL_pct	rs653178	T	C	0.51605	Phospholipids to total lipids ratio in large HDL || id:met-d-L_HDL_PL_pct	TRUE	reported	igd
314	12	124506631	-0.025652	0.0040961	5.5e-10	NA	met-d-L_HDL_PL_pct	rs10773049	C	T	0.393096	Phospholipids to total lipids ratio in large HDL || id:met-d-L_HDL_PL_pct	TRUE	reported	igd
315	15	58723939	-0.0860852	0.00483571	6.3e-71	NA	met-d-L_HDL_PL_pct	rs2070895	A	G	0.218687	Phospholipids to total lipids ratio in large HDL || id:met-d-L_HDL_PL_pct	TRUE	reported	igd
316	15	101905966	0.0231343	0.00424613	1.1e-08	NA	met-d-L_HDL_PL_pct	rs8029570	G	T	0.333155	Phospholipids to total lipids ratio in large HDL || id:met-d-L_HDL_PL_pct	TRUE	reported	igd
317	15	44522903	-0.0903233	0.012651	8.9e-13	NA	met-d-L_HDL_PL_pct	rs34095861	A	ATT	0.97158	Phospholipids to total lipids ratio in large HDL || id:met-d-L_HDL_PL_pct	TRUE	reported	igd
318	15	58639710	0.0343327	0.00616579	3.1e-08	NA	met-d-L_HDL_PL_pct	rs12898210	G	T	0.121591	Phospholipids to total lipids ratio in large HDL || id:met-d-L_HDL_PL_pct	TRUE	reported	igd
319	15	43623397	0.146388	0.0167073	3.1e-19	NA	met-d-L_HDL_PL_pct	rs45617141	G	T	0.016386	Phospholipids to total lipids ratio in large HDL || id:met-d-L_HDL_PL_pct	TRUE	reported	igd
320	15	58580781	0.0340651	0.00485705	1.9e-13	NA	met-d-L_HDL_PL_pct	rs1560390	C	T	0.219676	Phospholipids to total lipids ratio in large HDL || id:met-d-L_HDL_PL_pct	TRUE	reported	igd
321	15	58687603	0.0646924	0.00409423	9.7e-57	NA	met-d-L_HDL_PL_pct	rs174418	C	T	0.596787	Phospholipids to total lipids ratio in large HDL || id:met-d-L_HDL_PL_pct	TRUE	reported	igd
322	16	56993324	-0.116502	0.00426739	5.5e-169	NA	met-d-L_HDL_PL_pct	rs3764261	A	C	0.324423	Phospholipids to total lipids ratio in large HDL || id:met-d-L_HDL_PL_pct	TRUE	reported	igd
323	16	67947158	-0.03801	0.00626488	1.4e-10	NA	met-d-L_HDL_PL_pct	rs113563886	C	T	0.116669	Phospholipids to total lipids ratio in large HDL || id:met-d-L_HDL_PL_pct	TRUE	reported	igd
324	16	72144174	0.0294189	0.00515977	1.6e-08	NA	met-d-L_HDL_PL_pct	rs9302635	C	T	0.182457	Phospholipids to total lipids ratio in large HDL || id:met-d-L_HDL_PL_pct	TRUE	reported	igd
325	16	67506247	-0.0885081	0.0107583	1.6e-16	NA	met-d-L_HDL_PL_pct	rs8044652	C	T	0.962947	Phospholipids to total lipids ratio in large HDL || id:met-d-L_HDL_PL_pct	TRUE	reported	igd
326	16	88536774	0.0256191	0.00429965	2e-09	NA	met-d-L_HDL_PL_pct	rs870021	A	T	0.322147	Phospholipids to total lipids ratio in large HDL || id:met-d-L_HDL_PL_pct	TRUE	reported	igd
327	17	67081278	-0.101641	0.013446	3.9e-14	NA	met-d-L_HDL_PL_pct	rs77542162	G	A	0.022667	Phospholipids to total lipids ratio in large HDL || id:met-d-L_HDL_PL_pct	TRUE	reported	igd
328	17	66464414	-0.0346148	0.00498192	3.6e-12	NA	met-d-L_HDL_PL_pct	rs2952289	T	C	0.796241	Phospholipids to total lipids ratio in large HDL || id:met-d-L_HDL_PL_pct	TRUE	reported	igd
329	19	11193949	0.103578	0.00612457	4.4e-65	NA	met-d-L_HDL_PL_pct	rs10412048	G	A	0.120899	Phospholipids to total lipids ratio in large HDL || id:met-d-L_HDL_PL_pct	TRUE	reported	igd
330	19	45413233	0.191656	0.0073721	8.2e-150	NA	met-d-L_HDL_PL_pct	rs1065853	T	G	0.080584	Phospholipids to total lipids ratio in large HDL || id:met-d-L_HDL_PL_pct	TRUE	reported	igd
331	19	54815387	-0.0318705	0.00427179	1.2e-14	NA	met-d-L_HDL_PL_pct	rs1645787	G	A	0.326655	Phospholipids to total lipids ratio in large HDL || id:met-d-L_HDL_PL_pct	TRUE	reported	igd
332	19	7197880	-0.0250269	0.0044286	7.6e-09	NA	met-d-L_HDL_PL_pct	rs66921136	C	T	0.712103	Phospholipids to total lipids ratio in large HDL || id:met-d-L_HDL_PL_pct	TRUE	reported	igd
333	19	45337918	-0.0926153	0.0109639	1.6e-17	NA	met-d-L_HDL_PL_pct	rs147711004	A	G	0.036035	Phospholipids to total lipids ratio in large HDL || id:met-d-L_HDL_PL_pct	TRUE	reported	igd
334	19	11275842	-0.0249798	0.00427186	1.2e-09	NA	met-d-L_HDL_PL_pct	rs3185010	A	G	0.327194	Phospholipids to total lipids ratio in large HDL || id:met-d-L_HDL_PL_pct	TRUE	reported	igd
335	19	45421204	-0.0915038	0.012189	5.8e-15	NA	met-d-L_HDL_PL_pct	rs150966173	T	C	0.02797	Phospholipids to total lipids ratio in large HDL || id:met-d-L_HDL_PL_pct	TRUE	reported	igd
336	20	17844492	0.0322579	0.00421981	3.3e-16	NA	met-d-L_HDL_PL_pct	rs2618567	T	G	0.658874	Phospholipids to total lipids ratio in large HDL || id:met-d-L_HDL_PL_pct	TRUE	reported	igd
337	20	44105636	0.0433524	0.00625695	5.1e-12	NA	met-d-L_HDL_PL_pct	rs6065819	A	C	0.116575	Phospholipids to total lipids ratio in large HDL || id:met-d-L_HDL_PL_pct	TRUE	reported	igd
338	20	62711459	-0.0219389	0.0040021	2.9e-08	NA	met-d-L_HDL_PL_pct	rs8126001	T	C	0.488474	Phospholipids to total lipids ratio in large HDL || id:met-d-L_HDL_PL_pct	TRUE	reported	igd
339	20	44554015	0.168369	0.00514455	1e-200	NA	met-d-L_HDL_PL_pct	rs6065906	C	T	0.185854	Phospholipids to total lipids ratio in large HDL || id:met-d-L_HDL_PL_pct	TRUE	reported	igd
340	1	109821797	0.026789	0.00475181	4.4e-09	NA	met-d-XL_VLDL_PL	rs4970836	A	G	0.773331	Phospholipids in very large VLDL || id:met-d-XL_VLDL_PL	TRUE	reported	igd
341	1	230296153	-0.0440043	0.00407837	3.9e-28	NA	met-d-XL_VLDL_PL	rs10864726	T	C	0.605466	Phospholipids in very large VLDL || id:met-d-XL_VLDL_PL	TRUE	reported	igd
342	1	27284913	0.107155	0.0132326	1.7e-15	NA	met-d-XL_VLDL_PL	rs79598313	T	C	0.023202	Phospholipids in very large VLDL || id:met-d-XL_VLDL_PL	TRUE	reported	igd
343	1	63060037	0.0754143	0.00416939	5.8e-76	NA	met-d-XL_VLDL_PL	rs79439217	T	TAAGAA	0.647276	Phospholipids in very large VLDL || id:met-d-XL_VLDL_PL	TRUE	reported	igd
344	2	21530659	-0.0266611	0.00406741	1.2e-10	NA	met-d-XL_VLDL_PL	rs60960031	A	G	0.402844	Phospholipids in very large VLDL || id:met-d-XL_VLDL_PL	TRUE	reported	igd
345	2	27730940	-0.0865994	0.00407108	2e-104	NA	met-d-XL_VLDL_PL	rs1260326	C	T	0.603982	Phospholipids in very large VLDL || id:met-d-XL_VLDL_PL	TRUE	reported	igd
346	2	219699999	0.0631258	0.0103136	2.4e-10	NA	met-d-XL_VLDL_PL	rs78058190	A	G	0.0501	Phospholipids in very large VLDL || id:met-d-XL_VLDL_PL	TRUE	reported	igd
347	2	227104111	0.0378262	0.00416932	7.3e-20	NA	met-d-XL_VLDL_PL	rs2972140	C	T	0.650638	Phospholipids in very large VLDL || id:met-d-XL_VLDL_PL	TRUE	reported	igd
348	2	165528876	-0.0503689	0.00408013	1.8e-36	NA	met-d-XL_VLDL_PL	rs13389219	T	C	0.392528	Phospholipids in very large VLDL || id:met-d-XL_VLDL_PL	TRUE	reported	igd
349	2	21231524	-0.10327	0.00491158	2e-100	NA	met-d-XL_VLDL_PL	rs676210	A	G	0.205765	Phospholipids in very large VLDL || id:met-d-XL_VLDL_PL	TRUE	reported	igd
350	3	135956305	0.0373341	0.00471831	3.3e-16	NA	met-d-XL_VLDL_PL	rs684773	C	A	0.767067	Phospholipids in very large VLDL || id:met-d-XL_VLDL_PL	TRUE	reported	igd
351	3	150097635	0.0407402	0.00790985	2.4e-08	NA	met-d-XL_VLDL_PL	rs9844972	C	G	0.070765	Phospholipids in very large VLDL || id:met-d-XL_VLDL_PL	TRUE	reported	igd
352	3	52838654	-0.0353024	0.00611036	1.6e-08	NA	met-d-XL_VLDL_PL	rs9968117	T	C	0.120934	Phospholipids in very large VLDL || id:met-d-XL_VLDL_PL	TRUE	reported	igd
353	4	3443931	-0.0331094	0.0041267	1.1e-16	NA	met-d-XL_VLDL_PL	rs13108218	G	A	0.615355	Phospholipids in very large VLDL || id:met-d-XL_VLDL_PL	TRUE	reported	igd
354	4	171563776	-0.0269875	0.00468974	2.1e-09	NA	met-d-XL_VLDL_PL	rs4491981	A	C	0.241217	Phospholipids in very large VLDL || id:met-d-XL_VLDL_PL	TRUE	reported	igd
355	4	87976359	0.0331921	0.00409093	2.1e-17	NA	met-d-XL_VLDL_PL	rs1471251	T	A	0.397126	Phospholipids in very large VLDL || id:met-d-XL_VLDL_PL	TRUE	reported	igd
356	4	15105312	0.0225026	0.00423354	3.6e-08	NA	met-d-XL_VLDL_PL	rs4698315	C	G	0.66337	Phospholipids in very large VLDL || id:met-d-XL_VLDL_PL	TRUE	reported	igd
357	5	156443066	0.0393371	0.00415807	4.2e-23	NA	met-d-XL_VLDL_PL	rs4704834	G	A	0.644037	Phospholipids in very large VLDL || id:met-d-XL_VLDL_PL	TRUE	reported	igd
358	5	57610069	-0.0214678	0.00409439	3.5e-08	NA	met-d-XL_VLDL_PL	rs37538	C	G	0.602796	Phospholipids in very large VLDL || id:met-d-XL_VLDL_PL	TRUE	reported	igd
359	5	74656539	0.0238291	0.00406945	2.7e-09	NA	met-d-XL_VLDL_PL	rs12916	C	T	0.400342	Phospholipids in very large VLDL || id:met-d-XL_VLDL_PL	TRUE	reported	igd
360	5	55857025	-0.0552152	0.00508018	1.9e-27	NA	met-d-XL_VLDL_PL	rs11429307	G	GT	0.808481	Phospholipids in very large VLDL || id:met-d-XL_VLDL_PL	TRUE	reported	igd
361	6	161010118	-0.185157	0.00737812	5.6e-142	NA	met-d-XL_VLDL_PL	rs10455872	G	A	0.07899	Phospholipids in very large VLDL || id:met-d-XL_VLDL_PL	TRUE	reported	igd
362	6	160922870	-0.308372	0.0147651	2.7e-97	NA	met-d-XL_VLDL_PL	rs117733303	G	A	0.0185	Phospholipids in very large VLDL || id:met-d-XL_VLDL_PL	TRUE	reported	igd
363	6	31236679	0.0248897	0.00454038	4.9e-08	NA	met-d-XL_VLDL_PL	rs1130580	C	T	0.289862	Phospholipids in very large VLDL || id:met-d-XL_VLDL_PL	TRUE	reported	igd
364	6	161017363	-0.10239	0.0110815	6.5e-20	NA	met-d-XL_VLDL_PL	rs73596816	A	G	0.033595	Phospholipids in very large VLDL || id:met-d-XL_VLDL_PL	TRUE	reported	igd
365	6	32623528	0.0350729	0.00588268	1.9e-10	NA	met-d-XL_VLDL_PL	rs73732214	A	G	0.140432	Phospholipids in very large VLDL || id:met-d-XL_VLDL_PL	TRUE	reported	igd
366	6	127455029	0.0333173	0.00399374	4e-18	NA	met-d-XL_VLDL_PL	rs2186037	G	A	0.51879	Phospholipids in very large VLDL || id:met-d-XL_VLDL_PL	TRUE	reported	igd
367	6	32586831	0.0423411	0.0042901	1.1e-22	NA	met-d-XL_VLDL_PL	rs13191810	T	C	0.312294	Phospholipids in very large VLDL || id:met-d-XL_VLDL_PL	TRUE	reported	igd
368	6	43757896	0.0310812	0.00398506	4e-15	NA	met-d-XL_VLDL_PL	rs998584	A	C	0.482334	Phospholipids in very large VLDL || id:met-d-XL_VLDL_PL	TRUE	reported	igd
369	6	139834012	-0.0357897	0.0041174	2.4e-18	NA	met-d-XL_VLDL_PL	rs632057	G	T	0.627779	Phospholipids in very large VLDL || id:met-d-XL_VLDL_PL	TRUE	reported	igd
370	6	160545046	0.0609716	0.00981889	7.6e-11	NA	met-d-XL_VLDL_PL	rs111909590	T	C	0.043581	Phospholipids in very large VLDL || id:met-d-XL_VLDL_PL	TRUE	reported	igd
371	7	73037366	-0.0901947	0.00496411	3.1e-73	NA	met-d-XL_VLDL_PL	rs55747707	A	G	0.203628	Phospholipids in very large VLDL || id:met-d-XL_VLDL_PL	TRUE	reported	igd
372	7	130433594	0.0333545	0.00430262	5.8e-15	NA	met-d-XL_VLDL_PL	rs11976955	G	C	0.314213	Phospholipids in very large VLDL || id:met-d-XL_VLDL_PL	TRUE	reported	igd
373	7	25983400	-0.0262516	0.0041642	4e-11	NA	met-d-XL_VLDL_PL	rs56001710	T	A	0.58058	Phospholipids in very large VLDL || id:met-d-XL_VLDL_PL	TRUE	reported	igd
374	7	72823777	0.0892697	0.0146907	4.8e-10	NA	met-d-XL_VLDL_PL	rs42125	G	A	0.023006	Phospholipids in very large VLDL || id:met-d-XL_VLDL_PL	TRUE	reported	igd
375	8	19819724	-0.190078	0.00661006	1.3e-186	NA	met-d-XL_VLDL_PL	rs328	G	C	0.10031	Phospholipids in very large VLDL || id:met-d-XL_VLDL_PL	TRUE	reported	igd
376	8	59388565	-0.0260931	0.00421792	2.9e-10	NA	met-d-XL_VLDL_PL	rs2081687	C	T	0.663094	Phospholipids in very large VLDL || id:met-d-XL_VLDL_PL	TRUE	reported	igd
377	8	126631799	0.0336055	0.00489197	1.7e-12	NA	met-d-XL_VLDL_PL	rs3860847	A	G	0.212511	Phospholipids in very large VLDL || id:met-d-XL_VLDL_PL	TRUE	reported	igd
378	8	126500031	-0.0840745	0.00408109	9.6e-99	NA	met-d-XL_VLDL_PL	rs28601761	G	C	0.420164	Phospholipids in very large VLDL || id:met-d-XL_VLDL_PL	TRUE	reported	igd
379	8	11493678	0.0305588	0.00411293	1.7e-13	NA	met-d-XL_VLDL_PL	rs13265201	G	C	0.396268	Phospholipids in very large VLDL || id:met-d-XL_VLDL_PL	TRUE	reported	igd
380	8	19733244	-0.063783	0.00485584	4e-39	NA	met-d-XL_VLDL_PL	rs1561748	C	G	0.267457	Phospholipids in very large VLDL || id:met-d-XL_VLDL_PL	TRUE	reported	igd
381	10	94797973	-0.0277884	0.00406962	2.1e-13	NA	met-d-XL_VLDL_PL	rs2478236	A	G	0.403779	Phospholipids in very large VLDL || id:met-d-XL_VLDL_PL	TRUE	reported	igd
382	10	99710001	0.0226621	0.00414102	2.9e-08	NA	met-d-XL_VLDL_PL	rs201289443	G	C	0.410222	Phospholipids in very large VLDL || id:met-d-XL_VLDL_PL	TRUE	reported	igd
383	10	64882300	-0.0333779	0.00401769	2.3e-17	NA	met-d-XL_VLDL_PL	rs10761716	G	C	0.441499	Phospholipids in very large VLDL || id:met-d-XL_VLDL_PL	TRUE	reported	igd
384	11	61606642	0.0484312	0.00416535	1.7e-32	NA	met-d-XL_VLDL_PL	rs174580	G	A	0.351967	Phospholipids in very large VLDL || id:met-d-XL_VLDL_PL	TRUE	reported	igd
385	11	116648917	-0.207382	0.00587388	1e-200	NA	met-d-XL_VLDL_PL	rs964184	C	G	0.867255	Phospholipids in very large VLDL || id:met-d-XL_VLDL_PL	TRUE	reported	igd
386	11	117156893	-0.249026	0.0202704	3.1e-35	NA	met-d-XL_VLDL_PL	rs1047964	T	G	0.010073	Phospholipids in very large VLDL || id:met-d-XL_VLDL_PL	TRUE	reported	igd
387	11	116916060	0.269629	0.020174	3.4e-44	NA	met-d-XL_VLDL_PL	rs144018203	C	G	0.010654	Phospholipids in very large VLDL || id:met-d-XL_VLDL_PL	TRUE	reported	igd
388	12	124409502	-0.0317775	0.00427486	7.5e-15	NA	met-d-XL_VLDL_PL	rs7133378	A	G	0.319792	Phospholipids in very large VLDL || id:met-d-XL_VLDL_PL	TRUE	reported	igd
389	12	57766392	-0.0315164	0.0046602	7.5e-12	NA	met-d-XL_VLDL_PL	rs4760254	C	G	0.239057	Phospholipids in very large VLDL || id:met-d-XL_VLDL_PL	TRUE	reported	igd
390	13	95231825	0.024075	0.0041702	3.2e-09	NA	met-d-XL_VLDL_PL	rs2275647	A	G	0.351879	Phospholipids in very large VLDL || id:met-d-XL_VLDL_PL	TRUE	reported	igd
391	13	114544024	0.0286526	0.00435559	6.6e-12	NA	met-d-XL_VLDL_PL	rs7140110	C	T	0.299371	Phospholipids in very large VLDL || id:met-d-XL_VLDL_PL	TRUE	reported	igd
392	15	43726625	0.12872	0.012617	1e-25	NA	met-d-XL_VLDL_PL	rs150844304	C	A	0.025676	Phospholipids in very large VLDL || id:met-d-XL_VLDL_PL	TRUE	reported	igd
393	16	72096227	0.0443732	0.00657889	3.5e-12	NA	met-d-XL_VLDL_PL	rs34682685	A	G	0.103445	Phospholipids in very large VLDL || id:met-d-XL_VLDL_PL	TRUE	reported	igd
394	16	81534790	-0.0328086	0.00434433	7.1e-15	NA	met-d-XL_VLDL_PL	rs2925979	C	T	0.69893	Phospholipids in very large VLDL || id:met-d-XL_VLDL_PL	TRUE	reported	igd
395	16	56989590	-0.0740412	0.00426266	5.5e-70	NA	met-d-XL_VLDL_PL	rs247616	T	C	0.32471	Phospholipids in very large VLDL || id:met-d-XL_VLDL_PL	TRUE	reported	igd
396	17	64210580	-0.0891858	0.0115911	9.3e-16	NA	met-d-XL_VLDL_PL	rs1801689	C	A	0.030531	Phospholipids in very large VLDL || id:met-d-XL_VLDL_PL	TRUE	reported	igd
397	17	17434141	0.0524075	0.00826022	2.9e-10	NA	met-d-XL_VLDL_PL	rs9889584	A	G	0.062205	Phospholipids in very large VLDL || id:met-d-XL_VLDL_PL	TRUE	reported	igd
398	17	41926126	0.117804	0.0114184	5.5e-26	NA	met-d-XL_VLDL_PL	rs72836561	T	C	0.031483	Phospholipids in very large VLDL || id:met-d-XL_VLDL_PL	TRUE	reported	igd
399	17	17538289	0.0492494	0.00866889	2.6e-08	NA	met-d-XL_VLDL_PL	rs75634664	G	C	0.060203	Phospholipids in very large VLDL || id:met-d-XL_VLDL_PL	TRUE	reported	igd
400	19	45416178	0.0461075	0.0046952	2.6e-23	NA	met-d-XL_VLDL_PL	rs483082	T	G	0.236543	Phospholipids in very large VLDL || id:met-d-XL_VLDL_PL	TRUE	reported	igd
401	19	45430280	0.0833664	0.00428645	3.5e-87	NA	met-d-XL_VLDL_PL	rs5112	G	C	0.533746	Phospholipids in very large VLDL || id:met-d-XL_VLDL_PL	TRUE	reported	igd
402	19	8429323	-0.228429	0.0142979	1e-58	NA	met-d-XL_VLDL_PL	rs116843064	A	G	0.019852	Phospholipids in very large VLDL || id:met-d-XL_VLDL_PL	TRUE	reported	igd
403	19	11209722	-0.0396789	0.00603936	5.2e-11	NA	met-d-XL_VLDL_PL	rs73015034	A	C	0.126031	Phospholipids in very large VLDL || id:met-d-XL_VLDL_PL	TRUE	reported	igd
404	19	19379549	-0.112914	0.00760031	3e-50	NA	met-d-XL_VLDL_PL	rs58542926	T	C	0.074402	Phospholipids in very large VLDL || id:met-d-XL_VLDL_PL	TRUE	reported	igd
405	19	8439538	-0.0538808	0.00865882	2.4e-10	NA	met-d-XL_VLDL_PL	rs57192995	C	G	0.056299	Phospholipids in very large VLDL || id:met-d-XL_VLDL_PL	TRUE	reported	igd
406	20	44576502	0.0404056	0.00513012	2.4e-16	NA	met-d-XL_VLDL_PL	rs7679	C	T	0.186404	Phospholipids in very large VLDL || id:met-d-XL_VLDL_PL	TRUE	reported	igd
407	20	39204644	-0.0251432	0.00425754	3.6e-10	NA	met-d-XL_VLDL_PL	rs2092479	G	C	0.32623	Phospholipids in very large VLDL || id:met-d-XL_VLDL_PL	TRUE	reported	igd
408	1	62960250	0.087722	0.011292	1.42004e-14	21231	met-c-951	rs1168041	C	T	0.721566	Phospholipids in very large VLDL || id:met-c-951	TRUE	reported	igd
409	2	21142994	-0.06218	0.010624	6.74e-09	21231	met-c-951	rs4296389	T	C	0.312983	Phospholipids in very large VLDL || id:met-c-951	TRUE	reported	igd
410	2	27730940	-0.090475	0.010281	2.86022e-18	21237	met-c-951	rs1260326	C	T	0.639167	Phospholipids in very large VLDL || id:met-c-951	TRUE	reported	igd
411	6	161010118	-0.170197	0.028482	3.23996e-09	18385	met-c-951	rs10455872	G	A	0.041039	Phospholipids in very large VLDL || id:met-c-951	TRUE	reported	igd
412	7	72971728	-0.108643	0.015294	1.98016e-12	21231	met-c-951	rs13234157	A	C	0.124814	Phospholipids in very large VLDL || id:met-c-951	TRUE	reported	igd
413	8	19851508	-0.125094	0.017558	1.69981e-12	21235	met-c-951	rs76975037	A	C	0.087145	Phospholipids in very large VLDL || id:met-c-951	TRUE	reported	igd
414	11	116648917	-0.174288	0.014102	1.80011e-34	21235	met-c-951	rs964184	C	G	0.861796	Phospholipids in very large VLDL || id:met-c-951	TRUE	reported	igd
415	19	19366632	-0.139765	0.021158	6.02976e-11	21234	met-c-951	rs72999033	T	C	0.059374	Phospholipids in very large VLDL || id:met-c-951	TRUE	reported	igd
416	19	45416741	0.091243	0.012175	1.13999e-13	21233	met-c-951	rs438811	T	C	0.233748	Phospholipids in very large VLDL || id:met-c-951	TRUE	reported	igd
417	1	109822166	0.0350241	0.0047393	2.3e-14	NA	met-d-L_VLDL_PL	rs599839	A	G	0.772085	Phospholipids in large VLDL || id:met-d-L_VLDL_PL	TRUE	reported	igd
418	1	230296153	-0.0454784	0.00407741	4.4e-30	NA	met-d-L_VLDL_PL	rs10864726	T	C	0.605466	Phospholipids in large VLDL || id:met-d-L_VLDL_PL	TRUE	reported	igd
419	1	27284913	0.107805	0.0132295	1.1e-15	NA	met-d-L_VLDL_PL	rs79598313	T	C	0.023202	Phospholipids in large VLDL || id:met-d-L_VLDL_PL	TRUE	reported	igd
420	1	63060037	0.0751168	0.0041684	3.6e-75	NA	met-d-L_VLDL_PL	rs79439217	T	TAAGAA	0.647276	Phospholipids in large VLDL || id:met-d-L_VLDL_PL	TRUE	reported	igd
421	2	21531266	-0.0289528	0.00408254	2.5e-12	NA	met-d-L_VLDL_PL	rs1510606	A	G	0.396984	Phospholipids in large VLDL || id:met-d-L_VLDL_PL	TRUE	reported	igd
422	2	165528624	-0.0495572	0.00407993	1.9e-35	NA	met-d-L_VLDL_PL	rs1128249	T	G	0.391999	Phospholipids in large VLDL || id:met-d-L_VLDL_PL	TRUE	reported	igd
423	2	227093585	0.0383221	0.00416784	1.9e-20	NA	met-d-L_VLDL_PL	rs2943640	C	A	0.651849	Phospholipids in large VLDL || id:met-d-L_VLDL_PL	TRUE	reported	igd
424	2	21231524	-0.109939	0.0049099	4.2e-113	NA	met-d-L_VLDL_PL	rs676210	A	G	0.205765	Phospholipids in large VLDL || id:met-d-L_VLDL_PL	TRUE	reported	igd
425	2	219699999	0.0613049	0.01031	1.1e-09	NA	met-d-L_VLDL_PL	rs78058190	A	G	0.0501	Phospholipids in large VLDL || id:met-d-L_VLDL_PL	TRUE	reported	igd
426	2	27730940	-0.0896598	0.00406968	6.3e-112	NA	met-d-L_VLDL_PL	rs1260326	C	T	0.603982	Phospholipids in large VLDL || id:met-d-L_VLDL_PL	TRUE	reported	igd
427	3	135956305	0.0360192	0.0047178	3.3e-15	NA	met-d-L_VLDL_PL	rs684773	C	A	0.767067	Phospholipids in large VLDL || id:met-d-L_VLDL_PL	TRUE	reported	igd
428	3	150097635	0.0413335	0.00790899	2e-08	NA	met-d-L_VLDL_PL	rs9844972	C	G	0.070765	Phospholipids in large VLDL || id:met-d-L_VLDL_PL	TRUE	reported	igd
429	3	52838654	-0.0364335	0.0061097	6.5e-09	NA	met-d-L_VLDL_PL	rs9968117	T	C	0.120934	Phospholipids in large VLDL || id:met-d-L_VLDL_PL	TRUE	reported	igd
430	4	171563776	-0.0268242	0.00468892	3.5e-09	NA	met-d-L_VLDL_PL	rs4491981	A	C	0.241217	Phospholipids in large VLDL || id:met-d-L_VLDL_PL	TRUE	reported	igd
431	4	3443931	-0.0360511	0.00412598	2.5e-19	NA	met-d-L_VLDL_PL	rs13108218	G	A	0.615355	Phospholipids in large VLDL || id:met-d-L_VLDL_PL	TRUE	reported	igd
432	4	87976359	0.0324712	0.00409021	8.4e-17	NA	met-d-L_VLDL_PL	rs1471251	T	A	0.397126	Phospholipids in large VLDL || id:met-d-L_VLDL_PL	TRUE	reported	igd
433	4	15105312	0.0230019	0.0042328	1.2e-08	NA	met-d-L_VLDL_PL	rs4698315	C	G	0.66337	Phospholipids in large VLDL || id:met-d-L_VLDL_PL	TRUE	reported	igd
434	5	156443066	0.0391433	0.00415776	1.2e-22	NA	met-d-L_VLDL_PL	rs4704834	G	A	0.644037	Phospholipids in large VLDL || id:met-d-L_VLDL_PL	TRUE	reported	igd
435	5	55857025	-0.0567754	0.00507979	6e-29	NA	met-d-L_VLDL_PL	rs11429307	G	GT	0.808481	Phospholipids in large VLDL || id:met-d-L_VLDL_PL	TRUE	reported	igd
436	5	67513457	-0.0278692	0.00497065	5.4e-09	NA	met-d-L_VLDL_PL	rs13186403	T	G	0.215247	Phospholipids in large VLDL || id:met-d-L_VLDL_PL	TRUE	reported	igd
437	6	32586831	0.0438046	0.00429091	1e-23	NA	met-d-L_VLDL_PL	rs13191810	T	C	0.312294	Phospholipids in large VLDL || id:met-d-L_VLDL_PL	TRUE	reported	igd
438	6	160922870	-0.2699	0.0147679	6.6e-75	NA	met-d-L_VLDL_PL	rs117733303	G	A	0.0185	Phospholipids in large VLDL || id:met-d-L_VLDL_PL	TRUE	reported	igd
439	6	161125454	0.0591591	0.0077952	9.7e-15	NA	met-d-L_VLDL_PL	rs12212146	C	T	0.074301	Phospholipids in large VLDL || id:met-d-L_VLDL_PL	TRUE	reported	igd
440	6	32623528	0.035166	0.00588379	1.2e-10	NA	met-d-L_VLDL_PL	rs73732214	A	G	0.140432	Phospholipids in large VLDL || id:met-d-L_VLDL_PL	TRUE	reported	igd
441	6	43757896	0.0334637	0.00398581	2.2e-17	NA	met-d-L_VLDL_PL	rs998584	A	C	0.482334	Phospholipids in large VLDL || id:met-d-L_VLDL_PL	TRUE	reported	igd
442	6	160543148	0.0550105	0.00782865	4.1e-13	NA	met-d-L_VLDL_PL	rs12208357	T	C	0.069998	Phospholipids in large VLDL || id:met-d-L_VLDL_PL	TRUE	reported	igd
443	6	127455029	0.0342616	0.0039945	3.3e-19	NA	met-d-L_VLDL_PL	rs2186037	G	A	0.51879	Phospholipids in large VLDL || id:met-d-L_VLDL_PL	TRUE	reported	igd
444	6	161010118	-0.153353	0.00737951	2.5e-98	NA	met-d-L_VLDL_PL	rs10455872	G	A	0.07899	Phospholipids in large VLDL || id:met-d-L_VLDL_PL	TRUE	reported	igd
445	6	139834012	-0.0355736	0.00411818	4.7e-18	NA	met-d-L_VLDL_PL	rs632057	G	T	0.627779	Phospholipids in large VLDL || id:met-d-L_VLDL_PL	TRUE	reported	igd
446	7	25983400	-0.025652	0.00416353	1.1e-10	NA	met-d-L_VLDL_PL	rs56001710	T	A	0.58058	Phospholipids in large VLDL || id:met-d-L_VLDL_PL	TRUE	reported	igd
447	7	73037366	-0.0957834	0.00496331	7.8e-82	NA	met-d-L_VLDL_PL	rs55747707	A	G	0.203628	Phospholipids in large VLDL || id:met-d-L_VLDL_PL	TRUE	reported	igd
448	7	130433594	0.0338024	0.00430192	4.6e-15	NA	met-d-L_VLDL_PL	rs11976955	G	C	0.314213	Phospholipids in large VLDL || id:met-d-L_VLDL_PL	TRUE	reported	igd
449	7	72823777	0.0923975	0.0146883	1.6e-10	NA	met-d-L_VLDL_PL	rs42125	G	A	0.023006	Phospholipids in large VLDL || id:met-d-L_VLDL_PL	TRUE	reported	igd
450	8	19733244	-0.0654465	0.00485453	2.9e-41	NA	met-d-L_VLDL_PL	rs1561748	C	G	0.267457	Phospholipids in large VLDL || id:met-d-L_VLDL_PL	TRUE	reported	igd
451	8	126500031	-0.084322	0.00407998	1.5e-99	NA	met-d-L_VLDL_PL	rs28601761	G	C	0.420164	Phospholipids in large VLDL || id:met-d-L_VLDL_PL	TRUE	reported	igd
452	8	59388565	-0.0254913	0.00421678	1e-09	NA	met-d-L_VLDL_PL	rs2081687	C	T	0.663094	Phospholipids in large VLDL || id:met-d-L_VLDL_PL	TRUE	reported	igd
453	8	11493678	0.0318071	0.00411182	2e-14	NA	met-d-L_VLDL_PL	rs13265201	G	C	0.396268	Phospholipids in large VLDL || id:met-d-L_VLDL_PL	TRUE	reported	igd
454	8	19819724	-0.194114	0.00660827	3.9e-194	NA	met-d-L_VLDL_PL	rs328	G	C	0.10031	Phospholipids in large VLDL || id:met-d-L_VLDL_PL	TRUE	reported	igd
455	8	22875985	-0.0235045	0.00432341	3.4e-08	NA	met-d-L_VLDL_PL	rs2241260	G	A	0.314453	Phospholipids in large VLDL || id:met-d-L_VLDL_PL	TRUE	reported	igd
456	8	126631799	0.0331854	0.00489065	3.1e-12	NA	met-d-L_VLDL_PL	rs3860847	A	G	0.212511	Phospholipids in large VLDL || id:met-d-L_VLDL_PL	TRUE	reported	igd
457	10	64882300	-0.0346945	0.00401692	1.4e-18	NA	met-d-L_VLDL_PL	rs10761716	G	C	0.441499	Phospholipids in large VLDL || id:met-d-L_VLDL_PL	TRUE	reported	igd
458	10	99710001	0.0226439	0.00414022	2.1e-08	NA	met-d-L_VLDL_PL	rs201289443	G	C	0.410222	Phospholipids in large VLDL || id:met-d-L_VLDL_PL	TRUE	reported	igd
459	10	115792062	-0.022693	0.00452305	3.2e-08	NA	met-d-L_VLDL_PL	rs2484294	A	G	0.733574	Phospholipids in large VLDL || id:met-d-L_VLDL_PL	TRUE	reported	igd
460	10	94797973	-0.0277006	0.00406883	1.9e-13	NA	met-d-L_VLDL_PL	rs2478236	A	G	0.403779	Phospholipids in large VLDL || id:met-d-L_VLDL_PL	TRUE	reported	igd
461	11	117156893	-0.245284	0.0202664	4.6e-34	NA	met-d-L_VLDL_PL	rs1047964	T	G	0.010073	Phospholipids in large VLDL || id:met-d-L_VLDL_PL	TRUE	reported	igd
462	11	61606642	0.0488782	0.00416452	3e-33	NA	met-d-L_VLDL_PL	rs174580	G	A	0.351967	Phospholipids in large VLDL || id:met-d-L_VLDL_PL	TRUE	reported	igd
463	11	116648917	-0.214938	0.00587271	1e-200	NA	met-d-L_VLDL_PL	rs964184	C	G	0.867255	Phospholipids in large VLDL || id:met-d-L_VLDL_PL	TRUE	reported	igd
464	11	63862882	0.0503486	0.00874906	1.8e-08	NA	met-d-L_VLDL_PL	rs11231694	C	G	0.055798	Phospholipids in large VLDL || id:met-d-L_VLDL_PL	TRUE	reported	igd
465	11	116389017	0.0243318	0.00434961	4.2e-08	NA	met-d-L_VLDL_PL	rs883863	A	G	0.308022	Phospholipids in large VLDL || id:met-d-L_VLDL_PL	TRUE	reported	igd
466	11	116714293	0.280632	0.0210508	3.7e-44	NA	met-d-L_VLDL_PL	rs141469619	G	A	0.010141	Phospholipids in large VLDL || id:met-d-L_VLDL_PL	TRUE	reported	igd
467	12	124409502	-0.0339972	0.00427413	1.2e-16	NA	met-d-L_VLDL_PL	rs7133378	A	G	0.319792	Phospholipids in large VLDL || id:met-d-L_VLDL_PL	TRUE	reported	igd
468	12	57766392	-0.0327671	0.00465939	1.4e-12	NA	met-d-L_VLDL_PL	rs4760254	C	G	0.239057	Phospholipids in large VLDL || id:met-d-L_VLDL_PL	TRUE	reported	igd
469	12	4384844	-0.0849806	0.0155048	1.9e-08	NA	met-d-L_VLDL_PL	rs76895963	G	T	0.020556	Phospholipids in large VLDL || id:met-d-L_VLDL_PL	TRUE	reported	igd
470	13	114544024	0.0275612	0.0043552	2.8e-11	NA	met-d-L_VLDL_PL	rs7140110	C	T	0.299371	Phospholipids in large VLDL || id:met-d-L_VLDL_PL	TRUE	reported	igd
471	15	43726625	0.136236	0.0126156	8e-29	NA	met-d-L_VLDL_PL	rs150844304	C	A	0.025676	Phospholipids in large VLDL || id:met-d-L_VLDL_PL	TRUE	reported	igd
472	16	56989590	-0.0801022	0.00426169	4e-81	NA	met-d-L_VLDL_PL	rs247616	T	C	0.32471	Phospholipids in large VLDL || id:met-d-L_VLDL_PL	TRUE	reported	igd
473	16	72096227	0.0457935	0.00657739	7e-13	NA	met-d-L_VLDL_PL	rs34682685	A	G	0.103445	Phospholipids in large VLDL || id:met-d-L_VLDL_PL	TRUE	reported	igd
474	16	81534790	-0.0344473	0.00434335	3.1e-16	NA	met-d-L_VLDL_PL	rs2925979	C	T	0.69893	Phospholipids in large VLDL || id:met-d-L_VLDL_PL	TRUE	reported	igd
475	17	17431208	0.0572534	0.00870822	7.4e-11	NA	met-d-L_VLDL_PL	rs8078513	A	C	0.057351	Phospholipids in large VLDL || id:met-d-L_VLDL_PL	TRUE	reported	igd
476	17	41926126	0.124138	0.0114166	1.5e-28	NA	met-d-L_VLDL_PL	rs72836561	T	C	0.031483	Phospholipids in large VLDL || id:met-d-L_VLDL_PL	TRUE	reported	igd
477	17	64210580	-0.0785607	0.0115893	2e-12	NA	met-d-L_VLDL_PL	rs1801689	C	A	0.030531	Phospholipids in large VLDL || id:met-d-L_VLDL_PL	TRUE	reported	igd
478	19	11209722	-0.0419692	0.00603845	3.8e-12	NA	met-d-L_VLDL_PL	rs73015034	A	C	0.126031	Phospholipids in large VLDL || id:met-d-L_VLDL_PL	TRUE	reported	igd
479	19	19379549	-0.116092	0.00759917	3.9e-53	NA	met-d-L_VLDL_PL	rs58542926	T	C	0.074402	Phospholipids in large VLDL || id:met-d-L_VLDL_PL	TRUE	reported	igd
480	19	45430280	0.079906	0.00428581	2.6e-80	NA	met-d-L_VLDL_PL	rs5112	G	C	0.533746	Phospholipids in large VLDL || id:met-d-L_VLDL_PL	TRUE	reported	igd
481	19	8439538	-0.0551942	0.00865752	1e-10	NA	met-d-L_VLDL_PL	rs57192995	C	G	0.056299	Phospholipids in large VLDL || id:met-d-L_VLDL_PL	TRUE	reported	igd
482	19	45424514	0.0474039	0.00525817	1.4e-20	NA	met-d-L_VLDL_PL	rs157592	C	A	0.185289	Phospholipids in large VLDL || id:met-d-L_VLDL_PL	TRUE	reported	igd
483	19	8429323	-0.234012	0.0142958	3.9e-61	NA	met-d-L_VLDL_PL	rs116843064	A	G	0.019852	Phospholipids in large VLDL || id:met-d-L_VLDL_PL	TRUE	reported	igd
484	20	39204644	-0.0260623	0.00425683	1.1e-10	NA	met-d-L_VLDL_PL	rs2092479	G	C	0.32623	Phospholipids in large VLDL || id:met-d-L_VLDL_PL	TRUE	reported	igd
485	20	44576502	0.0598737	0.00512926	4.3e-33	NA	met-d-L_VLDL_PL	rs7679	C	T	0.186404	Phospholipids in large VLDL || id:met-d-L_VLDL_PL	TRUE	reported	igd
486	1	62922660	-0.077306	0.010745	9.56e-13	21232	met-c-891	rs4350231	A	G	0.301343	Phospholipids in large VLDL || id:met-c-891	TRUE	reported	igd
487	2	27730940	-0.096815	0.010277	9.13e-21	21239	met-c-891	rs1260326	C	T	0.639169	Phospholipids in large VLDL || id:met-c-891	TRUE	reported	igd
488	6	43756169	-0.095551	0.016614	1.16e-08	18247	met-c-891	rs9472125	T	C	0.165755	Phospholipids in large VLDL || id:met-c-891	TRUE	reported	igd
489	7	72923338	-0.095721	0.013229	7.09e-13	20527	met-c-891	rs34437827	G	A	0.183461	Phospholipids in large VLDL || id:met-c-891	TRUE	reported	igd
490	8	19851508	-0.156154	0.017546	1.06e-18	21237	met-c-891	rs76975037	A	C	0.087149	Phospholipids in large VLDL || id:met-c-891	TRUE	reported	igd
491	11	116648917	-0.210403	0.014078	9.37e-50	21237	met-c-891	rs964184	C	G	0.861799	Phospholipids in large VLDL || id:met-c-891	TRUE	reported	igd
492	16	56993886	-0.068488	0.011719	6.73e-09	21237	met-c-891	rs821840	G	A	0.263989	Phospholipids in large VLDL || id:met-c-891	TRUE	reported	igd
493	19	19477877	-0.144112	0.020954	8.96e-12	18955	met-c-891	rs56255430	C	A	0.064574	Phospholipids in large VLDL || id:met-c-891	TRUE	reported	igd
494	19	45416741	0.094881	0.012171	1.05e-14	21235	met-c-891	rs438811	T	C	0.233751	Phospholipids in large VLDL || id:met-c-891	TRUE	reported	igd
495	1	110232983	-0.0256038	0.00448226	1.29999e-08	NA	met-d-XL_VLDL_FC_pct	rs140584594	G	A	0.730126	Free cholesterol to total lipids ratio in very large VLDL || id:met-d-XL_VLDL_FC_pct	TRUE	reported	igd
496	1	230302838	-0.0254172	0.00415367	4.60002e-10	NA	met-d-XL_VLDL_FC_pct	rs59484402	C	CT	0.388499	Free cholesterol to total lipids ratio in very large VLDL || id:met-d-XL_VLDL_FC_pct	TRUE	reported	igd
497	1	55505647	-0.216625	0.0152842	3.29989e-46	NA	met-d-XL_VLDL_FC_pct	rs11591147	T	G	0.017402	Free cholesterol to total lipids ratio in very large VLDL || id:met-d-XL_VLDL_FC_pct	TRUE	reported	igd
498	1	109821511	0.0410907	0.00484794	1.50003e-17	NA	met-d-XL_VLDL_FC_pct	rs602633	G	T	0.783089	Free cholesterol to total lipids ratio in very large VLDL || id:met-d-XL_VLDL_FC_pct	TRUE	reported	igd
499	2	44055510	-0.0556981	0.00840076	2.90001e-11	NA	met-d-XL_VLDL_FC_pct	rs114938914	T	C	0.061296	Free cholesterol to total lipids ratio in very large VLDL || id:met-d-XL_VLDL_FC_pct	TRUE	reported	igd
500	2	227112754	-0.0355117	0.00417344	1.80011e-17	NA	met-d-XL_VLDL_FC_pct	rs2943654	T	C	0.64523	Free cholesterol to total lipids ratio in very large VLDL || id:met-d-XL_VLDL_FC_pct	TRUE	reported	igd
501	2	27730940	0.0775667	0.00408971	1.80011e-81	NA	met-d-XL_VLDL_FC_pct	rs1260326	C	T	0.603802	Free cholesterol to total lipids ratio in very large VLDL || id:met-d-XL_VLDL_FC_pct	TRUE	reported	igd
502	2	21267461	0.0489112	0.00423079	4.60045e-31	NA	met-d-XL_VLDL_FC_pct	rs934197	A	G	0.336072	Free cholesterol to total lipids ratio in very large VLDL || id:met-d-XL_VLDL_FC_pct	TRUE	reported	igd
503	2	121337280	0.0327271	0.00547576	3.79997e-09	NA	met-d-XL_VLDL_FC_pct	rs9677933	T	C	0.15864	Free cholesterol to total lipids ratio in very large VLDL || id:met-d-XL_VLDL_FC_pct	TRUE	reported	igd
504	2	165514409	-0.0296626	0.00421447	5.40008e-13	NA	met-d-XL_VLDL_FC_pct	rs11394662	A	AT	0.615516	Free cholesterol to total lipids ratio in very large VLDL || id:met-d-XL_VLDL_FC_pct	TRUE	reported	igd
505	3	186332182	0.0231011	0.00416553	2.1e-08	NA	met-d-XL_VLDL_FC_pct	rs2518134	T	C	0.632615	Free cholesterol to total lipids ratio in very large VLDL || id:met-d-XL_VLDL_FC_pct	TRUE	reported	igd
506	4	103895398	0.0225666	0.00399932	2.69998e-08	NA	met-d-XL_VLDL_FC_pct	rs7659650	A	T	0.490625	Free cholesterol to total lipids ratio in very large VLDL || id:met-d-XL_VLDL_FC_pct	TRUE	reported	igd
507	4	3365381	-0.0251959	0.00408301	5.30005e-10	NA	met-d-XL_VLDL_FC_pct	rs881817	G	A	0.593655	Free cholesterol to total lipids ratio in very large VLDL || id:met-d-XL_VLDL_FC_pct	TRUE	reported	igd
508	5	74472939	0.0268857	0.0041712	1.6e-10	NA	met-d-XL_VLDL_FC_pct	rs7707394	A	G	0.35721	Free cholesterol to total lipids ratio in very large VLDL || id:met-d-XL_VLDL_FC_pct	TRUE	reported	igd
509	5	74619639	0.038065	0.00422712	1.9002e-19	NA	met-d-XL_VLDL_FC_pct	rs79225634	T	C	0.340495	Free cholesterol to total lipids ratio in very large VLDL || id:met-d-XL_VLDL_FC_pct	TRUE	reported	igd
510	5	55804552	-0.0357625	0.00476864	4.40048e-15	NA	met-d-XL_VLDL_FC_pct	rs40270	C	A	0.771809	Free cholesterol to total lipids ratio in very large VLDL || id:met-d-XL_VLDL_FC_pct	TRUE	reported	igd
511	5	55868097	-0.0322066	0.00451736	2.90001e-13	NA	met-d-XL_VLDL_FC_pct	rs13179413	T	C	0.285582	Free cholesterol to total lipids ratio in very large VLDL || id:met-d-XL_VLDL_FC_pct	TRUE	reported	igd
512	6	160922870	0.19512	0.0149173	7.89951e-39	NA	met-d-XL_VLDL_FC_pct	rs117733303	G	A	0.018322	Free cholesterol to total lipids ratio in very large VLDL || id:met-d-XL_VLDL_FC_pct	TRUE	reported	igd
513	6	32624128	-0.0334219	0.00527751	7.10003e-10	NA	met-d-XL_VLDL_FC_pct	rs184252375	T	C	0.311396	Free cholesterol to total lipids ratio in very large VLDL || id:met-d-XL_VLDL_FC_pct	TRUE	reported	igd
514	6	127448249	-0.0213551	0.00401932	2.69998e-08	NA	met-d-XL_VLDL_FC_pct	rs1936807	G	C	0.519116	Free cholesterol to total lipids ratio in very large VLDL || id:met-d-XL_VLDL_FC_pct	TRUE	reported	igd
515	6	161010118	0.153664	0.00742735	2.09991e-96	NA	met-d-XL_VLDL_FC_pct	rs10455872	G	A	0.078788	Free cholesterol to total lipids ratio in very large VLDL || id:met-d-XL_VLDL_FC_pct	TRUE	reported	igd
516	6	32603825	-0.0406341	0.00418527	5.50047e-23	NA	met-d-XL_VLDL_FC_pct	rs3129774	T	C	0.440101	Free cholesterol to total lipids ratio in very large VLDL || id:met-d-XL_VLDL_FC_pct	TRUE	reported	igd
517	6	43758873	-0.028619	0.00403146	2.29985e-12	NA	met-d-XL_VLDL_FC_pct	rs6905288	A	G	0.568486	Free cholesterol to total lipids ratio in very large VLDL || id:met-d-XL_VLDL_FC_pct	TRUE	reported	igd
518	6	160710851	0.038799	0.0055026	1.20005e-12	NA	met-d-XL_VLDL_FC_pct	rs3127580	T	C	0.156168	Free cholesterol to total lipids ratio in very large VLDL || id:met-d-XL_VLDL_FC_pct	TRUE	reported	igd
519	6	161017363	0.0800265	0.0111614	2.09991e-13	NA	met-d-XL_VLDL_FC_pct	rs73596816	A	G	0.033481	Free cholesterol to total lipids ratio in very large VLDL || id:met-d-XL_VLDL_FC_pct	TRUE	reported	igd
520	7	1029585	-0.0300635	0.00412313	3.90032e-14	NA	met-d-XL_VLDL_FC_pct	rs9769088	C	T	0.390985	Free cholesterol to total lipids ratio in very large VLDL || id:met-d-XL_VLDL_FC_pct	TRUE	reported	igd
521	7	73033559	0.104826	0.00594759	1.59993e-70	NA	met-d-XL_VLDL_FC_pct	rs34062580	A	G	0.130223	Free cholesterol to total lipids ratio in very large VLDL || id:met-d-XL_VLDL_FC_pct	TRUE	reported	igd
522	7	25983400	0.0282347	0.00418064	1.20005e-12	NA	met-d-XL_VLDL_FC_pct	rs56001710	T	A	0.580553	Free cholesterol to total lipids ratio in very large VLDL || id:met-d-XL_VLDL_FC_pct	TRUE	reported	igd
523	7	28256240	0.0283434	0.00416434	6.70039e-12	NA	met-d-XL_VLDL_FC_pct	rs498475	A	G	0.63062	Free cholesterol to total lipids ratio in very large VLDL || id:met-d-XL_VLDL_FC_pct	TRUE	reported	igd
524	8	19819328	0.0796337	0.00665401	1.99986e-33	NA	met-d-XL_VLDL_FC_pct	rs325	C	T	0.100149	Free cholesterol to total lipids ratio in very large VLDL || id:met-d-XL_VLDL_FC_pct	TRUE	reported	igd
525	8	11133175	-0.0342302	0.0040811	6.4003e-17	NA	met-d-XL_VLDL_FC_pct	rs12677504	A	G	0.587881	Free cholesterol to total lipids ratio in very large VLDL || id:met-d-XL_VLDL_FC_pct	TRUE	reported	igd
526	8	126507389	0.0331568	0.00436405	2.29985e-14	NA	met-d-XL_VLDL_FC_pct	rs2954038	A	C	0.69862	Free cholesterol to total lipids ratio in very large VLDL || id:met-d-XL_VLDL_FC_pct	TRUE	reported	igd
527	9	136141870	0.0568352	0.00517353	2.49977e-28	NA	met-d-XL_VLDL_FC_pct	rs2519093	T	C	0.183641	Free cholesterol to total lipids ratio in very large VLDL || id:met-d-XL_VLDL_FC_pct	TRUE	reported	igd
528	10	65104500	0.0312423	0.00408411	2.29985e-15	NA	met-d-XL_VLDL_FC_pct	rs7896518	G	A	0.428258	Free cholesterol to total lipids ratio in very large VLDL || id:met-d-XL_VLDL_FC_pct	TRUE	reported	igd
529	10	95342772	-0.037959	0.00633494	8.30004e-10	NA	met-d-XL_VLDL_FC_pct	rs7091593	T	A	0.113964	Free cholesterol to total lipids ratio in very large VLDL || id:met-d-XL_VLDL_FC_pct	TRUE	reported	igd
530	11	5701074	0.0431663	0.00779464	5.89997e-09	NA	met-d-XL_VLDL_FC_pct	rs11601507	A	C	0.069239	Free cholesterol to total lipids ratio in very large VLDL || id:met-d-XL_VLDL_FC_pct	TRUE	reported	igd
531	11	61552680	-0.0690993	0.00420602	2.09991e-63	NA	met-d-XL_VLDL_FC_pct	rs174537	T	G	0.343423	Free cholesterol to total lipids ratio in very large VLDL || id:met-d-XL_VLDL_FC_pct	TRUE	reported	igd
532	11	116916060	-0.126118	0.0202188	2.80001e-10	NA	met-d-XL_VLDL_FC_pct	rs144018203	C	G	0.010701	Free cholesterol to total lipids ratio in very large VLDL || id:met-d-XL_VLDL_FC_pct	TRUE	reported	igd
533	11	116648917	0.0951564	0.00589343	4.19952e-60	NA	met-d-XL_VLDL_FC_pct	rs964184	C	G	0.8669	Free cholesterol to total lipids ratio in very large VLDL || id:met-d-XL_VLDL_FC_pct	TRUE	reported	igd
534	11	63957835	-0.0490743	0.00851379	1.40001e-09	NA	met-d-XL_VLDL_FC_pct	rs11231721	A	G	0.05894	Free cholesterol to total lipids ratio in very large VLDL || id:met-d-XL_VLDL_FC_pct	TRUE	reported	igd
535	11	65473798	-0.0278944	0.00440996	1.09999e-10	NA	met-d-XL_VLDL_FC_pct	rs10750766	A	C	0.709828	Free cholesterol to total lipids ratio in very large VLDL || id:met-d-XL_VLDL_FC_pct	TRUE	reported	igd
536	12	4384844	0.0883939	0.0155752	1.2e-08	NA	met-d-XL_VLDL_FC_pct	rs76895963	G	T	0.020546	Free cholesterol to total lipids ratio in very large VLDL || id:met-d-XL_VLDL_FC_pct	TRUE	reported	igd
537	12	112013941	-0.0273571	0.00476154	7.29995e-09	NA	met-d-XL_VLDL_FC_pct	rs61941261	C	T	0.738674	Free cholesterol to total lipids ratio in very large VLDL || id:met-d-XL_VLDL_FC_pct	TRUE	reported	igd
538	14	94844947	0.0994418	0.0143351	1.10002e-11	NA	met-d-XL_VLDL_FC_pct	rs28929474	T	C	0.019986	Free cholesterol to total lipids ratio in very large VLDL || id:met-d-XL_VLDL_FC_pct	TRUE	reported	igd
539	15	58683366	-0.0836243	0.00411138	1.99986e-94	NA	met-d-XL_VLDL_FC_pct	rs1532085	G	A	0.614244	Free cholesterol to total lipids ratio in very large VLDL || id:met-d-XL_VLDL_FC_pct	TRUE	reported	igd
540	15	58602300	0.026316	0.00401475	2.29985e-11	NA	met-d-XL_VLDL_FC_pct	rs261265	A	C	0.454492	Free cholesterol to total lipids ratio in very large VLDL || id:met-d-XL_VLDL_FC_pct	TRUE	reported	igd
541	15	43685807	-0.0751368	0.0122128	1e-09	NA	met-d-XL_VLDL_FC_pct	rs149181595	C	A	0.027636	Free cholesterol to total lipids ratio in very large VLDL || id:met-d-XL_VLDL_FC_pct	TRUE	reported	igd
542	15	58723479	0.106584	0.00484937	2.19786e-110	NA	met-d-XL_VLDL_FC_pct	rs1077834	C	T	0.218272	Free cholesterol to total lipids ratio in very large VLDL || id:met-d-XL_VLDL_FC_pct	TRUE	reported	igd
543	16	56991363	-0.0698738	0.00428096	2.70023e-60	NA	met-d-XL_VLDL_FC_pct	rs183130	T	C	0.323378	Free cholesterol to total lipids ratio in very large VLDL || id:met-d-XL_VLDL_FC_pct	TRUE	reported	igd
544	16	72144174	-0.0353552	0.00517127	3.40017e-12	NA	met-d-XL_VLDL_FC_pct	rs9302635	C	T	0.182341	Free cholesterol to total lipids ratio in very large VLDL || id:met-d-XL_VLDL_FC_pct	TRUE	reported	igd
545	16	81534790	0.0261109	0.00436043	7.49998e-09	NA	met-d-XL_VLDL_FC_pct	rs2925979	C	T	0.698795	Free cholesterol to total lipids ratio in very large VLDL || id:met-d-XL_VLDL_FC_pct	TRUE	reported	igd
546	16	15148646	0.026299	0.00439319	8.99995e-10	NA	met-d-XL_VLDL_FC_pct	rs11075253	A	C	0.295607	Free cholesterol to total lipids ratio in very large VLDL || id:met-d-XL_VLDL_FC_pct	TRUE	reported	igd
547	17	64210580	0.127919	0.0116464	5.70033e-29	NA	met-d-XL_VLDL_FC_pct	rs1801689	C	A	0.03045	Free cholesterol to total lipids ratio in very large VLDL || id:met-d-XL_VLDL_FC_pct	TRUE	reported	igd
548	17	67081278	0.138592	0.0134621	2.80027e-25	NA	met-d-XL_VLDL_FC_pct	rs77542162	G	A	0.022653	Free cholesterol to total lipids ratio in very large VLDL || id:met-d-XL_VLDL_FC_pct	TRUE	reported	igd
549	17	41163974	-0.0542758	0.00912843	1.79999e-09	NA	met-d-XL_VLDL_FC_pct	rs111351217	A	G	0.052285	Free cholesterol to total lipids ratio in very large VLDL || id:met-d-XL_VLDL_FC_pct	TRUE	reported	igd
550	17	41926126	-0.0830648	0.0114588	1.10002e-13	NA	met-d-XL_VLDL_FC_pct	rs72836561	T	C	0.031484	Free cholesterol to total lipids ratio in very large VLDL || id:met-d-XL_VLDL_FC_pct	TRUE	reported	igd
551	19	11192915	-0.0933562	0.00614138	2.29985e-55	NA	met-d-XL_VLDL_FC_pct	rs73015021	G	A	0.120615	Free cholesterol to total lipids ratio in very large VLDL || id:met-d-XL_VLDL_FC_pct	TRUE	reported	igd
552	19	45337918	0.0862332	0.010978	5.60015e-16	NA	met-d-XL_VLDL_FC_pct	rs147711004	A	G	0.036042	Free cholesterol to total lipids ratio in very large VLDL || id:met-d-XL_VLDL_FC_pct	TRUE	reported	igd
553	19	7193981	0.0256103	0.00443807	2.19999e-09	NA	met-d-XL_VLDL_FC_pct	rs62111417	T	C	0.712541	Free cholesterol to total lipids ratio in very large VLDL || id:met-d-XL_VLDL_FC_pct	TRUE	reported	igd
554	19	45413233	-0.185593	0.00739944	5.70164e-139	NA	met-d-XL_VLDL_FC_pct	rs1065853	T	G	0.080138	Free cholesterol to total lipids ratio in very large VLDL || id:met-d-XL_VLDL_FC_pct	TRUE	reported	igd
555	19	11272727	0.0277237	0.00427528	1.99986e-11	NA	met-d-XL_VLDL_FC_pct	rs111427795	G	T	0.327965	Free cholesterol to total lipids ratio in very large VLDL || id:met-d-XL_VLDL_FC_pct	TRUE	reported	igd
556	19	45173951	-0.0569267	0.00930694	9.69996e-10	NA	met-d-XL_VLDL_FC_pct	rs28807203	C	A	0.049067	Free cholesterol to total lipids ratio in very large VLDL || id:met-d-XL_VLDL_FC_pct	TRUE	reported	igd
557	20	44559748	-0.0973076	0.00514709	1.9002e-83	NA	met-d-XL_VLDL_FC_pct	rs139953093	T	G	0.186265	Free cholesterol to total lipids ratio in very large VLDL || id:met-d-XL_VLDL_FC_pct	TRUE	reported	igd
558	20	17844684	-0.0249187	0.0042279	3.29997e-09	NA	met-d-XL_VLDL_FC_pct	rs2618566	T	G	0.660278	Free cholesterol to total lipids ratio in very large VLDL || id:met-d-XL_VLDL_FC_pct	TRUE	reported	igd
559	22	44324730	0.0264311	0.00485974	2.69998e-08	NA	met-d-XL_VLDL_FC_pct	rs738408	T	C	0.216633	Free cholesterol to total lipids ratio in very large VLDL || id:met-d-XL_VLDL_FC_pct	TRUE	reported	igd
560	1	27021913	0.107371	0.0133989	2.8e-15	NA	met-d-L_VLDL_FC	rs114165349	C	G	0.022956	Free cholesterol in large VLDL || id:met-d-L_VLDL_FC	TRUE	reported	igd
561	1	63060037	0.073842	0.00417889	1.8e-72	NA	met-d-L_VLDL_FC	rs79439217	T	TAAGAA	0.647276	Free cholesterol in large VLDL || id:met-d-L_VLDL_FC	TRUE	reported	igd
562	1	109822166	0.0419838	0.00475122	1.4e-19	NA	met-d-L_VLDL_FC	rs599839	A	G	0.772085	Free cholesterol in large VLDL || id:met-d-L_VLDL_FC	TRUE	reported	igd
563	1	230296153	-0.0452133	0.00408766	2.9e-29	NA	met-d-L_VLDL_FC	rs10864726	T	C	0.605466	Free cholesterol in large VLDL || id:met-d-L_VLDL_FC	TRUE	reported	igd
564	2	21531266	-0.0302717	0.0040929	2.2e-13	NA	met-d-L_VLDL_FC	rs1510606	A	G	0.396984	Free cholesterol in large VLDL || id:met-d-L_VLDL_FC	TRUE	reported	igd
565	2	27730940	-0.0886722	0.00408	1.1e-108	NA	met-d-L_VLDL_FC	rs1260326	C	T	0.603982	Free cholesterol in large VLDL || id:met-d-L_VLDL_FC	TRUE	reported	igd
566	2	219699999	0.0584569	0.0103362	7.5e-09	NA	met-d-L_VLDL_FC	rs78058190	A	G	0.0501	Free cholesterol in large VLDL || id:met-d-L_VLDL_FC	TRUE	reported	igd
567	2	227093585	0.0360061	0.00417841	5.6e-18	NA	met-d-L_VLDL_FC	rs2943640	C	A	0.651849	Free cholesterol in large VLDL || id:met-d-L_VLDL_FC	TRUE	reported	igd
568	2	165528876	-0.0487416	0.00408908	7.4e-34	NA	met-d-L_VLDL_FC	rs13389219	T	C	0.392528	Free cholesterol in large VLDL || id:met-d-L_VLDL_FC	TRUE	reported	igd
569	2	21231524	-0.111208	0.00492235	6.4e-115	NA	met-d-L_VLDL_FC	rs676210	A	G	0.205765	Free cholesterol in large VLDL || id:met-d-L_VLDL_FC	TRUE	reported	igd
570	3	52838654	-0.0367906	0.00612481	6e-09	NA	met-d-L_VLDL_FC	rs9968117	T	C	0.120934	Free cholesterol in large VLDL || id:met-d-L_VLDL_FC	TRUE	reported	igd
571	3	135956305	0.0345395	0.00472947	4.9e-14	NA	met-d-L_VLDL_FC	rs684773	C	A	0.767067	Free cholesterol in large VLDL || id:met-d-L_VLDL_FC	TRUE	reported	igd
572	4	15099148	0.0229905	0.0042411	1.4e-08	NA	met-d-L_VLDL_FC	rs1823949	C	T	0.663511	Free cholesterol in large VLDL || id:met-d-L_VLDL_FC	TRUE	reported	igd
573	4	87976359	0.0317343	0.00410037	6.6e-16	NA	met-d-L_VLDL_FC	rs1471251	T	A	0.397126	Free cholesterol in large VLDL || id:met-d-L_VLDL_FC	TRUE	reported	igd
574	4	3443931	-0.0367992	0.00413623	6.1e-20	NA	met-d-L_VLDL_FC	rs13108218	G	A	0.615355	Free cholesterol in large VLDL || id:met-d-L_VLDL_FC	TRUE	reported	igd
575	4	171563776	-0.0266644	0.00470057	5e-09	NA	met-d-L_VLDL_FC	rs4491981	A	C	0.241217	Free cholesterol in large VLDL || id:met-d-L_VLDL_FC	TRUE	reported	igd
576	5	55857025	-0.0554161	0.00509217	1e-27	NA	met-d-L_VLDL_FC	rs11429307	G	GT	0.808481	Free cholesterol in large VLDL || id:met-d-L_VLDL_FC	TRUE	reported	igd
577	5	74656539	0.0265667	0.00407905	4.7e-11	NA	met-d-L_VLDL_FC	rs12916	C	T	0.400342	Free cholesterol in large VLDL || id:met-d-L_VLDL_FC	TRUE	reported	igd
578	5	57610069	-0.0220224	0.00410406	1.1e-08	NA	met-d-L_VLDL_FC	rs37538	C	G	0.602796	Free cholesterol in large VLDL || id:met-d-L_VLDL_FC	TRUE	reported	igd
579	5	156443066	0.0400923	0.00416789	1.5e-23	NA	met-d-L_VLDL_FC	rs4704834	G	A	0.644037	Free cholesterol in large VLDL || id:met-d-L_VLDL_FC	TRUE	reported	igd
580	6	160521885	0.0561505	0.00763518	2.6e-14	NA	met-d-L_VLDL_FC	rs146203232	T	C	0.07466	Free cholesterol in large VLDL || id:met-d-L_VLDL_FC	TRUE	reported	igd
581	6	32586831	0.0446937	0.00430195	4e-24	NA	met-d-L_VLDL_FC	rs13191810	T	C	0.312294	Free cholesterol in large VLDL || id:met-d-L_VLDL_FC	TRUE	reported	igd
582	6	43757896	0.0332312	0.00399607	4.9e-17	NA	met-d-L_VLDL_FC	rs998584	A	C	0.482334	Free cholesterol in large VLDL || id:met-d-L_VLDL_FC	TRUE	reported	igd
583	6	127455029	0.0338579	0.00400477	1e-18	NA	met-d-L_VLDL_FC	rs2186037	G	A	0.51879	Free cholesterol in large VLDL || id:met-d-L_VLDL_FC	TRUE	reported	igd
584	6	139834012	-0.0355113	0.00412877	9.4e-18	NA	met-d-L_VLDL_FC	rs632057	G	T	0.627779	Free cholesterol in large VLDL || id:met-d-L_VLDL_FC	TRUE	reported	igd
585	6	161091952	0.0523984	0.00893517	3.4e-09	NA	met-d-L_VLDL_FC	rs12055389	T	C	0.054089	Free cholesterol in large VLDL || id:met-d-L_VLDL_FC	TRUE	reported	igd
586	6	32623528	0.0341477	0.00589893	3.9e-10	NA	met-d-L_VLDL_FC	rs73732214	A	G	0.140432	Free cholesterol in large VLDL || id:met-d-L_VLDL_FC	TRUE	reported	igd
587	6	160922870	-0.264294	0.0148059	2.8e-71	NA	met-d-L_VLDL_FC	rs117733303	G	A	0.0185	Free cholesterol in large VLDL || id:met-d-L_VLDL_FC	TRUE	reported	igd
588	6	161010118	-0.146308	0.0073985	2.2e-89	NA	met-d-L_VLDL_FC	rs10455872	G	A	0.07899	Free cholesterol in large VLDL || id:met-d-L_VLDL_FC	TRUE	reported	igd
589	7	25983400	-0.0234859	0.0041739	4.4e-09	NA	met-d-L_VLDL_FC	rs56001710	T	A	0.58058	Free cholesterol in large VLDL || id:met-d-L_VLDL_FC	TRUE	reported	igd
590	7	130433594	0.0338313	0.00431264	9.3e-15	NA	met-d-L_VLDL_FC	rs11976955	G	C	0.314213	Free cholesterol in large VLDL || id:met-d-L_VLDL_FC	TRUE	reported	igd
591	7	72823777	0.092791	0.0147249	1.8e-10	NA	met-d-L_VLDL_FC	rs42125	G	A	0.023006	Free cholesterol in large VLDL || id:met-d-L_VLDL_FC	TRUE	reported	igd
592	7	73037366	-0.0931327	0.00497568	4.3e-77	NA	met-d-L_VLDL_FC	rs55747707	A	G	0.203628	Free cholesterol in large VLDL || id:met-d-L_VLDL_FC	TRUE	reported	igd
593	8	59388565	-0.0261893	0.00422793	3e-10	NA	met-d-L_VLDL_FC	rs2081687	C	T	0.663094	Free cholesterol in large VLDL || id:met-d-L_VLDL_FC	TRUE	reported	igd
594	8	126631799	0.0318753	0.00490358	2.8e-11	NA	met-d-L_VLDL_FC	rs3860847	A	G	0.212511	Free cholesterol in large VLDL || id:met-d-L_VLDL_FC	TRUE	reported	igd
595	8	11493678	0.0313169	0.0041227	9.8e-14	NA	met-d-L_VLDL_FC	rs13265201	G	C	0.396268	Free cholesterol in large VLDL || id:met-d-L_VLDL_FC	TRUE	reported	igd
596	8	19733244	-0.0625495	0.00486737	7.5e-38	NA	met-d-L_VLDL_FC	rs1561748	C	G	0.267457	Free cholesterol in large VLDL || id:met-d-L_VLDL_FC	TRUE	reported	igd
597	8	19819724	-0.187819	0.00662575	7.29e-181	NA	met-d-L_VLDL_FC	rs328	G	C	0.10031	Free cholesterol in large VLDL || id:met-d-L_VLDL_FC	TRUE	reported	igd
598	8	126500031	-0.0848919	0.00409077	2e-100	NA	met-d-L_VLDL_FC	rs28601761	G	C	0.420164	Free cholesterol in large VLDL || id:met-d-L_VLDL_FC	TRUE	reported	igd
599	8	22875985	-0.0233312	0.00433485	4.4e-08	NA	met-d-L_VLDL_FC	rs2241260	G	A	0.314453	Free cholesterol in large VLDL || id:met-d-L_VLDL_FC	TRUE	reported	igd
600	10	94797973	-0.0278709	0.00407891	1.8e-13	NA	met-d-L_VLDL_FC	rs2478236	A	G	0.403779	Free cholesterol in large VLDL || id:met-d-L_VLDL_FC	TRUE	reported	igd
601	10	99710001	0.0226044	0.00415048	2e-08	NA	met-d-L_VLDL_FC	rs201289443	G	C	0.410222	Free cholesterol in large VLDL || id:met-d-L_VLDL_FC	TRUE	reported	igd
602	10	64882300	-0.0325892	0.00402687	2e-16	NA	met-d-L_VLDL_FC	rs10761716	G	C	0.441499	Free cholesterol in large VLDL || id:met-d-L_VLDL_FC	TRUE	reported	igd
603	10	115792062	-0.0227357	0.00453426	2.7e-08	NA	met-d-L_VLDL_FC	rs2484294	A	G	0.733574	Free cholesterol in large VLDL || id:met-d-L_VLDL_FC	TRUE	reported	igd
604	11	117156893	-0.239474	0.0203179	1.7e-32	NA	met-d-L_VLDL_FC	rs1047964	T	G	0.010073	Free cholesterol in large VLDL || id:met-d-L_VLDL_FC	TRUE	reported	igd
605	11	116648917	-0.210344	0.00588763	1e-200	NA	met-d-L_VLDL_FC	rs964184	C	G	0.867255	Free cholesterol in large VLDL || id:met-d-L_VLDL_FC	TRUE	reported	igd
606	11	61603510	0.0403274	0.00418071	5e-23	NA	met-d-L_VLDL_FC	rs174576	A	C	0.350038	Free cholesterol in large VLDL || id:met-d-L_VLDL_FC	TRUE	reported	igd
607	11	116714293	0.270978	0.0211043	4.1e-41	NA	met-d-L_VLDL_FC	rs141469619	G	A	0.010141	Free cholesterol in large VLDL || id:met-d-L_VLDL_FC	TRUE	reported	igd
608	12	124409502	-0.0342007	0.00428489	1e-16	NA	met-d-L_VLDL_FC	rs7133378	A	G	0.319792	Free cholesterol in large VLDL || id:met-d-L_VLDL_FC	TRUE	reported	igd
609	12	57766392	-0.0325442	0.00467113	1.9e-12	NA	met-d-L_VLDL_FC	rs4760254	C	G	0.239057	Free cholesterol in large VLDL || id:met-d-L_VLDL_FC	TRUE	reported	igd
610	12	4384844	-0.0839179	0.0155438	3.2e-08	NA	met-d-L_VLDL_FC	rs76895963	G	T	0.020556	Free cholesterol in large VLDL || id:met-d-L_VLDL_FC	TRUE	reported	igd
611	12	124645824	0.0225176	0.00418781	3.6e-08	NA	met-d-L_VLDL_FC	rs9888360	C	G	0.365912	Free cholesterol in large VLDL || id:met-d-L_VLDL_FC	TRUE	reported	igd
612	13	114544024	0.0286242	0.00436586	6.2e-12	NA	met-d-L_VLDL_FC	rs7140110	C	T	0.299371	Free cholesterol in large VLDL || id:met-d-L_VLDL_FC	TRUE	reported	igd
613	15	43726625	0.127313	0.0126465	3.1e-25	NA	met-d-L_VLDL_FC	rs150844304	C	A	0.025676	Free cholesterol in large VLDL || id:met-d-L_VLDL_FC	TRUE	reported	igd
614	16	72108093	0.0392541	0.00510207	1.3e-15	NA	met-d-L_VLDL_FC	rs2000999	A	G	0.188616	Free cholesterol in large VLDL || id:met-d-L_VLDL_FC	TRUE	reported	igd
615	16	81520932	-0.0234431	0.00404658	1.7e-08	NA	met-d-L_VLDL_FC	rs2927320	G	A	0.562296	Free cholesterol in large VLDL || id:met-d-L_VLDL_FC	TRUE	reported	igd
616	16	56989590	-0.0830949	0.004272	1.7e-86	NA	met-d-L_VLDL_FC	rs247616	T	C	0.32471	Free cholesterol in large VLDL || id:met-d-L_VLDL_FC	TRUE	reported	igd
617	17	41926126	0.121856	0.0114448	1.2e-27	NA	met-d-L_VLDL_FC	rs72836561	T	C	0.031483	Free cholesterol in large VLDL || id:met-d-L_VLDL_FC	TRUE	reported	igd
618	17	64210580	-0.0733393	0.0116179	6.7e-11	NA	met-d-L_VLDL_FC	rs1801689	C	A	0.030531	Free cholesterol in large VLDL || id:met-d-L_VLDL_FC	TRUE	reported	igd
619	17	17431208	0.0574012	0.00872972	8e-11	NA	met-d-L_VLDL_FC	rs8078513	A	C	0.057351	Free cholesterol in large VLDL || id:met-d-L_VLDL_FC	TRUE	reported	igd
620	19	11209629	-0.0495584	0.00604275	2.2e-16	NA	met-d-L_VLDL_FC	rs73015033	A	G	0.126317	Free cholesterol in large VLDL || id:met-d-L_VLDL_FC	TRUE	reported	igd
621	19	45424514	0.0577297	0.005271	1.4e-29	NA	met-d-L_VLDL_FC	rs157592	C	A	0.185289	Free cholesterol in large VLDL || id:met-d-L_VLDL_FC	TRUE	reported	igd
622	19	8429323	-0.225512	0.0143306	1.8e-56	NA	met-d-L_VLDL_FC	rs116843064	A	G	0.019852	Free cholesterol in large VLDL || id:met-d-L_VLDL_FC	TRUE	reported	igd
623	19	8439538	-0.053953	0.00867864	3.3e-10	NA	met-d-L_VLDL_FC	rs57192995	C	G	0.056299	Free cholesterol in large VLDL || id:met-d-L_VLDL_FC	TRUE	reported	igd
624	19	19379549	-0.121236	0.0076177	1.2e-57	NA	met-d-L_VLDL_FC	rs58542926	T	C	0.074402	Free cholesterol in large VLDL || id:met-d-L_VLDL_FC	TRUE	reported	igd
625	19	45430280	0.0786218	0.00429626	3.7e-77	NA	met-d-L_VLDL_FC	rs5112	G	C	0.533746	Free cholesterol in large VLDL || id:met-d-L_VLDL_FC	TRUE	reported	igd
626	20	44576502	0.0594591	0.00514168	2.3e-32	NA	met-d-L_VLDL_FC	rs7679	C	T	0.186404	Free cholesterol in large VLDL || id:met-d-L_VLDL_FC	TRUE	reported	igd
627	20	39204644	-0.0272419	0.00426714	1.8e-11	NA	met-d-L_VLDL_FC	rs2092479	G	C	0.32623	Free cholesterol in large VLDL || id:met-d-L_VLDL_FC	TRUE	reported	igd
628	21	40569508	0.0214491	0.00414245	2.2e-08	NA	met-d-L_VLDL_FC	rs62222988	C	T	0.373877	Free cholesterol in large VLDL || id:met-d-L_VLDL_FC	TRUE	reported	igd
629	1	62960250	0.090489	0.011287	1.91e-15	21232	met-c-888	rs1168041	C	T	0.721564	Free cholesterol in large VLDL || id:met-c-888	TRUE	reported	igd
630	2	27730940	-0.094592	0.010276	7.17e-20	21238	met-c-888	rs1260326	C	T	0.639168	Free cholesterol in large VLDL || id:met-c-888	TRUE	reported	igd
631	2	21142994	-0.071452	0.010619	2.56e-11	21232	met-c-888	rs4296389	T	C	0.31298	Free cholesterol in large VLDL || id:met-c-888	TRUE	reported	igd
632	6	161010118	-0.158162	0.028087	2.38e-08	18959	met-c-888	rs10455872	G	A	0.040796	Free cholesterol in large VLDL || id:met-c-888	TRUE	reported	igd
633	7	73020337	-0.124841	0.015244	4.73e-16	21232	met-c-888	rs3812316	G	C	0.124674	Free cholesterol in large VLDL || id:met-c-888	TRUE	reported	igd
634	8	126477978	-0.057216	0.009931	1.12e-08	21234	met-c-888	rs2001945	C	G	0.561324	Free cholesterol in large VLDL || id:met-c-888	TRUE	reported	igd
635	8	19851508	-0.139798	0.017549	2.87e-15	21236	met-c-888	rs76975037	A	C	0.087147	Free cholesterol in large VLDL || id:met-c-888	TRUE	reported	igd
636	10	5989505	-0.178494	0.03182	2.69e-08	21233	met-c-888	rs41293995	A	C	0.030934	Free cholesterol in large VLDL || id:met-c-888	TRUE	reported	igd
637	11	116648917	-0.208882	0.014075	5.18e-49	21236	met-c-888	rs964184	C	G	0.861797	Free cholesterol in large VLDL || id:met-c-888	TRUE	reported	igd
638	16	56993886	-0.070511	0.011721	2.47e-09	21236	met-c-888	rs821840	G	A	0.263986	Free cholesterol in large VLDL || id:met-c-888	TRUE	reported	igd
639	19	19366632	-0.156514	0.021142	2.17e-13	21235	met-c-888	rs72999033	T	C	0.059373	Free cholesterol in large VLDL || id:met-c-888	TRUE	reported	igd
640	19	45416741	0.092509	0.012171	4.92e-14	21234	met-c-888	rs438811	T	C	0.23375	Free cholesterol in large VLDL || id:met-c-888	TRUE	reported	igd
641	1	109615481	-0.0342485	0.00587099	1.3e-08	NA	met-d-XL_VLDL_P	rs72986845	C	A	0.13555	Concentration of very large VLDL particles || id:met-d-XL_VLDL_P	TRUE	reported	igd
642	1	149866868	-0.0778131	0.0141348	3.9e-08	NA	met-d-XL_VLDL_P	rs74910819	G	T	0.029894	Concentration of very large VLDL particles || id:met-d-XL_VLDL_P	TRUE	reported	igd
643	1	63060037	0.0741196	0.00415256	7.4e-74	NA	met-d-XL_VLDL_P	rs79439217	T	TAAGAA	0.647276	Concentration of very large VLDL particles || id:met-d-XL_VLDL_P	TRUE	reported	igd
644	1	27284913	0.108407	0.0131792	7.5e-16	NA	met-d-XL_VLDL_P	rs79598313	T	C	0.023202	Concentration of very large VLDL particles || id:met-d-XL_VLDL_P	TRUE	reported	igd
645	1	230303848	-0.0452527	0.00407133	3.2e-30	NA	met-d-XL_VLDL_P	rs1546954	G	T	0.612651	Concentration of very large VLDL particles || id:met-d-XL_VLDL_P	TRUE	reported	igd
646	2	21530659	-0.0249595	0.00405071	1.3e-09	NA	met-d-XL_VLDL_P	rs60960031	A	G	0.402844	Concentration of very large VLDL particles || id:met-d-XL_VLDL_P	TRUE	reported	igd
647	2	219699999	0.0655352	0.0102712	4.3e-11	NA	met-d-XL_VLDL_P	rs78058190	A	G	0.0501	Concentration of very large VLDL particles || id:met-d-XL_VLDL_P	TRUE	reported	igd
648	2	227104111	0.039807	0.00415219	4.4e-22	NA	met-d-XL_VLDL_P	rs2972140	C	T	0.650638	Concentration of very large VLDL particles || id:met-d-XL_VLDL_P	TRUE	reported	igd
649	2	21231524	-0.0996573	0.0048914	2.4e-94	NA	met-d-XL_VLDL_P	rs676210	A	G	0.205765	Concentration of very large VLDL particles || id:met-d-XL_VLDL_P	TRUE	reported	igd
650	2	25592918	-0.0237319	0.00427715	3.2e-08	NA	met-d-XL_VLDL_P	rs11903847	C	T	0.665068	Concentration of very large VLDL particles || id:met-d-XL_VLDL_P	TRUE	reported	igd
651	2	27730940	-0.0918114	0.00405435	2.7e-118	NA	met-d-XL_VLDL_P	rs1260326	C	T	0.603982	Concentration of very large VLDL particles || id:met-d-XL_VLDL_P	TRUE	reported	igd
652	2	165528876	-0.0505583	0.00406337	4.3e-37	NA	met-d-XL_VLDL_P	rs13389219	T	C	0.392528	Concentration of very large VLDL particles || id:met-d-XL_VLDL_P	TRUE	reported	igd
653	3	135956305	0.0357098	0.00469965	3.7e-15	NA	met-d-XL_VLDL_P	rs684773	C	A	0.767067	Concentration of very large VLDL particles || id:met-d-XL_VLDL_P	TRUE	reported	igd
654	3	52838654	-0.0350522	0.0060862	1.8e-08	NA	met-d-XL_VLDL_P	rs9968117	T	C	0.120934	Concentration of very large VLDL particles || id:met-d-XL_VLDL_P	TRUE	reported	igd
655	3	150097635	0.0421949	0.00787857	8.5e-09	NA	met-d-XL_VLDL_P	rs9844972	C	G	0.070765	Concentration of very large VLDL particles || id:met-d-XL_VLDL_P	TRUE	reported	igd
656	4	171563776	-0.0270499	0.00467099	1.6e-09	NA	met-d-XL_VLDL_P	rs4491981	A	C	0.241217	Concentration of very large VLDL particles || id:met-d-XL_VLDL_P	TRUE	reported	igd
657	4	3443931	-0.0348559	0.00411021	1.4e-18	NA	met-d-XL_VLDL_P	rs13108218	G	A	0.615355	Concentration of very large VLDL particles || id:met-d-XL_VLDL_P	TRUE	reported	igd
658	4	87976359	0.0321313	0.00407458	1.7e-16	NA	met-d-XL_VLDL_P	rs1471251	T	A	0.397126	Concentration of very large VLDL particles || id:met-d-XL_VLDL_P	TRUE	reported	igd
659	4	15105312	0.0229474	0.00421662	1.8e-08	NA	met-d-XL_VLDL_P	rs4698315	C	G	0.66337	Concentration of very large VLDL particles || id:met-d-XL_VLDL_P	TRUE	reported	igd
660	5	55857025	-0.0573612	0.0050603	1.1e-29	NA	met-d-XL_VLDL_P	rs11429307	G	GT	0.808481	Concentration of very large VLDL particles || id:met-d-XL_VLDL_P	TRUE	reported	igd
661	5	67513457	-0.0271087	0.00495158	1.2e-08	NA	met-d-XL_VLDL_P	rs13186403	T	G	0.215247	Concentration of very large VLDL particles || id:met-d-XL_VLDL_P	TRUE	reported	igd
662	5	156443066	0.0364597	0.0041418	3.7e-20	NA	met-d-XL_VLDL_P	rs4704834	G	A	0.644037	Concentration of very large VLDL particles || id:met-d-XL_VLDL_P	TRUE	reported	igd
663	6	31236679	0.0252576	0.00452241	2.8e-08	NA	met-d-XL_VLDL_P	rs1130580	C	T	0.289862	Concentration of very large VLDL particles || id:met-d-XL_VLDL_P	TRUE	reported	igd
664	6	32586831	0.0418408	0.00427312	2.6e-22	NA	met-d-XL_VLDL_P	rs13191810	T	C	0.312294	Concentration of very large VLDL particles || id:met-d-XL_VLDL_P	TRUE	reported	igd
665	6	160545046	0.0590223	0.00978003	2.1e-10	NA	met-d-XL_VLDL_P	rs111909590	T	C	0.043581	Concentration of very large VLDL particles || id:met-d-XL_VLDL_P	TRUE	reported	igd
666	6	43757896	0.0330773	0.00396929	4.4e-17	NA	met-d-XL_VLDL_P	rs998584	A	C	0.482334	Concentration of very large VLDL particles || id:met-d-XL_VLDL_P	TRUE	reported	igd
667	6	161010118	-0.179937	0.00734892	3e-135	NA	met-d-XL_VLDL_P	rs10455872	G	A	0.07899	Concentration of very large VLDL particles || id:met-d-XL_VLDL_P	TRUE	reported	igd
668	6	139834012	-0.036105	0.00410111	9.9e-19	NA	met-d-XL_VLDL_P	rs632057	G	T	0.627779	Concentration of very large VLDL particles || id:met-d-XL_VLDL_P	TRUE	reported	igd
669	6	32623528	0.0357383	0.0058594	7.9e-11	NA	met-d-XL_VLDL_P	rs73732214	A	G	0.140432	Concentration of very large VLDL particles || id:met-d-XL_VLDL_P	TRUE	reported	igd
670	6	160922870	-0.299669	0.0147067	2.1e-92	NA	met-d-XL_VLDL_P	rs117733303	G	A	0.0185	Concentration of very large VLDL particles || id:met-d-XL_VLDL_P	TRUE	reported	igd
671	6	161017363	-0.0996348	0.0110376	4.2e-19	NA	met-d-XL_VLDL_P	rs73596816	A	G	0.033595	Concentration of very large VLDL particles || id:met-d-XL_VLDL_P	TRUE	reported	igd
672	6	127455029	0.0336041	0.00397794	1.9e-18	NA	met-d-XL_VLDL_P	rs2186037	G	A	0.51879	Concentration of very large VLDL particles || id:met-d-XL_VLDL_P	TRUE	reported	igd
673	7	25983400	-0.0277441	0.00414753	2.3e-12	NA	met-d-XL_VLDL_P	rs56001710	T	A	0.58058	Concentration of very large VLDL particles || id:met-d-XL_VLDL_P	TRUE	reported	igd
674	7	130433594	0.0337392	0.0042854	1.7e-15	NA	met-d-XL_VLDL_P	rs11976955	G	C	0.314213	Concentration of very large VLDL particles || id:met-d-XL_VLDL_P	TRUE	reported	igd
675	7	73025975	-0.115362	0.00590949	3.7e-84	NA	met-d-XL_VLDL_P	rs13234131	G	A	0.129426	Concentration of very large VLDL particles || id:met-d-XL_VLDL_P	TRUE	reported	igd
676	7	73123473	0.0711102	0.00921491	1.7e-14	NA	met-d-XL_VLDL_P	rs72555385	G	A	0.04931	Concentration of very large VLDL particles || id:met-d-XL_VLDL_P	TRUE	reported	igd
677	8	11493678	0.0321478	0.00409596	6e-15	NA	met-d-XL_VLDL_P	rs13265201	G	C	0.396268	Concentration of very large VLDL particles || id:met-d-XL_VLDL_P	TRUE	reported	igd
678	8	19733244	-0.0646124	0.0048358	2.4e-40	NA	met-d-XL_VLDL_P	rs1561748	C	G	0.267457	Concentration of very large VLDL particles || id:met-d-XL_VLDL_P	TRUE	reported	igd
679	8	19819724	-0.191333	0.00658277	2.8e-190	NA	met-d-XL_VLDL_P	rs328	G	C	0.10031	Concentration of very large VLDL particles || id:met-d-XL_VLDL_P	TRUE	reported	igd
680	8	59388565	-0.0250818	0.00420051	1.6e-09	NA	met-d-XL_VLDL_P	rs2081687	C	T	0.663094	Concentration of very large VLDL particles || id:met-d-XL_VLDL_P	TRUE	reported	igd
681	8	22882293	-0.0236226	0.00427393	3.6e-08	NA	met-d-XL_VLDL_P	rs59296513	A	G	0.320421	Concentration of very large VLDL particles || id:met-d-XL_VLDL_P	TRUE	reported	igd
682	8	126500031	-0.0837715	0.00406424	4.6e-99	NA	met-d-XL_VLDL_P	rs28601761	G	C	0.420164	Concentration of very large VLDL particles || id:met-d-XL_VLDL_P	TRUE	reported	igd
683	8	126631799	0.0337298	0.00487178	1.1e-12	NA	met-d-XL_VLDL_P	rs3860847	A	G	0.212511	Concentration of very large VLDL particles || id:met-d-XL_VLDL_P	TRUE	reported	igd
684	10	64882300	-0.0347669	0.00400167	8.2e-19	NA	met-d-XL_VLDL_P	rs10761716	G	C	0.441499	Concentration of very large VLDL particles || id:met-d-XL_VLDL_P	TRUE	reported	igd
685	10	99710001	0.0228492	0.00412451	1.8e-08	NA	met-d-XL_VLDL_P	rs201289443	G	C	0.410222	Concentration of very large VLDL particles || id:met-d-XL_VLDL_P	TRUE	reported	igd
686	10	94797973	-0.027401	0.00405339	2.9e-13	NA	met-d-XL_VLDL_P	rs2478236	A	G	0.403779	Concentration of very large VLDL particles || id:met-d-XL_VLDL_P	TRUE	reported	igd
687	11	64004643	0.0539937	0.00949047	7e-09	NA	met-d-XL_VLDL_P	rs12294913	G	C	0.049059	Concentration of very large VLDL particles || id:met-d-XL_VLDL_P	TRUE	reported	igd
688	11	116916060	0.268739	0.020093	3.9e-44	NA	met-d-XL_VLDL_P	rs144018203	C	G	0.010654	Concentration of very large VLDL particles || id:met-d-XL_VLDL_P	TRUE	reported	igd
689	11	61575158	0.0532672	0.00417292	9.2e-39	NA	met-d-XL_VLDL_P	rs174553	G	A	0.342553	Concentration of very large VLDL particles || id:met-d-XL_VLDL_P	TRUE	reported	igd
690	11	116648917	-0.211255	0.00585029	1e-200	NA	met-d-XL_VLDL_P	rs964184	C	G	0.867255	Concentration of very large VLDL particles || id:met-d-XL_VLDL_P	TRUE	reported	igd
691	11	116389017	0.0242999	0.00433301	4.2e-08	NA	met-d-XL_VLDL_P	rs883863	A	G	0.308022	Concentration of very large VLDL particles || id:met-d-XL_VLDL_P	TRUE	reported	igd
692	11	117156893	-0.25014	0.020189	1.3e-35	NA	met-d-XL_VLDL_P	rs1047964	T	G	0.010073	Concentration of very large VLDL particles || id:met-d-XL_VLDL_P	TRUE	reported	igd
693	12	57766392	-0.031034	0.00464158	1.6e-11	NA	met-d-XL_VLDL_P	rs4760254	C	G	0.239057	Concentration of very large VLDL particles || id:met-d-XL_VLDL_P	TRUE	reported	igd
694	12	124409502	-0.03258	0.00425779	1.3e-15	NA	met-d-XL_VLDL_P	rs7133378	A	G	0.319792	Concentration of very large VLDL particles || id:met-d-XL_VLDL_P	TRUE	reported	igd
695	12	4384844	-0.0860294	0.0154455	1.1e-08	NA	met-d-XL_VLDL_P	rs76895963	G	T	0.020556	Concentration of very large VLDL particles || id:met-d-XL_VLDL_P	TRUE	reported	igd
696	13	114544024	0.0271843	0.00433849	6.6e-11	NA	met-d-XL_VLDL_P	rs7140110	C	T	0.299371	Concentration of very large VLDL particles || id:met-d-XL_VLDL_P	TRUE	reported	igd
697	13	95231825	0.0223389	0.00415382	2.8e-08	NA	met-d-XL_VLDL_P	rs2275647	A	G	0.351879	Concentration of very large VLDL particles || id:met-d-XL_VLDL_P	TRUE	reported	igd
698	15	43726625	0.133136	0.0125672	1.2e-27	NA	met-d-XL_VLDL_P	rs150844304	C	A	0.025676	Concentration of very large VLDL particles || id:met-d-XL_VLDL_P	TRUE	reported	igd
699	16	15172118	-0.0230543	0.00436278	1e-08	NA	met-d-XL_VLDL_P	rs11644601	C	T	0.296692	Concentration of very large VLDL particles || id:met-d-XL_VLDL_P	TRUE	reported	igd
700	16	56989590	-0.0675276	0.00424617	5e-59	NA	met-d-XL_VLDL_P	rs247616	T	C	0.32471	Concentration of very large VLDL particles || id:met-d-XL_VLDL_P	TRUE	reported	igd
701	16	72096227	0.0436511	0.00655343	7.1e-12	NA	met-d-XL_VLDL_P	rs34682685	A	G	0.103445	Concentration of very large VLDL particles || id:met-d-XL_VLDL_P	TRUE	reported	igd
702	16	81534790	-0.0341095	0.00432752	6.4e-16	NA	met-d-XL_VLDL_P	rs2925979	C	T	0.69893	Concentration of very large VLDL particles || id:met-d-XL_VLDL_P	TRUE	reported	igd
703	17	17434141	0.0529535	0.0082275	1.8e-10	NA	met-d-XL_VLDL_P	rs9889584	A	G	0.062205	Concentration of very large VLDL particles || id:met-d-XL_VLDL_P	TRUE	reported	igd
704	17	17538289	0.0499568	0.00863456	1.6e-08	NA	met-d-XL_VLDL_P	rs75634664	G	C	0.060203	Concentration of very large VLDL particles || id:met-d-XL_VLDL_P	TRUE	reported	igd
705	17	41926126	0.121451	0.0113732	1.7e-27	NA	met-d-XL_VLDL_P	rs72836561	T	C	0.031483	Concentration of very large VLDL particles || id:met-d-XL_VLDL_P	TRUE	reported	igd
706	17	64210580	-0.0919525	0.0115452	1.2e-16	NA	met-d-XL_VLDL_P	rs1801689	C	A	0.030531	Concentration of very large VLDL particles || id:met-d-XL_VLDL_P	TRUE	reported	igd
707	19	45430280	0.0783119	0.0042697	3.8e-78	NA	met-d-XL_VLDL_P	rs5112	G	C	0.533746	Concentration of very large VLDL particles || id:met-d-XL_VLDL_P	TRUE	reported	igd
708	19	8429323	-0.233219	0.014242	3.8e-61	NA	met-d-XL_VLDL_P	rs116843064	A	G	0.019852	Concentration of very large VLDL particles || id:met-d-XL_VLDL_P	TRUE	reported	igd
709	19	8442202	-0.0537638	0.00861926	2.2e-10	NA	met-d-XL_VLDL_P	rs62117489	A	C	0.05647	Concentration of very large VLDL particles || id:met-d-XL_VLDL_P	TRUE	reported	igd
710	19	19379549	-0.109504	0.0075706	1.2e-47	NA	met-d-XL_VLDL_P	rs58542926	T	C	0.074402	Concentration of very large VLDL particles || id:met-d-XL_VLDL_P	TRUE	reported	igd
711	19	45416178	0.0457131	0.00467685	5.5e-23	NA	met-d-XL_VLDL_P	rs483082	T	G	0.236543	Concentration of very large VLDL particles || id:met-d-XL_VLDL_P	TRUE	reported	igd
712	19	19380513	-0.105762	0.0181118	2.6e-09	NA	met-d-XL_VLDL_P	rs187429064	G	A	0.013452	Concentration of very large VLDL particles || id:met-d-XL_VLDL_P	TRUE	reported	igd
713	20	44576502	0.0548447	0.00510993	1.1e-28	NA	met-d-XL_VLDL_P	rs7679	C	T	0.186404	Concentration of very large VLDL particles || id:met-d-XL_VLDL_P	TRUE	reported	igd
714	20	39204644	-0.0246603	0.00424079	7.5e-10	NA	met-d-XL_VLDL_P	rs2092479	G	C	0.32623	Concentration of very large VLDL particles || id:met-d-XL_VLDL_P	TRUE	reported	igd
715	1	62960250	0.08195	0.0118	5.78e-12	18954	met-c-950	rs1168041	C	T	0.726644	Concentration of very large VLDL particles || id:met-c-950	TRUE	reported	igd
716	2	27730940	-0.087882	0.010711	4.17e-16	18960	met-c-950	rs1260326	C	T	0.636812	Concentration of very large VLDL particles || id:met-c-950	TRUE	reported	igd
717	6	160997118	-0.196718	0.028453	7.19e-12	18953	met-c-950	rs74617384	T	A	0.03993	Concentration of very large VLDL particles || id:met-c-950	TRUE	reported	igd
718	7	72971728	-0.10484	0.016175	1.31e-10	18440	met-c-950	rs13234157	A	C	0.122689	Concentration of very large VLDL particles || id:met-c-950	TRUE	reported	igd
719	8	19912370	-0.12298	0.017293	1.79e-12	18957	met-c-950	rs115849089	A	G	0.101349	Concentration of very large VLDL particles || id:met-c-950	TRUE	reported	igd
720	11	116648917	-0.183883	0.014627	1.16e-35	18958	met-c-950	rs964184	C	G	0.857648	Concentration of very large VLDL particles || id:met-c-950	TRUE	reported	igd
721	19	45416178	0.086284	0.014107	1.33e-09	15296	met-c-950	rs483082	T	G	0.22872	Concentration of very large VLDL particles || id:met-c-950	TRUE	reported	igd
722	19	19658472	-0.1314	0.022804	1.12e-08	15296	met-c-950	rs16996148	T	G	0.067418	Concentration of very large VLDL particles || id:met-c-950	TRUE	reported	igd
723	1	55505647	-0.236525	0.0150577	1.4e-56	NA	met-d-L_VLDL_CE_pct	rs11591147	T	G	0.017455	Cholesteryl esters to total lipids ratio in large VLDL || id:met-d-L_VLDL_CE_pct	TRUE	reported	igd
724	1	33227593	0.0375593	0.0070675	3e-08	NA	met-d-L_VLDL_CE_pct	rs61798840	A	T	0.086917	Cholesteryl esters to total lipids ratio in large VLDL || id:met-d-L_VLDL_CE_pct	TRUE	reported	igd
725	1	109817838	0.0509135	0.00480981	1.4e-25	NA	met-d-L_VLDL_CE_pct	rs660240	C	T	0.784743	Cholesteryl esters to total lipids ratio in large VLDL || id:met-d-L_VLDL_CE_pct	TRUE	reported	igd
726	1	230302838	-0.0314317	0.00409946	7.2e-15	NA	met-d-L_VLDL_CE_pct	rs59484402	C	CT	0.388314	Cholesteryl esters to total lipids ratio in large VLDL || id:met-d-L_VLDL_CE_pct	TRUE	reported	igd
727	2	227073854	-0.0374649	0.00423289	3.7e-19	NA	met-d-L_VLDL_CE_pct	rs1515098	T	C	0.680929	Cholesteryl esters to total lipids ratio in large VLDL || id:met-d-L_VLDL_CE_pct	TRUE	reported	igd
728	2	121347612	0.0304346	0.00459135	1.2e-11	NA	met-d-L_VLDL_CE_pct	rs11688682	C	G	0.271516	Cholesteryl esters to total lipids ratio in large VLDL || id:met-d-L_VLDL_CE_pct	TRUE	reported	igd
729	2	44055510	-0.0595407	0.00828233	5.5e-13	NA	met-d-L_VLDL_CE_pct	rs114938914	T	C	0.061411	Cholesteryl esters to total lipids ratio in large VLDL || id:met-d-L_VLDL_CE_pct	TRUE	reported	igd
730	2	21267461	0.0537486	0.00417638	2.7e-38	NA	met-d-L_VLDL_CE_pct	rs934197	A	G	0.33571	Cholesteryl esters to total lipids ratio in large VLDL || id:met-d-L_VLDL_CE_pct	TRUE	reported	igd
731	2	27730940	0.0672012	0.00403691	1.6e-64	NA	met-d-L_VLDL_CE_pct	rs1260326	C	T	0.603979	Cholesteryl esters to total lipids ratio in large VLDL || id:met-d-L_VLDL_CE_pct	TRUE	reported	igd
732	2	165514409	-0.0303433	0.00415822	6.9e-14	NA	met-d-L_VLDL_CE_pct	rs11394662	A	AT	0.615247	Cholesteryl esters to total lipids ratio in large VLDL || id:met-d-L_VLDL_CE_pct	TRUE	reported	igd
733	3	12360357	-0.0362818	0.00603062	2.1e-09	NA	met-d-L_VLDL_CE_pct	rs35408322	G	GT	0.875453	Cholesteryl esters to total lipids ratio in large VLDL || id:met-d-L_VLDL_CE_pct	TRUE	reported	igd
734	5	55804552	-0.0360202	0.00470584	9.6e-16	NA	met-d-L_VLDL_CE_pct	rs40270	C	A	0.771677	Cholesteryl esters to total lipids ratio in large VLDL || id:met-d-L_VLDL_CE_pct	TRUE	reported	igd
735	5	55868097	-0.0290945	0.0044598	9.1e-12	NA	met-d-L_VLDL_CE_pct	rs13179413	T	C	0.285358	Cholesteryl esters to total lipids ratio in large VLDL || id:met-d-L_VLDL_CE_pct	TRUE	reported	igd
736	5	74618186	0.0357538	0.00417132	4.2e-18	NA	met-d-L_VLDL_CE_pct	rs13358429	A	G	0.340706	Cholesteryl esters to total lipids ratio in large VLDL || id:met-d-L_VLDL_CE_pct	TRUE	reported	igd
737	5	74472939	0.026958	0.00411895	4e-11	NA	met-d-L_VLDL_CE_pct	rs7707394	A	G	0.357082	Cholesteryl esters to total lipids ratio in large VLDL || id:met-d-L_VLDL_CE_pct	TRUE	reported	igd
738	6	160922870	0.285755	0.0146438	1.5e-86	NA	met-d-L_VLDL_CE_pct	rs117733303	G	A	0.018498	Cholesteryl esters to total lipids ratio in large VLDL || id:met-d-L_VLDL_CE_pct	TRUE	reported	igd
739	6	32603825	-0.0378459	0.00412732	1.3e-20	NA	met-d-L_VLDL_CE_pct	rs3129774	T	C	0.440049	Cholesteryl esters to total lipids ratio in large VLDL || id:met-d-L_VLDL_CE_pct	TRUE	reported	igd
740	6	127455029	-0.0234939	0.00396068	9.4e-10	NA	met-d-L_VLDL_CE_pct	rs2186037	G	A	0.5188	Cholesteryl esters to total lipids ratio in large VLDL || id:met-d-L_VLDL_CE_pct	TRUE	reported	igd
741	6	161017363	0.118722	0.0109892	4.7e-28	NA	met-d-L_VLDL_CE_pct	rs73596816	A	G	0.033598	Cholesteryl esters to total lipids ratio in large VLDL || id:met-d-L_VLDL_CE_pct	TRUE	reported	igd
742	6	160443763	-0.088413	0.0160133	9.6e-09	NA	met-d-L_VLDL_CE_pct	rs74515649	T	C	0.015916	Cholesteryl esters to total lipids ratio in large VLDL || id:met-d-L_VLDL_CE_pct	TRUE	reported	igd
743	6	160710851	0.0634869	0.00542783	4.5e-32	NA	met-d-L_VLDL_CE_pct	rs3127580	T	C	0.156212	Cholesteryl esters to total lipids ratio in large VLDL || id:met-d-L_VLDL_CE_pct	TRUE	reported	igd
744	6	161010118	0.227947	0.0073173	1e-200	NA	met-d-L_VLDL_CE_pct	rs10455872	G	A	0.07898	Cholesteryl esters to total lipids ratio in large VLDL || id:met-d-L_VLDL_CE_pct	TRUE	reported	igd
745	6	161339399	-0.0673651	0.0117071	4.9e-10	NA	met-d-L_VLDL_CE_pct	rs1247304	G	A	0.0306	Cholesteryl esters to total lipids ratio in large VLDL || id:met-d-L_VLDL_CE_pct	TRUE	reported	igd
746	6	43758873	-0.0267812	0.00397576	3.7e-11	NA	met-d-L_VLDL_CE_pct	rs6905288	A	G	0.56856	Cholesteryl esters to total lipids ratio in large VLDL || id:met-d-L_VLDL_CE_pct	TRUE	reported	igd
747	6	160578069	0.135032	0.0171017	3.9e-15	NA	met-d-L_VLDL_CE_pct	rs146534110	T	G	0.01351	Cholesteryl esters to total lipids ratio in large VLDL || id:met-d-L_VLDL_CE_pct	TRUE	reported	igd
748	7	28232457	0.0258994	0.00416172	2.4e-10	NA	met-d-L_VLDL_CE_pct	rs849327	G	A	0.656001	Cholesteryl esters to total lipids ratio in large VLDL || id:met-d-L_VLDL_CE_pct	TRUE	reported	igd
749	7	1029585	-0.0337233	0.00406994	6.8e-18	NA	met-d-L_VLDL_CE_pct	rs9769088	C	T	0.390956	Cholesteryl esters to total lipids ratio in large VLDL || id:met-d-L_VLDL_CE_pct	TRUE	reported	igd
750	7	25991826	0.044288	0.00540794	1.3e-17	NA	met-d-L_VLDL_CE_pct	rs4722551	C	T	0.158095	Cholesteryl esters to total lipids ratio in large VLDL || id:met-d-L_VLDL_CE_pct	TRUE	reported	igd
751	7	73033559	0.0993993	0.00587131	3e-65	NA	met-d-L_VLDL_CE_pct	rs34062580	A	G	0.130277	Cholesteryl esters to total lipids ratio in large VLDL || id:met-d-L_VLDL_CE_pct	TRUE	reported	igd
752	7	72082604	-0.0547089	0.010033	7.6e-09	NA	met-d-L_VLDL_CE_pct	rs28454618	A	G	0.046038	Cholesteryl esters to total lipids ratio in large VLDL || id:met-d-L_VLDL_CE_pct	TRUE	reported	igd
753	7	68621429	0.0219637	0.00406532	3.5e-09	NA	met-d-L_VLDL_CE_pct	rs1195221	T	G	0.5995	Cholesteryl esters to total lipids ratio in large VLDL || id:met-d-L_VLDL_CE_pct	TRUE	reported	igd
754	8	11133175	-0.0336466	0.00402957	2.6e-17	NA	met-d-L_VLDL_CE_pct	rs12677504	A	G	0.587794	Cholesteryl esters to total lipids ratio in large VLDL || id:met-d-L_VLDL_CE_pct	TRUE	reported	igd
755	8	19819328	0.0903021	0.00655689	2.4e-44	NA	met-d-L_VLDL_CE_pct	rs325	C	T	0.10052	Cholesteryl esters to total lipids ratio in large VLDL || id:met-d-L_VLDL_CE_pct	TRUE	reported	igd
756	8	126507389	0.0306106	0.00430811	1.8e-12	NA	met-d-L_VLDL_CE_pct	rs2954038	A	C	0.698667	Cholesteryl esters to total lipids ratio in large VLDL || id:met-d-L_VLDL_CE_pct	TRUE	reported	igd
757	9	139356987	-0.0243444	0.00430815	3.3e-09	NA	met-d-L_VLDL_CE_pct	rs57994353	C	T	0.300857	Cholesteryl esters to total lipids ratio in large VLDL || id:met-d-L_VLDL_CE_pct	TRUE	reported	igd
758	9	136141870	0.0745374	0.00510653	7.4e-49	NA	met-d-L_VLDL_CE_pct	rs2519093	T	C	0.183737	Cholesteryl esters to total lipids ratio in large VLDL || id:met-d-L_VLDL_CE_pct	TRUE	reported	igd
759	10	65124098	0.0357936	0.00395427	1.8e-20	NA	met-d-L_VLDL_CE_pct	rs10822163	G	C	0.474409	Cholesteryl esters to total lipids ratio in large VLDL || id:met-d-L_VLDL_CE_pct	TRUE	reported	igd
760	10	95342772	-0.0365168	0.00625477	1.2e-09	NA	met-d-L_VLDL_CE_pct	rs7091593	T	A	0.113923	Cholesteryl esters to total lipids ratio in large VLDL || id:met-d-L_VLDL_CE_pct	TRUE	reported	igd
761	11	65473798	-0.0307365	0.00435381	2.1e-13	NA	met-d-L_VLDL_CE_pct	rs10750766	A	C	0.709788	Cholesteryl esters to total lipids ratio in large VLDL || id:met-d-L_VLDL_CE_pct	TRUE	reported	igd
762	11	116916060	-0.151428	0.0200049	1.1e-14	NA	met-d-L_VLDL_CE_pct	rs144018203	C	G	0.010655	Cholesteryl esters to total lipids ratio in large VLDL || id:met-d-L_VLDL_CE_pct	TRUE	reported	igd
763	11	63957835	-0.0433544	0.0084116	4.4e-08	NA	met-d-L_VLDL_CE_pct	rs11231721	A	G	0.058846	Cholesteryl esters to total lipids ratio in large VLDL || id:met-d-L_VLDL_CE_pct	TRUE	reported	igd
764	11	116648917	0.103408	0.00582486	2.1e-73	NA	met-d-L_VLDL_CE_pct	rs964184	C	G	0.867256	Cholesteryl esters to total lipids ratio in large VLDL || id:met-d-L_VLDL_CE_pct	TRUE	reported	igd
765	11	61552680	-0.0597602	0.00415388	1.1e-49	NA	met-d-L_VLDL_CE_pct	rs174537	T	G	0.34312	Cholesteryl esters to total lipids ratio in large VLDL || id:met-d-L_VLDL_CE_pct	TRUE	reported	igd
766	12	112442288	0.0447282	0.00679571	6.1e-11	NA	met-d-L_VLDL_CE_pct	rs12426505	A	G	0.093092	Cholesteryl esters to total lipids ratio in large VLDL || id:met-d-L_VLDL_CE_pct	TRUE	reported	igd
767	14	94844947	0.0975541	0.0141588	1.1e-11	NA	met-d-L_VLDL_CE_pct	rs28929474	T	C	0.019975	Cholesteryl esters to total lipids ratio in large VLDL || id:met-d-L_VLDL_CE_pct	TRUE	reported	igd
768	15	43726625	-0.0719347	0.0124886	1.1e-08	NA	met-d-L_VLDL_CE_pct	rs150844304	C	A	0.025679	Cholesteryl esters to total lipids ratio in large VLDL || id:met-d-L_VLDL_CE_pct	TRUE	reported	igd
769	15	58683366	-0.112372	0.00405632	8.79e-175	NA	met-d-L_VLDL_CE_pct	rs1532085	G	A	0.61396	Cholesteryl esters to total lipids ratio in large VLDL || id:met-d-L_VLDL_CE_pct	TRUE	reported	igd
770	15	59012322	-0.0534668	0.00923552	9.8e-09	NA	met-d-L_VLDL_CE_pct	rs4775090	A	G	0.049463	Cholesteryl esters to total lipids ratio in large VLDL || id:met-d-L_VLDL_CE_pct	TRUE	reported	igd
771	15	58602300	0.0303144	0.00396214	6.6e-15	NA	met-d-L_VLDL_CE_pct	rs261265	A	C	0.454518	Cholesteryl esters to total lipids ratio in large VLDL || id:met-d-L_VLDL_CE_pct	TRUE	reported	igd
772	15	58723939	0.139474	0.0047773	3.3e-195	NA	met-d-L_VLDL_CE_pct	rs2070895	A	G	0.218665	Cholesteryl esters to total lipids ratio in large VLDL || id:met-d-L_VLDL_CE_pct	TRUE	reported	igd
773	16	57076115	-0.0786555	0.0153656	3.3e-08	NA	met-d-L_VLDL_CE_pct	rs158482	G	T	0.983231	Cholesteryl esters to total lipids ratio in large VLDL || id:met-d-L_VLDL_CE_pct	TRUE	reported	igd
774	16	15119607	-0.0296563	0.0047676	1e-10	NA	met-d-L_VLDL_CE_pct	rs8059755	C	T	0.558648	Cholesteryl esters to total lipids ratio in large VLDL || id:met-d-L_VLDL_CE_pct	TRUE	reported	igd
775	16	56991363	-0.108294	0.0042219	1.4e-148	NA	met-d-L_VLDL_CE_pct	rs183130	T	C	0.324034	Cholesteryl esters to total lipids ratio in large VLDL || id:met-d-L_VLDL_CE_pct	TRUE	reported	igd
776	16	81534790	0.0247593	0.0043033	2.3e-08	NA	met-d-L_VLDL_CE_pct	rs2925979	C	T	0.698932	Cholesteryl esters to total lipids ratio in large VLDL || id:met-d-L_VLDL_CE_pct	TRUE	reported	igd
777	16	56896730	-0.0250637	0.00399511	2.9e-10	NA	met-d-L_VLDL_CE_pct	rs3829502	A	G	0.436346	Cholesteryl esters to total lipids ratio in large VLDL || id:met-d-L_VLDL_CE_pct	TRUE	reported	igd
778	17	41926126	-0.0925115	0.0113156	8.6e-17	NA	met-d-L_VLDL_CE_pct	rs72836561	T	C	0.031477	Cholesteryl esters to total lipids ratio in large VLDL || id:met-d-L_VLDL_CE_pct	TRUE	reported	igd
779	17	64210580	0.158608	0.0114861	1.7e-45	NA	met-d-L_VLDL_CE_pct	rs1801689	C	A	0.03053	Cholesteryl esters to total lipids ratio in large VLDL || id:met-d-L_VLDL_CE_pct	TRUE	reported	igd
780	17	67081278	0.153068	0.0132889	1e-31	NA	met-d-L_VLDL_CE_pct	rs77542162	G	A	0.022665	Cholesteryl esters to total lipids ratio in large VLDL || id:met-d-L_VLDL_CE_pct	TRUE	reported	igd
781	17	45737275	-0.0242383	0.00396648	1.4e-10	NA	met-d-L_VLDL_CE_pct	rs4264433	T	A	0.514817	Cholesteryl esters to total lipids ratio in large VLDL || id:met-d-L_VLDL_CE_pct	TRUE	reported	igd
782	17	67100804	-0.0241936	0.00472508	3.2e-08	NA	met-d-L_VLDL_CE_pct	rs200938405	AC	A	0.701628	Cholesteryl esters to total lipids ratio in large VLDL || id:met-d-L_VLDL_CE_pct	TRUE	reported	igd
783	19	45413233	-0.199241	0.00728926	8.71e-169	NA	met-d-L_VLDL_CE_pct	rs1065853	T	G	0.080574	Cholesteryl esters to total lipids ratio in large VLDL || id:met-d-L_VLDL_CE_pct	TRUE	reported	igd
784	19	11275842	0.0270232	0.00422361	3.5e-11	NA	met-d-L_VLDL_CE_pct	rs3185010	A	G	0.327203	Cholesteryl esters to total lipids ratio in large VLDL || id:met-d-L_VLDL_CE_pct	TRUE	reported	igd
785	19	45441907	-0.0261673	0.00424806	2.3e-11	NA	met-d-L_VLDL_CE_pct	rs12976395	C	G	0.504547	Cholesteryl esters to total lipids ratio in large VLDL || id:met-d-L_VLDL_CE_pct	TRUE	reported	igd
786	19	46385438	-0.0431958	0.00612247	1.6e-13	NA	met-d-L_VLDL_CE_pct	rs34514836	C	A	0.119402	Cholesteryl esters to total lipids ratio in large VLDL || id:met-d-L_VLDL_CE_pct	TRUE	reported	igd
787	19	11192550	-0.0949319	0.00607194	2e-59	NA	met-d-L_VLDL_CE_pct	rs73015020	A	G	0.120202	Cholesteryl esters to total lipids ratio in large VLDL || id:met-d-L_VLDL_CE_pct	TRUE	reported	igd
788	20	17844684	-0.0275914	0.00417463	4.3e-11	NA	met-d-L_VLDL_CE_pct	rs2618566	T	G	0.660298	Cholesteryl esters to total lipids ratio in large VLDL || id:met-d-L_VLDL_CE_pct	TRUE	reported	igd
789	20	44547970	0.0379204	0.00462527	5.3e-18	NA	met-d-L_VLDL_CE_pct	rs2868346	T	C	0.758792	Cholesteryl esters to total lipids ratio in large VLDL || id:met-d-L_VLDL_CE_pct	TRUE	reported	igd
790	20	62196253	-0.0241729	0.00400697	4.8e-10	NA	met-d-L_VLDL_CE_pct	rs310631	A	C	0.412738	Cholesteryl esters to total lipids ratio in large VLDL || id:met-d-L_VLDL_CE_pct	TRUE	reported	igd
791	22	44324730	0.0328216	0.00479802	3.8e-12	NA	met-d-L_VLDL_CE_pct	rs738408	T	C	0.21655	Cholesteryl esters to total lipids ratio in large VLDL || id:met-d-L_VLDL_CE_pct	TRUE	reported	igd
